# Supplementary material for: Whole-Genome Sequencing of 502 Individuals from Latvia: The First Step towards a Population-Specific Reference of Genetic Variation
Source: Int J Mol Sci. 2023 Oct 19;24(20):15345. doi: 10.3390/ijms242015345 (PMC10607061; doi:10.3390/ijms242015345)
Supplement: Supplementary file 1 [file ijms-24-15345-s001.zip › Supplementary File S1.xls]

## Sheet: Sheet1
Additional file 1.xls, “Description of 5981 AADR dataset samples included in PCA analysis.”, data provides source publication for each sample ID as well as age (0 to 18775 years), Country of origin, Group, Locality as well as Latitude and Longitude.
IID	Age	Country	Group	Lat.	Locality	Long.	Source	Publication
I001.HO	0	Iran	Ignore_Iran_Zoroastrian_PCA_outlierHO	32.647836	Isfahan	51.655097	aadr	BroushakiScience2016
I002.HO	0	Iran	Ignore_Iran_Zoroastrian_PCA_outlierHO	32.647836	Isfahan	51.655097	aadr	BroushakiScience2016
IREJ-T006.HO	0	Iran	Iran_FarsHO	31.897222	Yazd // Farsi	54.367778	aadr	BroushakiScience2016
IREJ-T009.HO	0	Iran	Iran_FarsHO	32.6707877	Esfahan // Farsi	51.6650002	aadr	BroushakiScience2016
IREJ-T022.HO	0	Iran	Iran_FarsHO	39.2883	Maku // Farsi	44.4996	aadr	BroushakiScience2016
IREJ-T023.HO	0	Iran	Iran_FarsHO	35.685103	Tehran // Farsi	51.385181	aadr	BroushakiScience2016
IREJ-T026.HO	0	Iran	Iran_FarsHO	34.6293	Qom // Farsi	50.8525	aadr	BroushakiScience2016
IREJ-T027.HO	0	Iran	Iran_FarsHO	33.9897417	Kashan // Farsi	51.4281379	aadr	BroushakiScience2016
IREJ-T037.HO	0	Iran	Iran_FarsHO	36.4197	Shahrud // Farsi	54.965	aadr	BroushakiScience2016
IREJ-T040.HO	0	Iran	Iran_FarsHO	33.9897417	Kashan // Farsi	51.4281379	aadr	BroushakiScience2016
IREJ-T053.HO	0	Iran	Iran_FarsHO	31.897222	Yazd // Farsi	54.367778	aadr	BroushakiScience2016
IREJ-T064.HO	0	Iran	Iran_FarsHO	29.616667	Shiraz // Farsi	52.533333	aadr	BroushakiScience2016
IREJ-T078.HO	0	Iran	Iran_FarsHO	36.5658725	Sari // Farsi	53.058569	aadr	BroushakiScience2016
IREJ-T090.HO	0	Iran	Iran_FarsHO	35.2222875	Garmsar // Farsi	52.3383855	aadr	BroushakiScience2016
IREJ-T101.HO	0	Iran	Iran_FarsHO	33.2306884	Khansar // Farsi	50.3204583	aadr	BroushakiScience2016
IREJ-T103.HO	0	Iran	Iran_FarsHO	36.378	Mazandaran // Farsi	52.212	aadr	BroushakiScience2016
IREJ-T111.HO	0	Iran	Iran_FarsHO	29.616667	Shiraz // Farsi	52.533333	aadr	BroushakiScience2016
IREJ-T184.HO	0	Iran	Iran_FarsHO	29.616667	Shiraz // Farsi	52.533333	aadr	BroushakiScience2016
IREJ-T204.HO	0	Iran	Iran_FarsHO	37.4721642	Bandar-e Anzali // Farsi	49.4579175	aadr	BroushakiScience2016
SH001.HO	0	Iran	Iran_ZoroastrianHO	29.628576	Shiraz	52.502117	aadr	BroushakiScience2016
SH003.HO	0	Iran	Iran_ZoroastrianHO	29.628576	Shiraz	52.502117	aadr	BroushakiScience2016
SH004.HO	0	Iran	Iran_ZoroastrianHO	29.628576	Shiraz	52.502117	aadr	BroushakiScience2016
SH005.HO	0	Iran	Iran_ZoroastrianHO	29.628576	Shiraz	52.502117	aadr	BroushakiScience2016
SH007.HO	0	Iran	Iran_ZoroastrianHO	29.628576	Shiraz	52.502117	aadr	BroushakiScience2016
SH008.HO	0	Iran	Iran_ZoroastrianHO	29.628576	Shiraz	52.502117	aadr	BroushakiScience2016
T003.HO	0	Iran	Iran_ZoroastrianHO	35.685103	Teheran	51.385181	aadr	BroushakiScience2016
T006.HO	0	Iran	Iran_ZoroastrianHO	35.685103	Teheran	51.385181	aadr	BroushakiScience2016
T007.HO	0	Iran	Iran_ZoroastrianHO	35.685103	Teheran	51.385181	aadr	BroushakiScience2016
T010.HO	0	Iran	Iran_ZoroastrianHO	35.685103	Teheran	51.385181	aadr	BroushakiScience2016
T011.HO	0	Iran	Iran_ZoroastrianHO	35.685103	Teheran	51.385181	aadr	BroushakiScience2016
T012.HO	0	Iran	Iran_ZoroastrianHO	35.685103	Teheran	51.385181	aadr	BroushakiScience2016
T013.HO	0	Iran	Iran_ZoroastrianHO	35.685103	Teheran	51.385181	aadr	BroushakiScience2016
T015.HO	0	Iran	Iran_ZoroastrianHO	35.685103	Teheran	51.385181	aadr	BroushakiScience2016
T016.HO	0	Iran	Iran_ZoroastrianHO	35.685103	Teheran	51.385181	aadr	BroushakiScience2016
YZ018.HO	0	Iran	Iran_Zoroastrian_outlierHO	31.897222	Yazd	54.367778	aadr	BroushakiScience2016
YZ019.HO	0	Iran	Iran_ZoroastrianHO	31.897222	Yazd	54.367778	aadr	BroushakiScience2016
YZ020.HO	0	Iran	Ignore_Iran_Zoroastrian_PCA_outlierHO	31.897222	Mazrakalantar	54.367778	aadr	BroushakiScience2016
YZ021.HO	0	Iran	Iran_ZoroastrianHO	31.897222	Yazd	54.367778	aadr	BroushakiScience2016
YZ022.HO	0	Iran	Iran_ZoroastrianHO	31.897222	Yazd	54.367778	aadr	BroushakiScience2016
YZ024.HO	0	Iran	Iran_Zoroastrian_outlierHO	31.897222	Yazd	54.367778	aadr	BroushakiScience2016
YZ030.HO	0	Iran	Iran_ZoroastrianHO	31.897222	Miriamabad	54.367778	aadr	BroushakiScience2016
YZ033.HO	0	Iran	Iran_ZoroastrianHO	31.897222	Miriamabad	54.367778	aadr	BroushakiScience2016
YZ035.HO	0	Iran	Iran_ZoroastrianHO	31.897222	Yazd	54.367778	aadr	BroushakiScience2016
YZ037.HO	0	Iran	Iran_ZoroastrianHO	31.897222	Yazd	54.367778	aadr	BroushakiScience2016
YZ039.HO	0	Iran	Iran_ZoroastrianHO	31.897222	Yazd	54.367778	aadr	BroushakiScience2016
YZ041.HO	0	Iran	Iran_ZoroastrianHO	31.897222	Sharijabad	54.367778	aadr	BroushakiScience2016
AZR-1010.HO	0	Azerbaijan	AzeriHO	40.06	Azerbajan	47.19	aadr	JeongNatureEcologyEvolution2019
AZR-1012.HO	0	Azerbaijan	AzeriHO	40.06	Azerbajan	47.19	aadr	JeongNatureEcologyEvolution2019
AZR-1013.HO	0	Azerbaijan	AzeriHO	40.06	Azerbajan	47.19	aadr	JeongNatureEcologyEvolution2019
AZR-1017.HO	0	Azerbaijan	AzeriHO	40.06	Azerbajan	47.19	aadr	JeongNatureEcologyEvolution2019
AZR-1018.HO	0	Azerbaijan	AzeriHO	40.06	Azerbajan	47.19	aadr	JeongNatureEcologyEvolution2019
AZR-1037.HO	0	Azerbaijan	AzeriHO	40.06	Azerbajan	47.19	aadr	JeongNatureEcologyEvolution2019
AZR-1039.HO	0	Azerbaijan	AzeriHO	40.06	Azerbajan	47.19	aadr	JeongNatureEcologyEvolution2019
AZR-1054.HO	0	Azerbaijan	AzeriHO	40.06	Azerbajan	47.19	aadr	JeongNatureEcologyEvolution2019
AZR-1058.HO	0	Azerbaijan	AzeriHO	40.06	Azerbajan	47.19	aadr	JeongNatureEcologyEvolution2019
EZI-001.HO	0	Armenia	EzidHO	36.9	Armavir and Aragotchotansk regions	46.6	aadr	JeongNatureEcologyEvolution2019
EZI-010.HO	0	Armenia	EzidHO	36.9	Armavir and Aragotchotansk regions	46.6	aadr	JeongNatureEcologyEvolution2019
EZI-012.HO	0	Armenia	EzidHO	36.9	Armavir and Aragotchotansk regions	46.6	aadr	JeongNatureEcologyEvolution2019
EZI-013.HO	0	Armenia	EzidHO	36.9	Armavir and Aragotchotansk regions	46.6	aadr	JeongNatureEcologyEvolution2019
EZI-020.HO	0	Armenia	EzidHO	36.9	Armavir and Aragotchotansk regions	46.6	aadr	JeongNatureEcologyEvolution2019
EZI-029.HO	0	Armenia	EzidHO	36.9	Armavir and Aragotchotansk regions	46.6	aadr	JeongNatureEcologyEvolution2019
EZI-057.HO	0	Armenia	Ignore_Ezid_<095_completenessHO	36.9	Armavir and Aragotchotansk regions	46.6	aadr	JeongNatureEcologyEvolution2019
EZI-060.HO	0	Armenia	EzidHO	36.9	Armavir and Aragotchotansk regions	46.6	aadr	JeongNatureEcologyEvolution2019
EZI-074.HO	0	Armenia	EzidHO	36.9	Armavir and Aragotchotansk regions	46.6	aadr	JeongNatureEcologyEvolution2019
GAG-183.HO	0	Moldova	GagauzHO	45.54	Chadyr-Lungsky district (Kiriet-Lunga, Kazaklia, Kopchak) and Vulkaneshtsky district (Chishmekioy)	28.38	aadr	JeongNatureEcologyEvolution2019
GAG-187.HO	0	Moldova	GagauzHO	45.54	Chadyr-Lungsky district (Kiriet-Lunga, Kazaklia, Kopchak) and Vulkaneshtsky district (Chishmekioy)	28.38	aadr	JeongNatureEcologyEvolution2019
GAG-188.HO	0	Moldova	GagauzHO	45.54	Chadyr-Lungsky district (Kiriet-Lunga, Kazaklia, Kopchak) and Vulkaneshtsky district (Chishmekioy)	28.38	aadr	JeongNatureEcologyEvolution2019
GAG-189.HO	0	Moldova	GagauzHO	45.54	Chadyr-Lungsky district (Kiriet-Lunga, Kazaklia, Kopchak) and Vulkaneshtsky district (Chishmekioy)	28.38	aadr	JeongNatureEcologyEvolution2019
GAG-196.HO	0	Moldova	GagauzHO	45.54	Chadyr-Lungsky district (Kiriet-Lunga, Kazaklia, Kopchak) and Vulkaneshtsky district (Chishmekioy)	28.38	aadr	JeongNatureEcologyEvolution2019
GAG-215.HO	0	Moldova	GagauzHO	45.54	Chadyr-Lungsky district (Kiriet-Lunga, Kazaklia, Kopchak) and Vulkaneshtsky district (Chishmekioy)	28.38	aadr	JeongNatureEcologyEvolution2019
GAG-220.HO	0	Moldova	GagauzHO	45.54	Chadyr-Lungsky district (Kiriet-Lunga, Kazaklia, Kopchak) and Vulkaneshtsky district (Chishmekioy)	28.38	aadr	JeongNatureEcologyEvolution2019
GAG-221.HO	0	Moldova	GagauzHO	45.54	Chadyr-Lungsky district (Kiriet-Lunga, Kazaklia, Kopchak) and Vulkaneshtsky district (Chishmekioy)	28.38	aadr	JeongNatureEcologyEvolution2019
GAG-226.HO	0	Moldova	GagauzHO	45.54	Chadyr-Lungsky district (Kiriet-Lunga, Kazaklia, Kopchak) and Vulkaneshtsky district (Chishmekioy)	28.38	aadr	JeongNatureEcologyEvolution2019
GEO-002.HO	0	Turkey	GeorgianHO	40.93	Turkey	40.84	aadr	JeongNatureEcologyEvolution2019
GEO-005.HO	0	Turkey	GeorgianHO	40.93	Turkey	40.84	aadr	JeongNatureEcologyEvolution2019
GEO-010.HO	0	Turkey	GeorgianHO	40.93	Turkey	40.84	aadr	JeongNatureEcologyEvolution2019
GEO-015.HO	0	Georgia	GeorgianHO	42.25	Georgia	42.7	aadr	JeongNatureEcologyEvolution2019
GEO-020.HO	0	Georgia	GeorgianHO	42.25	Georgia	42.7	aadr	JeongNatureEcologyEvolution2019
GEO-028.HO	0	Georgia	GeorgianHO	42.25	Georgia	42.7	aadr	JeongNatureEcologyEvolution2019
GEO-031.HO	0	Georgia	GeorgianHO	42.25	Georgia	42.7	aadr	JeongNatureEcologyEvolution2019
GEO-032.HO	0	Georgia	GeorgianHO	42.25	Georgia	42.7	aadr	JeongNatureEcologyEvolution2019
GEO-039.HO	0	Georgia	GeorgianHO	42.25	Georgia	42.7	aadr	JeongNatureEcologyEvolution2019
GEO-051.HO	0	Turkey	GeorgianHO	40.93	Turkey	40.84	aadr	JeongNatureEcologyEvolution2019
GEO-061.HO	0	Turkey	GeorgianHO	40.93	Turkey	40.84	aadr	JeongNatureEcologyEvolution2019
GEO-082.HO	0	Turkey	GeorgianHO	40.93	Turkey	40.84	aadr	JeongNatureEcologyEvolution2019
GEO001.HO	0	Turkey	GeorgianHO	40.93	Turkey	40.84	aadr	JeongNatureEcologyEvolution2019
MOL-005.HO	0	Moldova	MoldavianHO	46.38	Shtefan-Vodsky district, Kaplani	29.87	aadr	JeongNatureEcologyEvolution2019
MOL-008.HO	0	Moldova	MoldavianHO	46.38	Shtefan-Vodsky district, Kaplani	29.87	aadr	JeongNatureEcologyEvolution2019
MOL-015.HO	0	Moldova	MoldavianHO	46.38	Shtefan-Vodsky district, Kaplani	29.87	aadr	JeongNatureEcologyEvolution2019
MOL-024.HO	0	Moldova	MoldavianHO	46.38	Shtefan-Vodsky district, Kaplani	29.87	aadr	JeongNatureEcologyEvolution2019
MOL-058.HO	0	Moldova	MoldavianHO	46.38	Shtefan-Vodsky district, Kaplani	29.87	aadr	JeongNatureEcologyEvolution2019
MOL-064.HO	0	Moldova	MoldavianHO	46.38	Shtefan-Vodsky district, Kaplani	29.87	aadr	JeongNatureEcologyEvolution2019
MOL-065.HO	0	Moldova	MoldavianHO	46.38	Shtefan-Vodsky district, Kaplani	29.87	aadr	JeongNatureEcologyEvolution2019
MOL-066.HO	0	Moldova	MoldavianHO	46.38	Shtefan-Vodsky district, Kaplani	29.87	aadr	JeongNatureEcologyEvolution2019
MOL-067.HO	0	Moldova	MoldavianHO	46.38	Shtefan-Vodsky district, Kaplani	29.87	aadr	JeongNatureEcologyEvolution2019
MOL-069.HO	0	Moldova	MoldavianHO	46.38	Shtefan-Vodsky district, Kaplani	29.87	aadr	JeongNatureEcologyEvolution2019
UKR-1283.HO	0	Ukraine	UkrainianHO	50.82	Sumskaya region	33.87	aadr	JeongNatureEcologyEvolution2019
UKR-1291.HO	0	Ukraine	UkrainianHO	50.82	Sumskaya region	33.87	aadr	JeongNatureEcologyEvolution2019
UKR-1292.HO	0	Ukraine	UkrainianHO	50.82	Sumskaya region	33.87	aadr	JeongNatureEcologyEvolution2019
UKR-1377.HO	0	Ukraine	UkrainianHO	50.82	Sumskaya region	33.87	aadr	JeongNatureEcologyEvolution2019
UKR-1399.HO	0	Ukraine	Ukrainian_NorthHO	50.82	Sumskaya region	33.87	aadr	JeongNatureEcologyEvolution2019
UKR-1903.HO	0	Ukraine	Ukrainian_NorthHO	50.52	Zhitomirskaya region	28.55	aadr	JeongNatureEcologyEvolution2019
UKR-1909.HO	0	Ukraine	Ukrainian_NorthHO	50.52	Zhitomirskaya region	28.55	aadr	JeongNatureEcologyEvolution2019
UKR-1913.HO	0	Ukraine	Ukrainian_NorthHO	50.52	Zhitomirskaya region	28.55	aadr	JeongNatureEcologyEvolution2019
UKR-1951.HO	0	Ukraine	Ukrainian_NorthHO	51.32	Rovenskaya region	26.58	aadr	JeongNatureEcologyEvolution2019
UKR-1978.HO	0	Ukraine	Ukrainian_NorthHO	51.32	Rovenskaya region	26.58	aadr	JeongNatureEcologyEvolution2019
UKR-1992.HO	0	Ukraine	Ukrainian_NorthHO	51.32	Rovenskaya region	26.58	aadr	JeongNatureEcologyEvolution2019
UKR-2021.HO	0	Ukraine	Ukrainian_NorthHO	50.52	Zhitomirskaya region	28.55	aadr	JeongNatureEcologyEvolution2019
HGDP00511.HO	0	France	FrenchHO	46	..	2	aadr	PattersonGenetics2012
HGDP00512.HO	0	France	FrenchHO	46	..	2	aadr	PattersonGenetics2012
HGDP00513.HO	0	France	FrenchHO	46	..	2	aadr	PattersonGenetics2012
HGDP00514.HO	0	France	FrenchHO	46	..	2	aadr	PattersonGenetics2012
HGDP00515.HO	0	France	FrenchHO	46	..	2	aadr	PattersonGenetics2012
HGDP00516.HO	0	France	FrenchHO	46	..	2	aadr	PattersonGenetics2012
HGDP00517.HO	0	France	FrenchHO	46	..	2	aadr	PattersonGenetics2012
HGDP00518.HO	0	France	FrenchHO	46	..	2	aadr	PattersonGenetics2012
HGDP00519.HO	0	France	FrenchHO	46	..	2	aadr	PattersonGenetics2012
HGDP00520.HO	0	France	Ignore_FrenchHO	46	..	2	aadr	PattersonGenetics2012
HGDP00521.HO	0	France	Ignore_French_discoveryHO	46	..	2	aadr	PattersonGenetics2012
HGDP00522.HO	0	France	FrenchHO	46	..	2	aadr	PattersonGenetics2012
HGDP00523.HO	0	France	FrenchHO	46	..	2	aadr	PattersonGenetics2012
HGDP00524.HO	0	France	FrenchHO	46	..	2	aadr	PattersonGenetics2012
HGDP00525.HO	0	France	FrenchHO	46	..	2	aadr	PattersonGenetics2012
HGDP00526.HO	0	France	FrenchHO	46	..	2	aadr	PattersonGenetics2012
HGDP00527.HO	0	France	FrenchHO	46	..	2	aadr	PattersonGenetics2012
HGDP00528.HO	0	France	FrenchHO	46	..	2	aadr	PattersonGenetics2012
HGDP00529.HO	0	France	FrenchHO	46	..	2	aadr	PattersonGenetics2012
HGDP00530.HO	0	France	French_oHO	46	..	2	aadr	PattersonGenetics2012
HGDP00531.HO	0	France	FrenchHO	46	..	2	aadr	PattersonGenetics2012
HGDP00533.HO	0	France	FrenchHO	46	..	2	aadr	PattersonGenetics2012
HGDP00534.HO	0	France	FrenchHO	46	..	2	aadr	PattersonGenetics2012
HGDP00535.HO	0	France	FrenchHO	46	..	2	aadr	PattersonGenetics2012
HGDP00536.HO	0	France	FrenchHO	46	..	2	aadr	PattersonGenetics2012
HGDP00537.HO	0	France	FrenchHO	46	..	2	aadr	PattersonGenetics2012
HGDP00538.HO	0	France	FrenchHO	46	..	2	aadr	PattersonGenetics2012
HGDP00539.HO	0	France	FrenchHO	46	..	2	aadr	PattersonGenetics2012
HGDP00665.HO	0	Italy	Ignore_Sardinian_discoveryHO	40	..	9	aadr	PattersonGenetics2012
HGDP00666.HO	0	Italy	SardinianHO	40	..	9	aadr	PattersonGenetics2012
HGDP00667.HO	0	Italy	SardinianHO	40	..	9	aadr	PattersonGenetics2012
HGDP00668.HO	0	Italy	SardinianHO	40	..	9	aadr	PattersonGenetics2012
HGDP00669.HO	0	Italy	SardinianHO	40	..	9	aadr	PattersonGenetics2012
HGDP00670.HO	0	Italy	SardinianHO	40	..	9	aadr	PattersonGenetics2012
HGDP00671.HO	0	Italy	SardinianHO	40	..	9	aadr	PattersonGenetics2012
HGDP00672.HO	0	Italy	Italian_SardinianHO	40	..	9	aadr	PattersonGenetics2012
HGDP00673.HO	0	Italy	SardinianHO	40	..	9	aadr	PattersonGenetics2012
HGDP00674.HO	0	Italy	SardinianHO	40	..	9	aadr	PattersonGenetics2012
HGDP00794.HO	0	United Kingdom	OrcadianHO	59	Orkney Islands	-3	aadr	PattersonGenetics2012
HGDP00796.HO	0	United Kingdom	OrcadianHO	59	Orkney Islands	-3	aadr	PattersonGenetics2012
HGDP00797.HO	0	United Kingdom	OrcadianHO	59	Orkney Islands	-3	aadr	PattersonGenetics2012
HGDP00798.HO	0	United Kingdom	OrcadianHO	59	Orkney Islands	-3	aadr	PattersonGenetics2012
HGDP00799.HO	0	United Kingdom	OrcadianHO	59	Orkney Islands	-3	aadr	PattersonGenetics2012
HGDP00800.HO	0	United Kingdom	OrcadianHO	59	Orkney Islands	-3	aadr	PattersonGenetics2012
HGDP00802.HO	0	United Kingdom	OrcadianHO	59	Orkney Islands	-3	aadr	PattersonGenetics2012
HGDP00803.HO	0	United Kingdom	OrcadianHO	59	Orkney Islands	-3	aadr	PattersonGenetics2012
HGDP00805.HO	0	United Kingdom	OrcadianHO	59	Orkney Islands	-3	aadr	PattersonGenetics2012
HGDP00806.HO	0	United Kingdom	OrcadianHO	59	Orkney Islands	-3	aadr	PattersonGenetics2012
HGDP00807.HO	0	United Kingdom	OrcadianHO	59	Orkney Islands	-3	aadr	PattersonGenetics2012
HGDP00808.HO	0	United Kingdom	OrcadianHO	59	Orkney Islands	-3	aadr	PattersonGenetics2012
HGDP00810.HO	0	United Kingdom	OrcadianHO	59	Orkney Islands	-3	aadr	PattersonGenetics2012
HGDP01062.HO	0	Italy	Italian_SardinianHO	40	..	9	aadr	PattersonGenetics2012
HGDP01063.HO	0	Italy	SardinianHO	40	..	9	aadr	PattersonGenetics2012
HGDP01064.HO	0	Italy	SardinianHO	40	..	9	aadr	PattersonGenetics2012
HGDP01065.HO	0	Italy	SardinianHO	40	..	9	aadr	PattersonGenetics2012
HGDP01066.HO	0	Italy	SardinianHO	40	..	9	aadr	PattersonGenetics2012
HGDP01067.HO	0	Italy	SardinianHO	40	..	9	aadr	PattersonGenetics2012
HGDP01068.HO	0	Italy	SardinianHO	40	..	9	aadr	PattersonGenetics2012
HGDP01069.HO	0	Italy	SardinianHO	40	..	9	aadr	PattersonGenetics2012
HGDP01070.HO	0	Italy	SardinianHO	40	..	9	aadr	PattersonGenetics2012
HGDP01071.HO	0	Italy	SardinianHO	40	..	9	aadr	PattersonGenetics2012
HGDP01072.HO	0	Italy	SardinianHO	40	..	9	aadr	PattersonGenetics2012
HGDP01073.HO	0	Italy	SardinianHO	40	..	9	aadr	PattersonGenetics2012
HGDP01074.HO	0	Italy	SardinianHO	40	..	9	aadr	PattersonGenetics2012
HGDP01075.HO	0	Italy	SardinianHO	40	..	9	aadr	PattersonGenetics2012
HGDP01076.HO	0	Italy	SardinianHO	40	..	9	aadr	PattersonGenetics2012
HGDP01077.HO	0	Italy	SardinianHO	40	..	9	aadr	PattersonGenetics2012
HGDP01078.HO	0	Italy	SardinianHO	40	..	9	aadr	PattersonGenetics2012
HGDP01079.HO	0	Italy	SardinianHO	40	..	9	aadr	PattersonGenetics2012
HGDP01147.HO	0	Italy	Italian_NorthHO	46	..	10	aadr	PattersonGenetics2012
HGDP01149.HO	0	Italy	Ignore_Italian_NorthHO	46	..	10	aadr	PattersonGenetics2012
HGDP01151.HO	0	Italy	Italian_NorthHO	46	..	10	aadr	PattersonGenetics2012
HGDP01152.HO	0	Italy	Italian_NorthHO	46	..	10	aadr	PattersonGenetics2012
HGDP01153.HO	0	Italy	Italian_NorthHO	46	..	10	aadr	PattersonGenetics2012
HGDP01155.HO	0	Italy	Italian_NorthHO	46	..	10	aadr	PattersonGenetics2012
HGDP01156.HO	0	Italy	Italian_NorthHO	46	..	10	aadr	PattersonGenetics2012
HGDP01157.HO	0	Italy	Italian_NorthHO	46	..	10	aadr	PattersonGenetics2012
HGDP01161.HO	0	Italy	Italian_NorthHO	43	..	11	aadr	PattersonGenetics2012
HGDP01162.HO	0	Italy	Italian_NorthHO	43	..	11	aadr	PattersonGenetics2012
HGDP01163.HO	0	Italy	Italian_NorthHO	43	..	11	aadr	PattersonGenetics2012
HGDP01164.HO	0	Italy	Italian_NorthHO	43	..	11	aadr	PattersonGenetics2012
HGDP01166.HO	0	Italy	Italian_NorthHO	43	..	11	aadr	PattersonGenetics2012
HGDP01167.HO	0	Italy	Italian_NorthHO	43	..	11	aadr	PattersonGenetics2012
HGDP01168.HO	0	Italy	Italian_NorthHO	43	..	11	aadr	PattersonGenetics2012
HGDP01169.HO	0	Italy	Italian_NorthHO	43	..	11	aadr	PattersonGenetics2012
HGDP01171.HO	0	Italy	Italian_NorthHO	46	..	10	aadr	PattersonGenetics2012
HGDP01172.HO	0	Italy	Italian_NorthHO	46	..	10	aadr	PattersonGenetics2012
HGDP01173.HO	0	Italy	Italian_NorthHO	46	..	10	aadr	PattersonGenetics2012
HGDP01174.HO	0	Italy	Italian_NorthHO	46	..	10	aadr	PattersonGenetics2012
HGDP01177.HO	0	Italy	Italian_NorthHO	46	..	10	aadr	PattersonGenetics2012
HGDP01357.HO	0	France	BasqueHO	43	..	0	aadr	PattersonGenetics2012
HGDP01358.HO	0	France	BasqueHO	43	..	0	aadr	PattersonGenetics2012
HGDP01359.HO	0	France	BasqueHO	43	..	0	aadr	PattersonGenetics2012
HGDP01360.HO	0	France	BasqueHO	43	..	0	aadr	PattersonGenetics2012
HGDP01362.HO	0	France	BasqueHO	43	..	0	aadr	PattersonGenetics2012
HGDP01363.HO	0	France	BasqueHO	43	..	0	aadr	PattersonGenetics2012
HGDP01364.HO	0	France	BasqueHO	43	..	0	aadr	PattersonGenetics2012
HGDP01365.HO	0	France	BasqueHO	43	..	0	aadr	PattersonGenetics2012
HGDP01366.HO	0	France	BasqueHO	43	..	0	aadr	PattersonGenetics2012
HGDP01367.HO	0	France	BasqueHO	43	..	0	aadr	PattersonGenetics2012
HGDP01368.HO	0	France	BasqueHO	43	..	0	aadr	PattersonGenetics2012
HGDP01369.HO	0	France	Ignore_BasqueHO	43	..	0	aadr	PattersonGenetics2012
HGDP01370.HO	0	France	BasqueHO	43	..	0	aadr	PattersonGenetics2012
HGDP01371.HO	0	France	BasqueHO	43	..	0	aadr	PattersonGenetics2012
HGDP01372.HO	0	France	Ignore_BasqueHO	43	..	0	aadr	PattersonGenetics2012
HGDP01373.HO	0	France	BasqueHO	43	..	0	aadr	PattersonGenetics2012
HGDP01374.HO	0	France	BasqueHO	43	..	0	aadr	PattersonGenetics2012
HGDP01375.HO	0	France	BasqueHO	43	..	0	aadr	PattersonGenetics2012
HGDP01377.HO	0	France	BasqueHO	43	..	0	aadr	PattersonGenetics2012
HGDP01378.HO	0	France	BasqueHO	43	..	0	aadr	PattersonGenetics2012
HGDP01379.HO	0	France	BasqueHO	43	..	0	aadr	PattersonGenetics2012
HGDP01380.HO	0	France	BasqueHO	43	..	0	aadr	PattersonGenetics2012
SD60_297.HO	0	Finland	SaamiWGAHO	68.383893	Enontekiö	23.632454	aadr	LazaridisNature2014
ARM012.HO	0	Armenia	ArmenianWGAHO	40.2	Yerevan	44.5	aadr	LazaridisNature2014
ARM013.HO	0	Armenia	ArmenianWGAHO	40.2	Yerevan	44.5	aadr	LazaridisNature2014
ARM014.HO	0	Armenia	ArmenianWGAHO	40.2	Yerevan	44.5	aadr	LazaridisNature2014
Baku01.HO	0	Azerbaijan	AzeriWGAHO	40.4	Baku	49.9	aadr	LazaridisNature2014
Baku02.HO	0	Azerbaijan	AzeriWGAHO	40.4	Baku	49.9	aadr	LazaridisNature2014
Baku03.HO	0	Azerbaijan	AzeriWGAHO	40.4	Baku	49.9	aadr	LazaridisNature2014
KRD_010.HO	0	Armenia	KurdWGAHO	40.7	Alagyaz	44.3	aadr	LazaridisNature2014
KRD_011.HO	0	Armenia	KurdWGAHO	40.7	Alagyaz	44.3	aadr	LazaridisNature2014
GEO013.HO	0	Georgia	GeorgianWGAHO	41.7	Tbilisi	44.8	aadr	LazaridisNature2014
GEO014.HO	0	Georgia	GeorgianWGAHO	41.7	Tbilisi	44.8	aadr	LazaridisNature2014
ASR_001.HO	0	Armenia	AssyrianWGAHO	40.3	Arzni	44.6	aadr	LazaridisNature2014
ASR_002.HO	0	Armenia	AssyrianWGAHO	40.3	Arzni	44.6	aadr	LazaridisNature2014
ASR_003.HO	0	Armenia	AssyrianWGAHO	40.3	Arzni	44.6	aadr	LazaridisNature2014
ASR_004.HO	0	Armenia	AssyrianWGA_outlierHO	40.3	Arzni	44.6	aadr	LazaridisNature2014
ASR_005.HO	0	Armenia	AssyrianWGAHO	40.3	Arzni	44.6	aadr	LazaridisNature2014
TLA010.HO	0	Greece	GreekWGAHO	37.9	Athens	23.7	aadr	LazaridisNature2014
TLA011.HO	0	Greece	Greek_outlierWGAHO	37.9	Athens	23.7	aadr	LazaridisNature2014
TLA012.HO	0	Greece	GreekWGAHO	37.9	Athens	23.7	aadr	LazaridisNature2014
TLA013.HO	0	Greece	Greek_outlierWGAHO	37.9	Athens	23.7	aadr	LazaridisNature2014
TLA015.HO	0	Greece	GreekWGAHO	37.9	Athens	23.7	aadr	LazaridisNature2014
TLA017.HO	0	Greece	GreekWGAHO	37.9	Athens	23.7	aadr	LazaridisNature2014
TLA018.HO	0	Greece	GreekWGAHO	37.9	Athens	23.7	aadr	LazaridisNature2014
TLA019.HO	0	Greece	GreekWGAHO	37.9	Athens	23.7	aadr	LazaridisNature2014
TLA020.HO	0	Greece	GreekWGAHO	37.9	Athens	23.7	aadr	LazaridisNature2014
TLA021.HO	0	Greece	GreekWGAHO	37.9	Athens	23.7	aadr	LazaridisNature2014
TLA022.HO	0	Greece	GreekWGAHO	37.9	Athens	23.7	aadr	LazaridisNature2014
TLA023.HO	0	Greece	GreekWGAHO	37.9	Athens	23.7	aadr	LazaridisNature2014
TLA024.HO	0	Greece	GreekWGAHO	37.9	Athens	23.7	aadr	LazaridisNature2014
TLA025.HO	0	Greece	GreekWGAHO	37.9	Athens	23.7	aadr	LazaridisNature2014
TLA026.HO	0	Greece	GreekWGAHO	37.9	Athens	23.7	aadr	LazaridisNature2014
TLA027.HO	0	Greece	GreekWGAHO	37.9	Athens	23.7	aadr	LazaridisNature2014
TLA028.HO	0	Greece	GreekWGAHO	37.9	Athens	23.7	aadr	LazaridisNature2014
TLA029.HO	0	Greece	GreekWGAHO	37.9	Athens	23.7	aadr	LazaridisNature2014
BulgarianD6.HO	0	Bulgaria	BulgarianHO	42.163403	Plovdiv	24.741211	aadr	LazaridisNature2014
BulgarianA4.HO	0	Bulgaria	BulgarianHO	42.163403	Plovdiv	24.741211	aadr	LazaridisNature2014
LithuanianF1.HO	0	Lithuania	LithuanianHO	54.901882	Kaunas	23.917236	aadr	LazaridisNature2014
iran19.HO	0	Iran	IranianHO	35.585852	migrants_collected_in_Kuwait	51.459961	aadr	LazaridisNature2014
iran14.HO	0	Iran	IranianHO	35.585852	migrants_collected_in_Kuwait	51.459961	aadr	LazaridisNature2014
BulgarianE2.HO	0	Bulgaria	BulgarianHO	42.163403	Plovdiv	24.741211	aadr	LazaridisNature2014
BulgarianB4.HO	0	Bulgaria	BulgarianHO	42.163403	Plovdiv	24.741211	aadr	LazaridisNature2014
lithuania3.HO	0	Lithuania	LithuanianHO	54.901882	Kaunas	23.917236	aadr	LazaridisNature2014
iran2.HO	0	Iran	IranianHO	35.585852	migrants_collected_in_Kuwait	51.459961	aadr	LazaridisNature2014
iran20.HO	0	Iran	IranianHO	35.585852	migrants_collected_in_Kuwait	51.459961	aadr	LazaridisNature2014
BulgarianA1.HO	0	Bulgaria	BulgarianHO	42.163403	Plovdiv	24.741211	aadr	LazaridisNature2014
lithuania10.HO	0	Lithuania	LithuanianHO	54.901882	Kaunas	23.917236	aadr	LazaridisNature2014
iran3.HO	0	Iran	IranianHO	35.585852	migrants_collected_in_Kuwait	51.459961	aadr	LazaridisNature2014
BulgarianB1.HO	0	Bulgaria	BulgarianHO	42.163403	Plovdiv	24.741211	aadr	LazaridisNature2014
lithuania9.HO	0	Lithuania	LithuanianHO	54.901882	Kaunas	23.917236	aadr	LazaridisNature2014
iran7.HO	0	Iran	Ignore_IranianHO	35.585852	migrants_collected_in_Kuwait	51.459961	aadr	LazaridisNature2014
BulgarianC1.HO	0	Bulgaria	BulgarianHO	42.163403	Plovdiv	24.741211	aadr	LazaridisNature2014
LithuanianA1.HO	0	Lithuania	LithuanianHO	54.901882	Kaunas	23.917236	aadr	LazaridisNature2014
LithuanianE2.HO	0	Lithuania	LithuanianHO	54.901882	Kaunas	23.917236	aadr	LazaridisNature2014
iran11.HO	0	Iran	IranianHO	35.585852	migrants_collected_in_Kuwait	51.459961	aadr	LazaridisNature2014
BulgarianF1.HO	0	Bulgaria	BulgarianHO	42.163403	Plovdiv	24.741211	aadr	LazaridisNature2014
lithuania1.HO	0	Lithuania	LithuanianHO	54.901882	Kaunas	23.917236	aadr	LazaridisNature2014
lithuania8.HO	0	Lithuania	LithuanianHO	54.901882	Kaunas	23.917236	aadr	LazaridisNature2014
iran16.HO	0	Iran	IranianHO	35.585852	migrants_collected_in_Kuwait	51.459961	aadr	LazaridisNature2014
BulgarianH2.HO	0	Bulgaria	BulgarianHO	42.163403	Plovdiv	24.741211	aadr	LazaridisNature2014
lithuania2.HO	0	Lithuania	LithuanianHO	54.901882	Kaunas	23.917236	aadr	LazaridisNature2014
iran17.HO	0	Iran	IranianHO	35.585852	migrants_collected_in_Kuwait	51.459961	aadr	LazaridisNature2014
BulgarianF2.HO	0	Bulgaria	BulgarianHO	42.163403	Plovdiv	24.741211	aadr	LazaridisNature2014
LithuanianD1.HO	0	Lithuania	LithuanianHO	54.901882	Kaunas	23.917236	aadr	LazaridisNature2014
mg43.HO	0	Georgia	GeorgianHO	42.5	Zugdidi_in_Megrelia	41.85	aadr	LazaridisNature2014
armenia176.HO	0	Armenia	ArmenianHO	40.193561	Yerevan	44.545441	aadr	LazaridisNature2014
mg47.HO	0	Georgia	GeorgianHO	42.5	Zugdidi_in_Megrelia	41.85	aadr	LazaridisNature2014
armenia191.HO	0	Armenia	ArmenianHO	40.193561	Yerevan	44.545441	aadr	LazaridisNature2014
mg22.HO	0	Georgia	GeorgianHO	42.5	Zugdidi_in_Megrelia	41.85	aadr	LazaridisNature2014
mg49.HO	0	Georgia	GeorgianHO	42.5	Zugdidi_in_Megrelia	41.85	aadr	LazaridisNature2014
armenia86.HO	0	Armenia	ArmenianHO	40.193561	Yerevan	44.545441	aadr	LazaridisNature2014
armenia279.HO	0	Armenia	ArmenianHO	40.193561	Yerevan	44.545441	aadr	LazaridisNature2014
mg23.HO	0	Georgia	GeorgianHO	42.5	Zugdidi_in_Megrelia	41.85	aadr	LazaridisNature2014
mg62.HO	0	Georgia	GeorgianHO	42.5	Zugdidi_in_Megrelia	41.85	aadr	LazaridisNature2014
armenia91.HO	0	Armenia	ArmenianHO	40.193561	Yerevan	44.545441	aadr	LazaridisNature2014
armenia293.HO	0	Armenia	ArmenianHO	40.193561	Yerevan	44.545441	aadr	LazaridisNature2014
mg27.HO	0	Georgia	GeorgianHO	42.5	Zugdidi_in_Megrelia	41.85	aadr	LazaridisNature2014
armenia102.HO	0	Armenia	ArmenianHO	40.193561	Yerevan	44.545441	aadr	LazaridisNature2014
mg31.HO	0	Georgia	GeorgianHO	42.5	Zugdidi_in_Megrelia	41.85	aadr	LazaridisNature2014
armenia106.HO	0	Armenia	ArmenianHO	40.193561	Yerevan	44.545441	aadr	LazaridisNature2014
mg34.HO	0	Georgia	GeorgianHO	42.5	Zugdidi_in_Megrelia	41.85	aadr	LazaridisNature2014
armenia139.HO	0	Armenia	ArmenianHO	40.193561	Yerevan	44.545441	aadr	LazaridisNature2014
mg40.HO	0	Georgia	GeorgianHO	42.5	Zugdidi_in_Megrelia	41.85	aadr	LazaridisNature2014
armenia162.HO	0	Armenia	ArmenianHO	40.193561	Yerevan	44.545441	aadr	LazaridisNature2014
bel43s.HO	0	Belarus	BelarusianHO	53.9198542	Vitebsk, Senno, Shumilino, Glubokoe, Dubrovno, Slutsk, Cherven, Kobrin	28.0119322	aadr	LazaridisNature2014
UkrLv240.HO	0	Ukraine	UkrainianHO	49.85	Lviv	24.01666667	aadr	LazaridisNature2014
Est393.HO	0	Estonia	EstonianHO	58.5390393	Parnu, Avinurme, Viljandi, Talinn	24.8892515	aadr	LazaridisNature2014
bel30s.HO	0	Belarus	BelarusianHO	53.9198542	Vitebsk, Senno, Shumilino, Glubokoe, Dubrovno, Slutsk, Cherven, Kobrin	28.0119322	aadr	LazaridisNature2014
Est375.HO	0	Estonia	EstonianHO	58.5390393	Parnu, Avinurme, Viljandi, Talinn	24.8892515	aadr	LazaridisNature2014
Est380.HO	0	Estonia	EstonianHO	58.5390393	Parnu, Avinurme, Viljandi, Talinn	24.8892515	aadr	LazaridisNature2014
bel72c.HO	0	Belarus	BelarusianHO	53.9198542	Vitebsk, Senno, Shumilino, Glubokoe, Dubrovno, Slutsk, Cherven, Kobrin	28.0119322	aadr	LazaridisNature2014
Est391.HO	0	Estonia	EstonianHO	58.5390393	Parnu, Avinurme, Viljandi, Talinn	24.8892515	aadr	LazaridisNature2014
Est377.HO	0	Estonia	EstonianHO	58.5390393	Parnu, Avinurme, Viljandi, Talinn	24.8892515	aadr	LazaridisNature2014
bel93c.HO	0	Belarus	BelarusianHO	53.9198542	Vitebsk, Senno, Shumilino, Glubokoe, Dubrovno, Slutsk, Cherven, Kobrin	28.0119322	aadr	LazaridisNature2014
Est372.HO	0	Estonia	EstonianHO	58.5390393	Parnu, Avinurme, Viljandi, Talinn	24.8892515	aadr	LazaridisNature2014
bel110c.HO	0	Belarus	BelarusianHO	53.9198542	Vitebsk, Senno, Shumilino, Glubokoe, Dubrovno, Slutsk, Cherven, Kobrin	28.0119322	aadr	LazaridisNature2014
Est358.HO	0	Estonia	EstonianHO	58.5390393	Parnu, Avinurme, Viljandi, Talinn	24.8892515	aadr	LazaridisNature2014
bel8s.HO	0	Belarus	BelarusianHO	53.9198542	Vitebsk, Senno, Shumilino, Glubokoe, Dubrovno, Slutsk, Cherven, Kobrin	28.0119322	aadr	LazaridisNature2014
belarusian23vp.HO	0	Belarus	BelarusianHO	53.9198542	Vitebsk, Senno, Shumilino, Glubokoe, Dubrovno, Slutsk, Cherven, Kobrin	28.0119322	aadr	LazaridisNature2014
Est400.HO	0	Estonia	EstonianHO	58.5390393	Parnu, Avinurme, Viljandi, Talinn	24.8892515	aadr	LazaridisNature2014
bel23s.HO	0	Belarus	BelarusianHO	53.9198542	Vitebsk, Senno, Shumilino, Glubokoe, Dubrovno, Slutsk, Cherven, Kobrin	28.0119322	aadr	LazaridisNature2014
belarusian47zp.HO	0	Belarus	BelarusianHO	53.9198542	Vitebsk, Senno, Shumilino, Glubokoe, Dubrovno, Slutsk, Cherven, Kobrin	28.0119322	aadr	LazaridisNature2014
UkrLv228.HO	0	Ukraine	UkrainianHO	49.85	Lviv	24.01666667	aadr	LazaridisNature2014
Est397.HO	0	Estonia	EstonianHO	58.5390393	Parnu, Avinurme, Viljandi, Talinn	24.8892515	aadr	LazaridisNature2014
bel82s.HO	0	Belarus	BelarusianHO	53.9198542	Vitebsk, Senno, Shumilino, Glubokoe, Dubrovno, Slutsk, Cherven, Kobrin	28.0119322	aadr	LazaridisNature2014
UkrLv237.HO	0	Ukraine	UkrainianHO	49.85	Lviv	24.01666667	aadr	LazaridisNature2014
Est394.HO	0	Estonia	EstonianHO	58.5390393	Parnu, Avinurme, Viljandi, Talinn	24.8892515	aadr	LazaridisNature2014
NA15725.HO	0	Czechoslovakia	CzechHO	50.1	Pre-1989	14.4	aadr	LazaridisNature2014
NA15733.HO	0	Czechoslovakia	CzechHO	50.1	Pre-1989	14.4	aadr	LazaridisNature2014
NA15762.HO	0	Iceland	IcelandicHO	64.13333333	..	-21.93333333	aadr	LazaridisNature2014
NA17373.HO	0	Greece	GreekHO	37.96666667	..	23.71666667	aadr	LazaridisNature2014
NA15726.HO	0	Czechoslovakia	CzechHO	50.1	Pre-1989	14.4	aadr	LazaridisNature2014
NA15755.HO	0	Iceland	IcelandicHO	64.13333333	..	-21.93333333	aadr	LazaridisNature2014
NA15763.HO	0	Iceland	IcelandicHO	64.13333333	..	-21.93333333	aadr	LazaridisNature2014
NA17374.HO	0	Greece	GreekHO	37.96666667	..	23.71666667	aadr	LazaridisNature2014
NA15727.HO	0	Czechoslovakia	CzechHO	50.1	Pre-1989	14.4	aadr	LazaridisNature2014
NA15756.HO	0	Iceland	IcelandicHO	64.13333333	..	-21.93333333	aadr	LazaridisNature2014
NA15764.HO	0	Iceland	IcelandicHO	64.13333333	..	-21.93333333	aadr	LazaridisNature2014
NA17375.HO	0	Greece	GreekHO	37.96666667	..	23.71666667	aadr	LazaridisNature2014
NA15728.HO	0	Czechoslovakia	CzechHO	50.1	Pre-1989	14.4	aadr	LazaridisNature2014
NA15757.HO	0	Iceland	IcelandicHO	64.13333333	..	-21.93333333	aadr	LazaridisNature2014
NA15765.HO	0	Iceland	IcelandicHO	64.13333333	..	-21.93333333	aadr	LazaridisNature2014
NA17376.HO	0	Greece	GreekHO	37.96666667	..	23.71666667	aadr	LazaridisNature2014
NA15729.HO	0	Czechoslovakia	CzechHO	50.1	Pre-1989	14.4	aadr	LazaridisNature2014
NA15758.HO	0	Iceland	IcelandicHO	64.13333333	..	-21.93333333	aadr	LazaridisNature2014
NA15766.HO	0	Iceland	IcelandicHO	64.13333333	..	-21.93333333	aadr	LazaridisNature2014
NA17377.HO	0	Greece	GreekHO	37.96666667	..	23.71666667	aadr	LazaridisNature2014
NA15730.HO	0	Czechoslovakia	CzechHO	50.1	Pre-1989	14.4	aadr	LazaridisNature2014
NA15759.HO	0	Iceland	IcelandicHO	64.13333333	..	-21.93333333	aadr	LazaridisNature2014
NA17370.HO	0	Greece	Ignore_GreekHO	37.96666667	..	23.71666667	aadr	LazaridisNature2014
NA15731.HO	0	Czechoslovakia	CzechHO	50.1	Pre-1989	14.4	aadr	LazaridisNature2014
NA15760.HO	0	Iceland	IcelandicHO	64.13333333	..	-21.93333333	aadr	LazaridisNature2014
NA17371.HO	0	Greece	Ignore_GreekHO	37.96666667	..	23.71666667	aadr	LazaridisNature2014
NA15724.HO	0	Czechoslovakia	CzechHO	50.1	Pre-1989	14.4	aadr	LazaridisNature2014
NA15732.HO	0	Czechoslovakia	CzechHO	50.1	Pre-1989	14.4	aadr	LazaridisNature2014
NA15761.HO	0	Iceland	IcelandicHO	64.13333333	..	-21.93333333	aadr	LazaridisNature2014
NA17372.HO	0	Greece	GreekHO	37.96666667	..	23.71666667	aadr	LazaridisNature2014
HG00103.HO	0	United Kingdom	ScottishHO	56.04	Argyll and Bute	-5.44	aadr	LazaridisNature2014
HG00104.HO	0	United Kingdom	ScottishHO	56.04	Argyll and Bute	-4.44	aadr	LazaridisNature2014
HG00105.HO	0	United Kingdom	ScottishHO	56.04	Argyll and Bute	-3.44	aadr	LazaridisNature2014
HG00106.HO	0	United Kingdom	ScottishHO	56.04	Argyll and Bute	-2.44	aadr	LazaridisNature2014
HG00128.HO	0	United Kingdom	EnglishHO	51.19	Kent	0.73	aadr	LazaridisNature2014
HG00129.HO	0	United Kingdom	EnglishHO	51.19	Kent	0.73	aadr	LazaridisNature2014
HG00130.HO	0	United Kingdom	EnglishHO	51.19	Kent	0.73	aadr	LazaridisNature2014
HG00131.HO	0	United Kingdom	EnglishHO	51.19	Kent	0.73	aadr	LazaridisNature2014
HG00233.HO	0	United Kingdom	EnglishHO	50.3	Cornwall	-4.9	aadr	LazaridisNature2014
HG00234.HO	0	United Kingdom	EnglishHO	50.3	Cornwall	-4.9	aadr	LazaridisNature2014
HG00232.HO	0	United Kingdom	EnglishHO	50.3	Cornwall	-4.9	aadr	LazaridisNature2014
HG01500.HO	0	Spain	SpanishHO	41.4	Castilla_y_Leon	-4.5	aadr	LazaridisNature2014
HG01501.HO	0	Spain	SpanishHO	41.4	Castilla_y_Leon	-4.5	aadr	LazaridisNature2014
HG01503.HO	0	Spain	SpanishHO	39.9	Castilla_la_Mancha	-4	aadr	LazaridisNature2014
HG01504.HO	0	Spain	SpanishHO	39.9	Castilla_la_Mancha	-4	aadr	LazaridisNature2014
HG01506.HO	0	Spain	SpanishHO	41.4	Castilla_y_Leon	-4.5	aadr	LazaridisNature2014
HG01507.HO	0	Spain	SpanishHO	41.4	Castilla_y_Leon	-4.5	aadr	LazaridisNature2014
HG01509.HO	0	Spain	SpanishHO	39	Extremadura	-6	aadr	LazaridisNature2014
HG01510.HO	0	Spain	SpanishHO	39	Extremadura	-6	aadr	LazaridisNature2014
HG01512.HO	0	Spain	SpanishHO	43.3	Cantabria	-4	aadr	LazaridisNature2014
HG01513.HO	0	Spain	SpanishHO	43.3	Cantabria	-4	aadr	LazaridisNature2014
HG01515.HO	0	Spain	Spanish_NorthHO	42.8	Pais Vasco	-2.7	aadr	LazaridisNature2014
HG01516.HO	0	Spain	Spanish_NorthHO	42.8	Pais Vasco	-2.7	aadr	LazaridisNature2014
HG01518.HO	0	Spain	Spanish_NorthHO	42.8	Pais Vasco	-2.7	aadr	LazaridisNature2014
HG01524.HO	0	Spain	SpanishHO	41.4	Castilla_y_Leon	-4.5	aadr	LazaridisNature2014
HG01527.HO	0	Spain	SpanishHO	39	Extremadura	-6	aadr	LazaridisNature2014
HG01528.HO	0	Spain	SpanishHO	39	Extremadura	-6	aadr	LazaridisNature2014
HG01530.HO	0	Spain	SpanishHO	39	Extremadura	-6	aadr	LazaridisNature2014
HG01536.HO	0	Spain	SpanishHO	41.8	Catalonia	1.5	aadr	LazaridisNature2014
HG01537.HO	0	Spain	SpanishHO	41.8	Catalonia	1.5	aadr	LazaridisNature2014
HG01605.HO	0	Spain	SpanishHO	39.5	Valencian Community, València	-0.4	aadr	LazaridisNature2014
HG01606.HO	0	Spain	SpanishHO	39.5	Valencian Community, València	-0.4	aadr	LazaridisNature2014
HG01607.HO	0	Spain	SpanishHO	39.5	Valencian Community, València	-0.4	aadr	LazaridisNature2014
HG01608.HO	0	Spain	SpanishHO	39.5	Valencian Community, València	-0.4	aadr	LazaridisNature2014
HG01613.HO	0	Spain	SpanishHO	39.5	Belearic Islands	3	aadr	LazaridisNature2014
HG01615.HO	0	Spain	SpanishHO	39.5	Belearic Islands	3	aadr	LazaridisNature2014
HG01617.HO	0	Spain	SpanishHO	38	Murcia	-1.1	aadr	LazaridisNature2014
HG01618.HO	0	Spain	SpanishHO	38	Murcia	-1.1	aadr	LazaridisNature2014
HG01619.HO	0	Spain	SpanishHO	37.4	Andalucia	-6	aadr	LazaridisNature2014
HG01620.HO	0	Spain	SpanishHO	37.4	Andalucia	-6	aadr	LazaridisNature2014
HG01623.HO	0	Spain	SpanishHO	37.4	Andalucia	-6	aadr	LazaridisNature2014
HG01624.HO	0	Spain	SpanishHO	37.4	Andalucia	-6	aadr	LazaridisNature2014
HG01625.HO	0	Spain	SpanishHO	39.5	Belearic Islands	3	aadr	LazaridisNature2014
HG01626.HO	0	Spain	SpanishHO	39.5	Belearic Islands	3	aadr	LazaridisNature2014
HG01630.HO	0	Spain	Ignore_SpanishHO	38	Murcia	-1.1	aadr	LazaridisNature2014
HG00171.HO	0	Finland	FinnishHO	60.2	..	24.9	aadr	LazaridisNature2014
HG00174.HO	0	Finland	FinnishHO	60.2	..	24.9	aadr	LazaridisNature2014
HG00190.HO	0	Finland	FinnishHO	60.2	..	24.9	aadr	LazaridisNature2014
HG00266.HO	0	Finland	FinnishHO	60.2	..	24.9	aadr	LazaridisNature2014
HG00231.HO	0	United Kingdom	EnglishHO	50.3	Cornwall	-4.9	aadr	LazaridisNature2014
HG00183.HO	0	Finland	FinnishHO	60.2	..	24.9	aadr	LazaridisNature2014
HG00126.HO	0	United Kingdom	EnglishHO	51.19	Kent	0.73	aadr	LazaridisNature2014
HG00173.HO	0	Finland	FinnishHO	60.2	..	24.9	aadr	LazaridisNature2014
HG00181.HO	0	Finland	FIN_oHO	60.2	..	24.9	aadr	LazaridisNature2014
HG00182.HO	0	Finland	FinnishHO	60.2	..	24.9	aadr	LazaridisNature2014
HG01747.HO	0	Spain	SpanishHO	39.9	Castilla_la_Mancha	-4	aadr	LazaridisNature2014
HG01746.HO	0	Spain	SpanishHO	39.9	Castilla_la_Mancha	-4	aadr	LazaridisNature2014
HG01675.HO	0	Spain	SpanishHO	41	Aragon	-1	aadr	LazaridisNature2014
HG01680.HO	0	Spain	SpanishHO	43.3	Cantabria	-4	aadr	LazaridisNature2014
HG01682.HO	0	Spain	SpanishHO	41	Aragon	-1	aadr	LazaridisNature2014
HG01700.HO	0	Spain	Spanish_NorthHO	42.8	Pais Vasco	-2.7	aadr	LazaridisNature2014
HG01679.HO	0	Spain	SpanishHO	43.3	Cantabria	-4	aadr	LazaridisNature2014
HG01702.HO	0	Spain	Spanish_NorthHO	42.8	Pais Vasco	-2.7	aadr	LazaridisNature2014
HG01676.HO	0	Spain	SpanishHO	41	Aragon	-1	aadr	LazaridisNature2014
HG01684.HO	0	Spain	SpanishHO	41	Aragon	-1	aadr	LazaridisNature2014
HG01705.HO	0	Spain	SpanishHO	42.5	Galicia	-8.1	aadr	LazaridisNature2014
HG01707.HO	0	Spain	SpanishHO	42.5	Galicia	-8.1	aadr	LazaridisNature2014
HG01685.HO	0	Spain	SpanishHO	42.5	Galicia	-8.1	aadr	LazaridisNature2014
HG01686.HO	0	Spain	SpanishHO	42.5	Galicia	-8.1	aadr	LazaridisNature2014
HG01704.HO	0	Spain	SpanishHO	42.5	Galicia	-8.1	aadr	LazaridisNature2014
HG01673.HO	0	Spain	SpanishHO	41	Aragon	-1	aadr	LazaridisNature2014
HG01695.HO	0	Spain	IBS_CanaryIslandsHO	28.1	Canary Islands	-15.4	aadr	LazaridisNature2014
HG01694.HO	0	Spain	IBS_CanaryIslandsHO	28.1	Canary Islands	-15.4	aadr	LazaridisNature2014
HG01761.HO	0	Spain	SpanishHO	41.8	Catalonia	1.5	aadr	LazaridisNature2014
HG01770.HO	0	Spain	SpanishHO	43.3	Cantabria	-4	aadr	LazaridisNature2014
HG01762.HO	0	Spain	SpanishHO	41.8	Catalonia	1.5	aadr	LazaridisNature2014
HG01773.HO	0	Spain	SpanishHO	39.5	Valencian Community, València	-0.4	aadr	LazaridisNature2014
HG02220.HO	0	Spain	SpanishHO	41.8	Catalonia	1.5	aadr	LazaridisNature2014
HG02238.HO	0	Spain	SpanishHO	39.9	Castilla_la_Mancha	-4	aadr	LazaridisNature2014
HG01678.HO	0	Spain	SpanishHO	41	Aragon	-1	aadr	LazaridisNature2014
HG01699.HO	0	Spain	SpanishHO	38	Murcia	-1.1	aadr	LazaridisNature2014
HG01697.HO	0	Spain	SpanishHO	38	Murcia	-1.1	aadr	LazaridisNature2014
HG00160.HO	0	United Kingdom	EnglishHO	50.3	Cornwall	-4.9	aadr	LazaridisNature2014
IranianJew1560.HO	0	Iran	Ignore_Jew_IranianHO	35.7	migrants_collected_in_Israel	51.41666667	aadr	LazaridisNature2014
CRO53.HO	0	Croatia	CroatianHO	43.513	Split	16.446	aadr	LazaridisNature2014
AshkenaziJew5779.HO	0	Poland	Jew_AshkenaziHO	52.23333333	migrants_collected_in_Israel	21.01666667	aadr	LazaridisNature2014
SephardiJewTurkey6051.HO	0	Turkey	Ignore_Jew_TurkishHO	41.01666667	migrants_collected_in_Israel	28.95	aadr	LazaridisNature2014
SephardiJewTurkey4955.HO	0	Turkey	Jew_TurkishHO	41.01666667	migrants_collected_in_Israel	28.95	aadr	LazaridisNature2014
NOR119.HO	0	Norway	NorwegianHO	60.359	Bergen	5.358	aadr	LazaridisNature2014
Balikesir16558.HO	0	Turkey	Ignore_TurkishHO	39.385	Balikesir	27.533	aadr	LazaridisNature2014
NOR124.HO	0	Norway	NorwegianHO	60.359	Bergen	5.358	aadr	LazaridisNature2014
CRO103.HO	0	Croatia	CroatianHO	43.513	Split	16.446	aadr	LazaridisNature2014
CRO107.HO	0	Croatia	CroatianHO	43.513	Split	16.446	aadr	LazaridisNature2014
SephardiJewTurkey5877.HO	0	Turkey	Jew_TurkishHO	41.01666667	migrants_collected_in_Israel	28.95	aadr	LazaridisNature2014
TP08.HO	0	Italy	SicilianHO	38.019	Trapani	12.515	aadr	LazaridisNature2014
GREEKGRALPOP18.HO	0	Greece	GreekHO	40.64	Thessaloniki	22.94	aadr	LazaridisNature2014
AshkenaziJew5782.HO	0	Poland	Jew_AshkenaziHO	52.23333333	migrants_collected_in_Israel	21.01666667	aadr	LazaridisNature2014
BEL57.HO	0	Italy	Italian_SouthHO	39.37	Belvedere (Cosenza)	15.52	aadr	LazaridisNature2014
BAS35.HO	0	Spain	BasqueHO	43.13	Tolosa	-2.08	aadr	LazaridisNature2014
SR23.HO	0	Italy	SicilianHO	37.067	Siracusa	15.267	aadr	LazaridisNature2014
CRO47.HO	0	Croatia	CroatianHO	43.513	Split	16.446	aadr	LazaridisNature2014
NOR106.HO	0	Norway	NorwegianHO	60.359	Bergen	5.358	aadr	LazaridisNature2014
CRO41.HO	0	Croatia	CroatianHO	43.513	Split	16.446	aadr	LazaridisNature2014
SephardiJewTurkey4953.HO	0	Turkey	Jew_TurkishHO	41.01666667	migrants_collected_in_Israel	28.95	aadr	LazaridisNature2014
SephardiJewTurkey6077.HO	0	Turkey	Jew_TurkishHO	41.01666667	migrants_collected_in_Israel	28.95	aadr	LazaridisNature2014
NOR101.HO	0	Norway	NorwegianHO	60.359	Bergen	5.358	aadr	LazaridisNature2014
SephardiJewTurkey5832.HO	0	Turkey	Jew_TurkishHO	41.01666667	migrants_collected_in_Israel	28.95	aadr	LazaridisNature2014
TP05.HO	0	Italy	SicilianHO	38.019	Trapani	12.515	aadr	LazaridisNature2014
Kayseri24392.HO	0	Turkey	TurkishHO	38.73333333	Kayseri	35.48333333	aadr	LazaridisNature2014
SR60.HO	0	Italy	SicilianHO	37.067	Siracusa	15.267	aadr	LazaridisNature2014
NOR146.HO	0	Norway	NorwegianHO	60.359	Bergen	5.358	aadr	LazaridisNature2014
TP06.HO	0	Italy	SicilianHO	38.019	Trapani	12.515	aadr	LazaridisNature2014
AshkenaziJew5780.HO	0	Poland	Ignore_Jew_AshkenaziHO	52.23333333	migrants_collected_in_Israel	21.01666667	aadr	LazaridisNature2014
NOR108.HO	0	Norway	NorwegianHO	60.359	Bergen	5.358	aadr	LazaridisNature2014
CRO66.HO	0	Croatia	CroatianHO	43.513	Split	16.446	aadr	LazaridisNature2014
IranianJew1409.HO	0	Iran	Jew_IranianHO	35.7	migrants_collected_in_Israel	51.41666667	aadr	LazaridisNature2014
NOR126.HO	0	Norway	NorwegianHO	60.359	Bergen	5.358	aadr	LazaridisNature2014
SephardiJewTurkey5075.HO	0	Turkey	Jew_TurkishHO	41.01666667	migrants_collected_in_Israel	28.95	aadr	LazaridisNature2014
GREEKGRALPOP13.HO	0	Greece	GreekHO	40.64	Thessaloniki	22.94	aadr	LazaridisNature2014
TP07.HO	0	Italy	SicilianHO	38.019	Trapani	12.515	aadr	LazaridisNature2014
BAS31.HO	0	Spain	BasqueHO	43.13	Tolosa	-2.08	aadr	LazaridisNature2014
ALB191.HO	0	Albania	AlbanianHO	41.33	Tirana	19.83	aadr	LazaridisNature2014
GREEKGRALPOP15.HO	0	Greece	GreekHO	40.64	Thessaloniki	22.94	aadr	LazaridisNature2014
SephardiJewTurkey4950.HO	0	Turkey	Jew_TurkishHO	41.01666667	migrants_collected_in_Israel	28.95	aadr	LazaridisNature2014
NOR107.HO	0	Norway	NorwegianHO	60.359	Bergen	5.358	aadr	LazaridisNature2014
SephardiJewTurkey5033.HO	0	Turkey	Jew_TurkishHO	41.01666667	migrants_collected_in_Israel	28.95	aadr	LazaridisNature2014
GREEKGRALPOP5.HO	0	Greece	GreekHO	40.64	Thessaloniki	22.94	aadr	LazaridisNature2014
CRO153.HO	0	Croatia	CroatianHO	43.513	Split	16.446	aadr	LazaridisNature2014
NOR109.HO	0	Norway	NorwegianHO	60.359	Bergen	5.358	aadr	LazaridisNature2014
SouthFrench3326.HO	0	France	FrenchHO	43.09	Lourdes	-0.05	aadr	LazaridisNature2014
GREEKGRALPOP9.HO	0	Greece	GreekHO	40.64	Thessaloniki	22.94	aadr	LazaridisNature2014
TP04.HO	0	Italy	SicilianHO	38.019	Trapani	12.515	aadr	LazaridisNature2014
CRO31.HO	0	Croatia	CroatianHO	43.513	Split	16.446	aadr	LazaridisNature2014
TP25.HO	0	Italy	SicilianHO	38.019	Trapani	12.515	aadr	LazaridisNature2014
GREEKGRALPOP4.HO	0	Greece	GreekHO	40.64	Thessaloniki	22.94	aadr	LazaridisNature2014
CRO93.HO	0	Croatia	CroatianHO	43.513	Split	16.446	aadr	LazaridisNature2014
SouthFrench3947.HO	0	France	FrenchHO	43.71	Dax	-1.05	aadr	LazaridisNature2014
SouthFrench1323.HO	0	France	FrenchHO	43.71	Dax	-1.05	aadr	LazaridisNature2014
SR48R.HO	0	Italy	SicilianHO	37.067	Siracusa	15.267	aadr	LazaridisNature2014
Balikesir16675.HO	0	Turkey	Turkish_BalikesirHO	39.385	Balikesir	27.533	aadr	LazaridisNature2014
SR44.HO	0	Italy	SicilianHO	37.067	Siracusa	15.267	aadr	LazaridisNature2014
SR64.HO	0	Italy	SicilianHO	37.067	Siracusa	15.267	aadr	LazaridisNature2014
NOR148.HO	0	Norway	NorwegianHO	60.359	Bergen	5.358	aadr	LazaridisNature2014
IraqiJew4061.HO	0	Iraq	Jew_IraqiHO	33.325	migrants_collected_in_Israel	44.422	aadr	LazaridisNature2014
CRO48.HO	0	Croatia	CroatianHO	43.513	Split	16.446	aadr	LazaridisNature2014
GREEKGRALPOP17.HO	0	Greece	GreekHO	40.64	Thessaloniki	22.94	aadr	LazaridisNature2014
ALB213.HO	0	Albania	AlbanianHO	41.33	Tirana	19.83	aadr	LazaridisNature2014
Turkish7BA57.HO	0	Turkey	TurkishHO	41.01	Istambul	28.98	aadr	LazaridisNature2014
BAS22.HO	0	Spain	BasqueHO	43.13	Tolosa	-2.08	aadr	LazaridisNature2014
GREEKGRALPOP16.HO	0	Greece	GreekHO	40.64	Thessaloniki	22.94	aadr	LazaridisNature2014
Balikesir16790.HO	0	Turkey	Turkish_BalikesirHO	39.385	Balikesir	27.533	aadr	LazaridisNature2014
NOR111.HO	0	Norway	NorwegianHO	60.359	Bergen	5.358	aadr	LazaridisNature2014
SouthFrench3951.HO	0	France	FrenchHO	43.71	Dax	-1.05	aadr	LazaridisNature2014
BAS25.HO	0	Spain	BasqueHO	43.13	Tolosa	-2.08	aadr	LazaridisNature2014
BAS32.HO	0	Spain	BasqueHO	43.13	Tolosa	-2.08	aadr	LazaridisNature2014
GREEKGRALPOP11.HO	0	Greece	GreekHO	40.64	Thessaloniki	22.94	aadr	LazaridisNature2014
GREEKGRALPOP10.HO	0	Greece	GreekHO	40.64	Thessaloniki	22.94	aadr	LazaridisNature2014
IraqiJew1524.HO	0	Iraq	Ignore_Jew_IraqiHO	33.325	migrants_collected_in_Israel	44.422	aadr	LazaridisNature2014
GREEKGRALPOP3.HO	0	Greece	GreekHO	40.64	Thessaloniki	22.94	aadr	LazaridisNature2014
GREEKGRALPOP8.HO	0	Greece	GreekHO	40.64	Thessaloniki	22.94	aadr	LazaridisNature2014
IranianJew1132.HO	0	Iran	Jew_IranianHO	35.7	migrants_collected_in_Israel	51.41666667	aadr	LazaridisNature2014
Turkish8BA62.HO	0	Turkey	TurkishHO	39.65	Balikesir	27.88	aadr	LazaridisNature2014
IraqiJew4077.HO	0	Iraq	Ignore_Jew_IraqiHO	33.325	migrants_collected_in_Israel	44.422	aadr	LazaridisNature2014
SouthFrench3068.HO	0	France	FrenchHO	43.09	Lourdes	-0.05	aadr	LazaridisNature2014
IraqiJew1424.HO	0	Iraq	Ignore_Jew_IraqiHO	33.325	migrants_collected_in_Israel	44.422	aadr	LazaridisNature2014
Istanbul20010.HO	0	Turkey	TurkishHO	41.01666667	Istanbul	28.95	aadr	LazaridisNature2014
BAS30.HO	0	Spain	BasqueHO	43.13	Tolosa	-2.08	aadr	LazaridisNature2014
IraqiJew4241.HO	0	Iraq	Jew_IraqiHO	33.325	migrants_collected_in_Israel	44.422	aadr	LazaridisNature2014
AshkenaziJew5783.HO	0	Poland	Jew_AshkenaziHO	52.23333333	migrants_collected_in_Israel	21.01666667	aadr	LazaridisNature2014
Turkish4BA57.HO	0	Turkey	TurkishHO	39.42	Kütahya	29.98	aadr	LazaridisNature2014
AshkenaziJew5704.HO	0	Poland	Jew_AshkenaziHO	52.23333333	migrants_collected_in_Israel	21.01666667	aadr	LazaridisNature2014
IranianJew1159.HO	0	Iran	Jew_IranianHO	35.7	migrants_collected_in_Israel	51.41666667	aadr	LazaridisNature2014
IranianJew1513.HO	0	Iran	Jew_IranianHO	35.7	migrants_collected_in_Israel	51.41666667	aadr	LazaridisNature2014
AshkenaziJew5728.HO	0	Poland	Jew_AshkenaziHO	52.23333333	migrants_collected_in_Israel	21.01666667	aadr	LazaridisNature2014
ALB202.HO	0	Albania	AlbanianHO	41.33	Tirana	19.83	aadr	LazaridisNature2014
BAS29.HO	0	Spain	Ignore_BasqueHO	43.13	Tolosa	-2.08	aadr	LazaridisNature2014
GREEKGRALPOP12.HO	0	Greece	GreekHO	40.64	Thessaloniki	22.94	aadr	LazaridisNature2014
SouthFrench1112.HO	0	France	FrenchHO	43.09	Lourdes	-0.05	aadr	LazaridisNature2014
AshkenaziJew5790.HO	0	Poland	Jew_AshkenaziHO	52.23333333	migrants_collected_in_Israel	21.01666667	aadr	LazaridisNature2014
Trabzon21529.HO	0	Turkey	Ignore_TurkishHO	41	Trabzon	39.73333333	aadr	LazaridisNature2014
GeorgianJew1607.HO	0	Georgia	Jew_GeorgianHO	41.71666667	migrants_collected_in_Israel	44.78333333	aadr	LazaridisNature2014
GeorgianJew1671.HO	0	Georgia	Jew_GeorgianHO	41.71666667	migrants_collected_in_Israel	44.78333333	aadr	LazaridisNature2014
Adana23114.HO	0	Turkey	TurkishHO	37	Adana	35.31666667	aadr	LazaridisNature2014
GREEKGRALPOP14.HO	0	Greece	GreekHO	40.64	Thessaloniki	22.94	aadr	LazaridisNature2014
IranianJew1556.HO	0	Iran	Jew_IranianHO	35.7	migrants_collected_in_Israel	51.41666667	aadr	LazaridisNature2014
Balikesir16563.HO	0	Turkey	Ignore_TurkishHO	39.385	Balikesir	27.533	aadr	LazaridisNature2014
SouthFrench4018.HO	0	France	FrenchHO	43.71	Dax	-1.05	aadr	LazaridisNature2014
Trabzon21177.HO	0	Turkey	TurkishHO	41	Trabzon	39.73333333	aadr	LazaridisNature2014
GeorgianJew1577.HO	0	Georgia	Jew_GeorgianHO	41.71666667	migrants_collected_in_Israel	44.78333333	aadr	LazaridisNature2014
BAS28.HO	0	Spain	BasqueHO	43.13	Tolosa	-2.08	aadr	LazaridisNature2014
Aydin18784.HO	0	Turkey	TurkishHO	37.85	Aydin	27.83333333	aadr	LazaridisNature2014
IraqiJew1417.HO	0	Iraq	Jew_IraqiHO	33.325	migrants_collected_in_Israel	44.422	aadr	LazaridisNature2014
Istanbul19810.HO	0	Turkey	TurkishHO	41.01666667	Istanbul	28.95	aadr	LazaridisNature2014
Trabzon21557.HO	0	Turkey	TurkishHO	41	Trabzon	39.73333333	aadr	LazaridisNature2014
IranianJew1557.HO	0	Iran	Jew_IranianHO	35.7	migrants_collected_in_Israel	51.41666667	aadr	LazaridisNature2014
GeorgianJew1971.HO	0	Georgia	Jew_GeorgianHO	41.71666667	migrants_collected_in_Israel	44.78333333	aadr	LazaridisNature2014
GeorgianJew1594.HO	0	Georgia	Jew_GeorgianHO	41.71666667	migrants_collected_in_Israel	44.78333333	aadr	LazaridisNature2014
ALB212.HO	0	Albania	AlbanianHO	41.33	Tirana	19.83	aadr	LazaridisNature2014
GeorgianJew1961.HO	0	Georgia	Ignore_Jew_GeorgianHO	41.71666667	migrants_collected_in_Israel	44.78333333	aadr	LazaridisNature2014
IraqiJew1771.HO	0	Iraq	Jew_IraqiHO	33.325	migrants_collected_in_Israel	44.422	aadr	LazaridisNature2014
ALB220.HO	0	Albania	AlbanianHO	41.33	Tirana	19.83	aadr	LazaridisNature2014
Trabzon21534.HO	0	Turkey	TurkishHO	41	Trabzon	39.73333333	aadr	LazaridisNature2014
BAS27.HO	0	Spain	BasqueHO	43.13	Tolosa	-2.08	aadr	LazaridisNature2014
Turkish9BA57.HO	0	Turkey	TurkishHO	38.42	Izmir	27.13	aadr	LazaridisNature2014
Kayseri24075.HO	0	Turkey	TurkishHO	38.73333333	Kayseri	35.48333333	aadr	LazaridisNature2014
IraqiJew4291.HO	0	Iraq	Jew_IraqiHO	33.325	migrants_collected_in_Israel	44.422	aadr	LazaridisNature2014
ALB230.HO	0	Albania	AlbanianHO	41.33	Tirana	19.83	aadr	LazaridisNature2014
AshkenaziJew5775.HO	0	Poland	Ignore_Jew_AshkenaziHO	52.23333333	migrants_collected_in_Israel	21.01666667	aadr	LazaridisNature2014
Adana23108.HO	0	Turkey	TurkishHO	37	Adana	35.31666667	aadr	LazaridisNature2014
IranianJew1143.HO	0	Iran	Jew_IranianHO	35.7	migrants_collected_in_Israel	51.41666667	aadr	LazaridisNature2014
Balikesir16887.HO	0	Turkey	Turkish_BalikesirHO	39.385	Balikesir	27.533	aadr	LazaridisNature2014
IranianJew1832.HO	0	Iran	Jew_IranianHO	35.7	migrants_collected_in_Israel	51.41666667	aadr	LazaridisNature2014
GeorgianJew1654.HO	0	Georgia	Jew_GeorgianHO	41.71666667	migrants_collected_in_Israel	44.78333333	aadr	LazaridisNature2014
BAS33.HO	0	Spain	BasqueHO	43.13	Tolosa	-2.08	aadr	LazaridisNature2014
GeorgianJew1972.HO	0	Georgia	Ignore_Jew_GeorgianHO	41.71666667	migrants_collected_in_Israel	44.78333333	aadr	LazaridisNature2014
GeorgianJew1883.HO	0	Georgia	Jew_GeorgianHO	41.71666667	migrants_collected_in_Israel	44.78333333	aadr	LazaridisNature2014
Kayseri24266.HO	0	Turkey	TurkishHO	38.73333333	Kayseri	35.48333333	aadr	LazaridisNature2014
Balikesir16653.HO	0	Turkey	Turkish_BalikesirHO	39.385	Balikesir	27.533	aadr	LazaridisNature2014
Istanbul25095.HO	0	Turkey	TurkishHO	41.01666667	Istanbul	28.95	aadr	LazaridisNature2014
Aydin18112.HO	0	Turkey	TurkishHO	37.85	Aydin	27.83333333	aadr	LazaridisNature2014
Aydin18414.HO	0	Turkey	Ignore_TurkishHO	37.85	Aydin	27.83333333	aadr	LazaridisNature2014
Kayseri24402.HO	0	Turkey	TurkishHO	38.73333333	Kayseri	35.48333333	aadr	LazaridisNature2014
Balikesir16577.HO	0	Turkey	Ignore_TurkishHO	39.385	Balikesir	27.533	aadr	LazaridisNature2014
Istanbul25081.HO	0	Turkey	TurkishHO	41.01666667	Istanbul	28.95	aadr	LazaridisNature2014
Aydin18596.HO	0	Turkey	TurkishHO	37.85	Aydin	27.83333333	aadr	LazaridisNature2014
Istanbul17778.HO	0	Turkey	TurkishHO	41.01666667	Istanbul	28.95	aadr	LazaridisNature2014
IraqiJew1430.HO	0	Iraq	Jew_IraqiHO	33.325	migrants_collected_in_Israel	44.422	aadr	LazaridisNature2014
Istanbul15781.HO	0	Turkey	TurkishHO	41.01666667	Istanbul	28.95	aadr	LazaridisNature2014
Adana23136.HO	0	Turkey	TurkishHO	37	Adana	35.31666667	aadr	LazaridisNature2014
AshkenaziJew5788.HO	0	Poland	Jew_AshkenaziHO	52.23333333	migrants_collected_in_Israel	21.01666667	aadr	LazaridisNature2014
Adana23113.HO	0	Turkey	TurkishHO	37	Adana	35.31666667	aadr	LazaridisNature2014
Trabzon21575.HO	0	Turkey	TurkishHO	41	Trabzon	39.73333333	aadr	LazaridisNature2014
Aydin18636.HO	0	Turkey	TurkishHO	37.85	Aydin	27.83333333	aadr	LazaridisNature2014
Istanbul20040.HO	0	Turkey	TurkishHO	41.01666667	Istanbul	28.95	aadr	LazaridisNature2014
Aydin18587.HO	0	Turkey	Ignore_TurkishHO	37.85	Aydin	27.83333333	aadr	LazaridisNature2014
Balikesir16837.HO	0	Turkey	Ignore_Turkish_Balikesir_PCA_outlier_vs_restHO	39.385	Balikesir	27.533	aadr	LazaridisNature2014
Adana23144.HO	0	Turkey	TurkishHO	37	Adana	35.31666667	aadr	LazaridisNature2014
Kayseri23967.HO	0	Turkey	TurkishHO	38.73333333	Kayseri	35.48333333	aadr	LazaridisNature2014
IranianJew1845.HO	0	Iran	Jew_IranianHO	35.7	migrants_collected_in_Israel	51.41666667	aadr	LazaridisNature2014
Trabzon21174.HO	0	Turkey	TurkishHO	41	Trabzon	39.73333333	aadr	LazaridisNature2014
Aydin18873.HO	0	Turkey	TurkishHO	37.85	Aydin	27.83333333	aadr	LazaridisNature2014
Kayseri23892.HO	0	Turkey	TurkishHO	38.73333333	Kayseri	35.48333333	aadr	LazaridisNature2014
Istanbul19185.HO	0	Turkey	TurkishHO	41.01666667	Istanbul	28.95	aadr	LazaridisNature2014
Istanbul25098.HO	0	Turkey	TurkishHO	41.01666667	Istanbul	28.95	aadr	LazaridisNature2014
Adana23133.HO	0	Turkey	TurkishHO	37	Adana	35.31666667	aadr	LazaridisNature2014
Aydin18948.HO	0	Turkey	Ignore_TurkishHO	37.85	Aydin	27.83333333	aadr	LazaridisNature2014
Trabzon21515.HO	0	Turkey	TurkishHO	41	Trabzon	39.73333333	aadr	LazaridisNature2014
Kayseri24032.HO	0	Turkey	TurkishHO	38.73333333	Kayseri	35.48333333	aadr	LazaridisNature2014
Kayseri23549.HO	0	Turkey	TurkishHO	38.73333333	Kayseri	35.48333333	aadr	LazaridisNature2014
Trabzon21544.HO	0	Turkey	TurkishHO	41	Trabzon	39.73333333	aadr	LazaridisNature2014
Adana23150.HO	0	Turkey	TurkishHO	37	Adana	35.31666667	aadr	LazaridisNature2014
Kayseri23271.HO	0	Turkey	TurkishHO	38.73333333	Kayseri	35.48333333	aadr	LazaridisNature2014
Trabzon21645.HO	0	Turkey	TurkishHO	41	Trabzon	39.73333333	aadr	LazaridisNature2014
Adana23147.HO	0	Turkey	TurkishHO	37	Adana	35.31666667	aadr	LazaridisNature2014
Balikesir16514.HO	0	Turkey	Ignore_TurkishHO	39.385	Balikesir	27.533	aadr	LazaridisNature2014
Aydin18483.HO	0	Turkey	TurkishHO	37.85	Aydin	27.83333333	aadr	LazaridisNature2014
Balikesir17006.HO	0	Turkey	Turkish_BalikesirHO	39.385	Balikesir	27.533	aadr	LazaridisNature2014
Aydin18419.HO	0	Turkey	TurkishHO	37.85	Aydin	27.83333333	aadr	LazaridisNature2014
Kayseri24276.HO	0	Turkey	TurkishHO	38.73333333	Kayseri	35.48333333	aadr	LazaridisNature2014
Istanbul19708.HO	0	Turkey	TurkishHO	41.01666667	Istanbul	28.95	aadr	LazaridisNature2014
Trabzon21173.HO	0	Turkey	TurkishHO	41	Trabzon	39.73333333	aadr	LazaridisNature2014
Adana23112.HO	0	Turkey	TurkishHO	37	Adana	35.31666667	aadr	LazaridisNature2014
Adana23117.HO	0	Turkey	TurkishHO	37	Adana	35.31666667	aadr	LazaridisNature2014
French23812.HO	0	France	FrenchHO	48.29879354	Finistere	-4.123009966	aadr	LazaridisNature2016
French23814.HO	0	France	FrenchHO	50.42814009	Nord	3.246792808	aadr	LazaridisNature2016
French23821.HO	0	France	FrenchHO	50.46199264	Pas-de-Calais	2.332995724	aadr	LazaridisNature2016
French23830.HO	0	France	FrenchHO	48.19258752	Ille-et-Vilaine	-1.627910464	aadr	LazaridisNature2016
French23833.HO	0	France	FrenchHO	48.29879354	Finistere	-4.123009966	aadr	LazaridisNature2016
French23862.HO	0	France	FrenchHO	50.46199264	Pas-de-Calais	2.332995724	aadr	LazaridisNature2016
French23915.HO	0	France	FrenchHO	49.67513189	Seine-Maritime	0.977685858	aadr	LazaridisNature2016
French23919.HO	0	France	FrenchHO	47.84775063	Yonne	3.592557896	aadr	LazaridisNature2016
French23952.HO	0	France	Ignore_FrenchHO	50.42814009	Nord	3.246792808	aadr	LazaridisNature2016
French23989.HO	0	France	FrenchHO	48.47465039	Cote d'Armor	-2.839401333	aadr	LazaridisNature2016
French24061.HO	0	France	FrenchHO	47.34281747	Loire-Atlantique	-1.66718251	aadr	LazaridisNature2016
French24075.HO	0	France	FrenchHO	49.0469805	Moselle	6.61545411	aadr	LazaridisNature2016
French24076.HO	0	France	FrenchHO	49.0469805	Moselle	6.61545411	aadr	LazaridisNature2016
French24090.HO	0	France	FrenchHO	48.47465039	Cote d'Armor	-2.839401333	aadr	LazaridisNature2016
French24118.HO	0	France	FrenchHO	47.37332413	Cote d'Or	4.794084373	aadr	LazaridisNature2016
French24120.HO	0	France	FrenchHO	48.29879354	Finistere	-4.123009966	aadr	LazaridisNature2016
French24124.HO	0	France	FrenchHO	49.0469805	Moselle	6.61545411	aadr	LazaridisNature2016
French24144.HO	0	France	FrenchHO	50.42814009	Nord	3.246792808	aadr	LazaridisNature2016
French24148.HO	0	France	FrenchHO	49.0469805	Moselle	6.61545411	aadr	LazaridisNature2016
French24178.HO	0	France	FrenchHO	49.0469805	Moselle	6.61545411	aadr	LazaridisNature2016
French24247.HO	0	France	FrenchHO	48.47465039	Cote d'Armor	-2.839401333	aadr	LazaridisNature2016
French24381.HO	0	France	FrenchHO	48.29879354	Finistere	-4.123009966	aadr	LazaridisNature2016
French24400.HO	0	France	FrenchHO	48.29879354	Finistere	-4.123009966	aadr	LazaridisNature2016
French24408.HO	0	France	FrenchHO	49.67513189	Seine-Maritime	0.977685858	aadr	LazaridisNature2016
French24433.HO	0	France	FrenchHO	49.0469805	Moselle	6.61545411	aadr	LazaridisNature2016
French24434.HO	0	France	FrenchHO	49.0469805	Moselle	6.61545411	aadr	LazaridisNature2016
French24437.HO	0	France	FrenchHO	49.0469805	Moselle	6.61545411	aadr	LazaridisNature2016
French24690.HO	0	France	FrenchHO	50.46199264	Pas-de-Calais	2.332995724	aadr	LazaridisNature2016
French24817.HO	0	France	FrenchHO	49.54835727	Aisne	3.529341431	aadr	LazaridisNature2016
French25068.HO	0	France	FrenchHO	50.46199264	Pas-de-Calais	2.332995724	aadr	LazaridisNature2016
PV001.HO	0	Iran	Iranian_BandariHO	27.183	Bandar Abbas / Hormozgan	56.267	aadr	LazaridisNature2016
PV002.HO	0	Iran	Iranian_BandariHO	27.183	Bandar Abbas / Hormozgan	56.267	aadr	LazaridisNature2016
PV003.HO	0	Iran	Iranian_BandariHO	27.183	Bandar Abbas / Hormozgan	56.267	aadr	LazaridisNature2016
PV004.HO	0	Iran	Iranian_BandariHO	27.183	Bandar Abbas / Hormozgan	56.267	aadr	LazaridisNature2016
PV005.HO	0	Iran	Iranian_BandariHO	27.183	Bandar Abbas / Hormozgan	56.267	aadr	LazaridisNature2016
PV006.HO	0	Iran	Iranian_BandariHO	27.183	Bandar Abbas / Hormozgan	56.267	aadr	LazaridisNature2016
PV007.HO	0	Iran	Iranian_BandariHO	27.183	Bandar Abbas / Hormozgan	56.267	aadr	LazaridisNature2016
PV008.HO	0	Iran	Iranian_BandariHO	27.183	Bandar Abbas / Hormozgan	56.267	aadr	LazaridisNature2016
PV019.HO	0	Iran	IranianHO	36.529	Babol / Mazandaran / Mazandarani	52.671	aadr	LazaridisNature2016
PV020.HO	0	Iran	IranianHO	36.529	Babol / Mazandaran / Mazandarani	52.671	aadr	LazaridisNature2016
PV021.HO	0	Iran	IranianHO	36.529	Babol / Mazandaran / Mazandarani	52.671	aadr	LazaridisNature2016
PV022.HO	0	Iran	IranianHO	36.529	Babol / Mazandaran / Mazandarani	52.671	aadr	LazaridisNature2016
PV023.HO	0	Iran	IranianHO	36.529	Babol / Mazandaran / Mazandarani	52.671	aadr	LazaridisNature2016
PV024.HO	0	Iran	IranianHO	36.529	Babol / Mazandaran / Mazandarani	52.671	aadr	LazaridisNature2016
PV025.HO	0	Iran	IranianHO	36.529	Babol / Mazandaran / Mazandarani	52.671	aadr	LazaridisNature2016
PV026.HO	0	Iran	IranianHO	36.529	Babol / Mazandaran / Mazandarani	52.671	aadr	LazaridisNature2016
PV027.HO	0	Iran	IranianHO	36.529	Babol / Mazandaran / Mazandarani	52.671	aadr	LazaridisNature2016
PV028.HO	0	Iran	IranianHO	36.529	Babol / Mazandaran / Mazandarani	52.671	aadr	LazaridisNature2016
ITS2.HO	0	Italy	Ignore_Italian_South_1drelHO	40.51	Naples	16.55	aadr	LazaridisNature2016
ITS4.HO	0	Italy	Italian_SouthHO	40.68	Naples	14.77	aadr	LazaridisNature2016
ITS5.HO	0	Italy	Italian_SouthHO	40.39	Salerno	16.55	aadr	LazaridisNature2016
ITS7.HO	0	Italy	Italian_SouthHO	40.85	Crispiano	14.27	aadr	LazaridisNature2016
PV009.HO	0	Iran	IranianHO	33.465	Khoramabad / Lorestan / Lori	48.339	aadr	LazaridisNature2016
PV010.HO	0	Iran	IranianHO	33.465	Khoramabad / Lorestan / Lori	48.339	aadr	LazaridisNature2016
PV011.HO	0	Iran	IranianHO	33.465	Khoramabad / Lorestan / Lori	48.339	aadr	LazaridisNature2016
PV012.HO	0	Iran	IranianHO	33.465	Khoramabad / Lorestan / Lori	48.339	aadr	LazaridisNature2016
PV013.HO	0	Iran	IranianHO	33.465	Khoramabad / Lorestan / Lori	48.339	aadr	LazaridisNature2016
PV014.HO	0	Iran	IranianHO	33.465	Khoramabad / Lorestan / Lori	48.339	aadr	LazaridisNature2016
PV015.HO	0	Iran	IranianHO	33.465	Khoramabad / Lorestan / Lori	48.339	aadr	LazaridisNature2016
PV016.HO	0	Iran	IranianHO	33.465	Khoramabad / Lorestan / Lori	48.339	aadr	LazaridisNature2016
PV017.HO	0	Iran	IranianHO	33.465	Khoramabad / Lorestan / Lori	48.339	aadr	LazaridisNature2016
PV018.HO	0	Iran	IranianHO	33.465	Khoramabad / Lorestan / Lori	48.339	aadr	LazaridisNature2016
PV029.HO	0	Iran	IranianHO	29.591	Shiraz / Fars / Persian	52.584	aadr	LazaridisNature2016
PV030.HO	0	Iran	IranianHO	29.591	Shiraz / Fars / Persian	52.584	aadr	LazaridisNature2016
PV031.HO	0	Iran	IranianHO	29.591	Shiraz / Fars / Persian	52.584	aadr	LazaridisNature2016
PV032.HO	0	Iran	IranianHO	29.591	Shiraz / Fars / Persian	52.584	aadr	LazaridisNature2016
PV033.HO	0	Iran	IranianHO	29.591	Shiraz / Fars / Persian	52.584	aadr	LazaridisNature2016
PV034.HO	0	Iran	IranianHO	29.591	Shiraz / Fars / Persian	52.584	aadr	LazaridisNature2016
PV035.HO	0	Iran	IranianHO	29.591	Shiraz / Fars / Persian	52.584	aadr	LazaridisNature2016
PV036.HO	0	Iran	IranianHO	29.591	Shiraz / Fars / Persian	52.584	aadr	LazaridisNature2016
PV037.HO	0	Iran	IranianHO	29.591	Shiraz / Fars / Persian	52.584	aadr	LazaridisNature2016
PV038.HO	0	Iran	IranianHO	29.591	Shiraz / Fars / Persian	52.584	aadr	LazaridisNature2016
A306.HO	0	Romania	RomanianHO	46.502222	Apuseni mountains, Horea village	22.950277	aadr	LazaridisNature2016
A325.HO	0	Romania	RomanianHO	46.502222	Apuseni mountains, Horea village	22.950277	aadr	LazaridisNature2016
A343.HO	0	Romania	RomanianHO	46.502222	Apuseni mountains, Horea village	22.950277	aadr	LazaridisNature2016
A362.HO	0	Romania	RomanianHO	46.502222	Apuseni mountains, Horea village	22.950277	aadr	LazaridisNature2016
A374.HO	0	Romania	RomanianHO	46.502222	Apuseni mountains, Horea village	22.950277	aadr	LazaridisNature2016
Assyrian151.HO	0	Turkey	AssyrianHO	37.47	Jilu, Hakkâri	43.94	aadr	LazaridisNature2016
Assyrian152.HO	0	Turkey	AssyrianHO	37.28	Çukurca, Hakkâri	43.54	aadr	LazaridisNature2016
Assyrian153.HO	0	Turkey	AssyrianHO	37.56	Gawar, Hakkâri	44.28	aadr	LazaridisNature2016
Assyrian155.HO	0	Iraq	AssyrianHO	36.34	Mosul	43.13	aadr	LazaridisNature2016
Assyrian159.HO	0	Iraq	AssyrianHO	37.1	Bibad, Amadiya	43.45	aadr	LazaridisNature2016
Assyrian160.HO	0	Iran	AssyrianHO	37.51	Gug Tappeh, Urmia	45.14	aadr	LazaridisNature2016
Assyrian161.HO	0	Iran	AssyrianHO	37.7	Adeh, Urmia	45.18	aadr	LazaridisNature2016
Assyrian162.HO	0	Iraq	AssyrianHO	36.4	Shaqlawa, Erbil	44.32	aadr	LazaridisNature2016
Assyrian163.HO	0	Turkey	AssyrianHO	37.56	Gawar, Hakkâri	44.28	aadr	LazaridisNature2016
Assyrian164.HO	0	Iran	AssyrianHO	37.54	Urmia	45.06	aadr	LazaridisNature2016
Assyrian165.HO	0	Turkey	AssyrianHO	37.47	Jilu, Hakkâri	43.94	aadr	LazaridisNature2016
G408.HO	0	Romania	RomanianHO	45.050555	Gorj county, Tismana village	22.948888	aadr	LazaridisNature2016
G421.HO	0	Romania	RomanianHO	45.050555	Gorj county, Tismana village	22.948888	aadr	LazaridisNature2016
G428.HO	0	Romania	RomanianHO	45.050555	Gorj county, Tismana village	22.948888	aadr	LazaridisNature2016
G429.HO	0	Romania	RomanianHO	45.050555	Gorj county, Tismana village	22.948888	aadr	LazaridisNature2016
G434.HO	0	Romania	RomanianHO	45.050555	Gorj county, Tismana village	22.948888	aadr	LazaridisNature2016
HGDP00521_WGA.HO	0	France	Ignore_French_discoveryHO	46	..	2	aadr	PattersonGenetics2012
HGDP00665_WGA.HO	0	Italy	Ignore_Italian_Sardinian_discoveryHO	40	..	9	aadr	PattersonGenetics2012
ALB126.HO	0	Spain	SpanishHO	39.57764065	Valencian Community, València	-0.435621325	aadr	BiaginiEJHG2019
ALB231.HO	0	Spain	SpanishHO	40.33030073	Valencian Community, Castelló	-0.09371245	aadr	BiaginiEJHG2019
ALB389.HO	0	Spain	SpanishHO	39.1212219	Valencian Community, València	-0.4496824	aadr	BiaginiEJHG2019
ALE005.HO	0	Spain	SpanishHO	38.83272885	Valencian Community, Alacant	-0.1698875	aadr	BiaginiEJHG2019
ALE009.HO	0	Spain	SpanishHO	38.80177285	Valencian Community, Alacant	-0.10024795	aadr	BiaginiEJHG2019
ALE088.HO	0	Spain	SpanishHO	41.5312599	Catalonia, Penedès	1.6234864	aadr	BiaginiEJHG2019
ALE339.HO	0	Spain	SpanishHO	39.5745	Balearic Islands, Eivissa	2.4202	aadr	BiaginiEJHG2019
ARM005.HO	0	Spain	SpanishHO	41.3911279	Catalonia, Peri-Barcelona	2.0096085	aadr	BiaginiEJHG2019
BON076.HO	0	Spain	SpanishHO	39.4702393	Valencian Community, València	-0.3768049	aadr	BiaginiEJHG2019
BOS010.HO	0	Spain	SpanishHO	39.49645008	Valencian Community, València	-0.745200625	aadr	BiaginiEJHG2019
BOS011.HO	0	Spain	SpanishHO	42.32316545	Catalonia, Girona	2.949388975	aadr	BiaginiEJHG2019
BOS015.HO	0	Spain	SpanishHO	41.2347823	Catalonia, Penedès	1.8112222	aadr	BiaginiEJHG2019
BOS027.HO	0	Spain	SpanishHO	40.0727808	Valencian Community, Castelló	-0.2130235	aadr	BiaginiEJHG2019
BOS029.HO	0	Spain	SpanishHO	41.3473838	Catalonia, Peri-Barcelona	2.0431027	aadr	BiaginiEJHG2019
CAL026.HO	0	Spain	SpanishHO	39.552725	Balearic Islands, Eivissa	2.594625	aadr	BiaginiEJHG2019
CAL053.HO	0	Spain	SpanishHO	41.5465254	Catalonia, Peri-Barcelona	2.42292105	aadr	BiaginiEJHG2019
CAL107.HO	0	Spain	SpanishHO	41.73529543	Catalonia, Catalunya Central	1.784768875	aadr	BiaginiEJHG2019
CAR007.HO	0	Spain	SpanishHO	41.9955623	Catalonia, Catalunya Central	1.5043715	aadr	BiaginiEJHG2019
CAR016.HO	0	Spain	SpanishHO	42.39928083	Catalonia, Pirineu	1.0208105	aadr	BiaginiEJHG2019
CAR023.HO	0	Spain	SpanishHO	40.6029483	Valencian Community, Castelló	0.0462348	aadr	BiaginiEJHG2019
CAR048.HO	0	Spain	SpanishHO	42.00159935	Catalonia, Catalunya Central	1.54158685	aadr	BiaginiEJHG2019
CAR200.HO	0	Spain	SpanishHO	40.61300903	Valencian Community, Castelló	0.176968125	aadr	BiaginiEJHG2019
CAR212.HO	0	Spain	SpanishHO	42.30008025	Catalonia, Pirineu	0.93614125	aadr	BiaginiEJHG2019
CAR256.HO	0	Spain	SpanishHO	38.9488625	Balearic Islands, Eivissa	1.392643375	aadr	BiaginiEJHG2019
CAR257.HO	0	Spain	SpanishHO	38.7162314	Valencian Community, Alacant	0.0533722	aadr	BiaginiEJHG2019
COD068.HO	0	Spain	SpanishHO	42.00558963	Catalonia, Catalunya Central	2.22133985	aadr	BiaginiEJHG2019
COD147.HO	0	Spain	SpanishHO	41.387917	Catalonia, Barcelonès	2.1699187	aadr	BiaginiEJHG2019
COM032.HO	0	Spain	SpanishHO	41.5375002	Catalonia, Peri-Barcelona	2.4452776	aadr	BiaginiEJHG2019
DAN072.HO	0	Spain	SpanishHO	42.2629682	Catalonia, Girona	3.174805	aadr	BiaginiEJHG2019
EST038.HO	0	Spain	SpanishHO	38.92197765	Valencian Community, València	-0.2224925	aadr	BiaginiEJHG2019
EST093.HO	0	Spain	SpanishHO	38.85261198	Valencian Community, València	-0.644794725	aadr	BiaginiEJHG2019
FER007.HO	0	Spain	SpanishHO	41.5641085	Catalonia, Lleida	1.1844278	aadr	BiaginiEJHG2019
FER015.HO	0	Spain	SpanishHO	41.5481058	Catalonia, Lleida	0.8254097	aadr	BiaginiEJHG2019
FER023.HO	0	Spain	SpanishHO	41.61102005	Catalonia, Penedès	1.5931399	aadr	BiaginiEJHG2019
FER033.HO	0	Spain	SpanishHO	40.61384735	Valencian Community, Castelló	0.252883025	aadr	BiaginiEJHG2019
FER039.HO	0	Spain	SpanishHO	41.1548179	Catalonia, Camp de Tarragona	1.108676	aadr	BiaginiEJHG2019
FER052.HO	0	Spain	SpanishHO	41.85361578	Catalonia, Girona	2.815317175	aadr	BiaginiEJHG2019
FER054.HO	0	Spain	SpanishHO	40.0015	Balearic Islands, Eivissa	3.8375	aadr	BiaginiEJHG2019
FER097.HO	0	Spain	SpanishHO	39.5264177	Valencian Community, València	-0.352794325	aadr	BiaginiEJHG2019
FER101.HO	0	Spain	SpanishHO	42.57829245	Catalonia, Pirineu	1.09993805	aadr	BiaginiEJHG2019
FOR066.HO	0	Spain	SpanishHO	41.88157083	Catalonia, Lleida	0.7313381	aadr	BiaginiEJHG2019
FOR067.HO	0	Spain	SpanishHO	41.1386105	Catalonia, Camp de Tarragona	1.0558138	aadr	BiaginiEJHG2019
FOR094.HO	0	Spain	SpanishHO	41.1676826	Catalonia, Camp de Tarragona	0.9759995	aadr	BiaginiEJHG2019
GRA011.HO	0	Spain	SpanishHO	41.37014875	Catalonia, Camp de Tarragona	1.321106425	aadr	BiaginiEJHG2019
GRA016.HO	0	Spain	SpanishHO	39.0716675	Valencian Community, València	-0.2677154	aadr	BiaginiEJHG2019
GRA020.HO	0	Spain	SpanishHO	40.544838	Catalonia, Terres de l'Ebre	0.4811905	aadr	BiaginiEJHG2019
GRA029.HO	0	Spain	SpanishHO	42.34990733	Catalonia, Pirineu	1.675218925	aadr	BiaginiEJHG2019
GRA035.HO	0	Spain	SpanishHO	41.3861732	Catalonia, Camp de Tarragona	1.088402125	aadr	BiaginiEJHG2019
GRA135.HO	0	Spain	SpanishHO	39.5999	Balearic Islands, Eivissa	2.9594	aadr	BiaginiEJHG2019
GUL190.HO	0	Spain	SpanishHO	41.1445142	Catalonia, Camp de Tarragona	1.3971	aadr	BiaginiEJHG2019
GUS007.HO	0	Spain	SpanishHO	40.0015	Balearic Islands, Eivissa	3.8375	aadr	BiaginiEJHG2019
GUS008.HO	0	Spain	SpanishHO	40.82039335	Catalonia, Terres de l'Ebre	0.498305125	aadr	BiaginiEJHG2019
GUS014.HO	0	Spain	SpanishHO	41.55705483	Catalonia, Lleida	1.0221641	aadr	BiaginiEJHG2019
GUS029.HO	0	Spain	SpanishHO	41.37268315	Catalonia, Penedès	1.94773465	aadr	BiaginiEJHG2019
GUS036.HO	0	Spain	SpanishHO	41.5404466	Catalonia, Lleida	0.9184976	aadr	BiaginiEJHG2019
GUS040.HO	0	Spain	SpanishHO	41.387917	Catalonia, Barcelonès	2.1699187	aadr	BiaginiEJHG2019
GUS119.HO	0	Spain	SpanishHO	41.387917	Catalonia, Barcelonès	2.1699187	aadr	BiaginiEJHG2019
GUS199.HO	0	Spain	SpanishHO	39.03352	Balearic Islands, Eivissa	1.564958	aadr	BiaginiEJHG2019
GUS202.HO	0	Spain	SpanishHO	41.41158328	Catalonia, Camp de Tarragona	1.168242775	aadr	BiaginiEJHG2019
GUS203.HO	0	Spain	SpanishHO	38.9853	Balearic Islands, Eivissa	1.535	aadr	BiaginiEJHG2019
MAS003.HO	0	Spain	SpanishHO	41.74347858	Catalonia, Catalunya Central	1.856196	aadr	BiaginiEJHG2019
MAS016.HO	0	Spain	SpanishHO	41.54621708	Catalonia, Peri-Barcelona	2.45454985	aadr	BiaginiEJHG2019
MAS064.HO	0	Spain	SpanishHO	38.16575973	Valencian Community, Alacant	-0.57921845	aadr	BiaginiEJHG2019
MAY035.HO	0	Spain	SpanishHO	39.7195	Balearic Islands, Eivissa	2.9079	aadr	BiaginiEJHG2019
MEL022.HO	0	Spain	SpanishHO	39.649425	Balearic Islands, Eivissa	3.299225	aadr	BiaginiEJHG2019
MIQ133.HO	0	Spain	SpanishHO	41.66488053	Catalonia, Lleida	0.987945675	aadr	BiaginiEJHG2019
MOR061.HO	0	Spain	SpanishHO	41.8480057	Catalonia, Girona	2.5126261	aadr	BiaginiEJHG2019
MOR068.HO	0	Spain	SpanishHO	41.6519419	Catalonia, Peri-Barcelona	2.34427665	aadr	BiaginiEJHG2019
MST073.HO	0	Spain	SpanishHO	39.5698	Balearic Islands, Eivissa	3.2095	aadr	BiaginiEJHG2019
MST075.HO	0	Spain	SpanishHO	41.487304	Catalonia, Lleida	0.84277285	aadr	BiaginiEJHG2019
NAC135.HO	0	Spain	SpanishHO	38.77329623	Valencian Community, Alacant	-0.521809125	aadr	BiaginiEJHG2019
PIT001.HO	0	Spain	SpanishHO	40.074546	Valencian Community, Castelló	-0.03737205	aadr	BiaginiEJHG2019
PON058.HO	0	Spain	SpanishHO	39.9734	Balearic Islands, Eivissa	3.943425	aadr	BiaginiEJHG2019
RAG111.HO	0	Spain	SpanishHO	40.5973626	Catalonia, Terres de l'Ebre	0.4428432	aadr	BiaginiEJHG2019
REI087.HO	0	Spain	SpanishHO	42.22501618	Catalonia, Girona	2.439316825	aadr	BiaginiEJHG2019
RIC076.HO	0	Spain	SpanishHO	41.7093625	Catalonia, Lleida	1.029274175	aadr	BiaginiEJHG2019
RIC106.HO	0	Spain	SpanishHO	41.4823096	Catalonia, Peri-Barcelona	2.1885045	aadr	BiaginiEJHG2019
ROB016.HO	0	Spain	SpanishHO	41.25036043	Catalonia, Penedès	1.76295515	aadr	BiaginiEJHG2019
ROB116.HO	0	Spain	SpanishHO	42.104808	Catalonia, Girona	2.779495	aadr	BiaginiEJHG2019
ROB127.HO	0	Spain	SpanishHO	41.78068935	Catalonia, Girona	2.8353168	aadr	BiaginiEJHG2019
ROI027.HO	0	Spain	SpanishHO	42.2562861	Catalonia, Girona	3.08643995	aadr	BiaginiEJHG2019
ROI042.HO	0	Spain	SpanishHO	41.4746738	Catalonia, Peri-Barcelona	1.9814068	aadr	BiaginiEJHG2019
ROI096.HO	0	Spain	SpanishHO	39.5156	Balearic Islands, Eivissa	3.0239	aadr	BiaginiEJHG2019
ROS005.HO	0	Spain	Spanish_LleidaHO	41.8249586	Catalonia, Lleida	0.99327215	aadr	BiaginiEJHG2019
ROS008.HO	0	Spain	SpanishHO	41.34692385	Catalonia, Peri-Barcelona	2.0381046	aadr	BiaginiEJHG2019
ROS025.HO	0	Spain	SpanishHO	41.4833333	Catalonia, Penedès	1.6166667	aadr	BiaginiEJHG2019
SAB009.HO	0	Spain	SpanishHO	41.0026734	Catalonia, Terres de l'Ebre	0.6005385	aadr	BiaginiEJHG2019
SAB014.HO	0	Spain	SpanishHO	41.45572238	Catalonia, Penedès	1.753688525	aadr	BiaginiEJHG2019
SAB019.HO	0	Spain	SpanishHO	39.8898705	Valencian Community, Castelló	-0.0836936	aadr	BiaginiEJHG2019
SAB131.HO	0	Spain	SpanishHO	40.9064279	Catalonia, Terres de l'Ebre	0.4906173	aadr	BiaginiEJHG2019
SAB137.HO	0	Spain	SpanishHO	42.3088425	Catalonia, Pirineu	0.97092275	aadr	BiaginiEJHG2019
SER011.HO	0	Spain	SpanishHO	42.35558353	Catalonia, Pirineu	1.76142365	aadr	BiaginiEJHG2019
SER015.HO	0	Spain	SpanishHO	41.387917	Catalonia, Barcelonès	2.1699187	aadr	BiaginiEJHG2019
SER018.HO	0	Spain	SpanishHO	42.1821095	Catalonia, Girona	2.488189	aadr	BiaginiEJHG2019
SER022.HO	0	Spain	SpanishHO	41.5266193	Catalonia, Penedès	1.72152915	aadr	BiaginiEJHG2019
SER027.HO	0	Spain	SpanishHO	41.5555506	Catalonia, Peri-Barcelona	2.4005645	aadr	BiaginiEJHG2019
SER064.HO	0	Spain	SpanishHO	38.7055	Balearic Islands, Eivissa	1.4283	aadr	BiaginiEJHG2019
SLA017.HO	0	Spain	SpanishHO	38.3928871	Valencian Community, Alacant	-0.8043802	aadr	BiaginiEJHG2019
SLM078.HO	0	Spain	SpanishHO	39.660875	Balearic Islands, Eivissa	3.08345	aadr	BiaginiEJHG2019
SOL051.HO	0	Spain	SpanishHO	41.7656289	Catalonia, Catalunya Central	1.7633848	aadr	BiaginiEJHG2019
SOL053.HO	0	Spain	SpanishHO	39.7609	Balearic Islands, Eivissa	3.032225	aadr	BiaginiEJHG2019
SOL083.HO	0	Spain	SpanishHO	41.9804394	Catalonia, Catalunya Central	1.7832034	aadr	BiaginiEJHG2019
SOL084.HO	0	Spain	SpanishHO	38.9549168	Valencian Community, València	-0.4560306	aadr	BiaginiEJHG2019
STC091.HO	0	Spain	SpanishHO	41.4638322	Catalonia, Penedès	1.6664617	aadr	BiaginiEJHG2019
VID003.HO	0	Spain	SpanishHO	41.2399203	Catalonia, Penedès	1.5772767	aadr	BiaginiEJHG2019
VID014.HO	0	Spain	SpanishHO	41.450137	Catalonia, Barcelonès	2.2474195	aadr	BiaginiEJHG2019
VID016.HO	0	Spain	SpanishHO	42.0071811	Catalonia, Girona	2.7046577	aadr	BiaginiEJHG2019
VID037.HO	0	Spain	SpanishHO	41.7060846	Catalonia, Penedès	1.486515625	aadr	BiaginiEJHG2019
VID044.HO	0	Spain	SpanishHO	42.33114798	Catalonia, Catalunya Central	2.226202925	aadr	BiaginiEJHG2019
VID048.HO	0	Spain	SpanishHO	41.1109501	Catalonia, Camp de Tarragona	1.1450011	aadr	BiaginiEJHG2019
VID057.HO	0	Spain	SpanishHO	41.91360585	Catalonia, Catalunya Central	1.8891236	aadr	BiaginiEJHG2019
EIV009_2.HO	0	Spain	SpanishHO	38.7055	Balearic Islands, Eivissa	1.4283	aadr	BiaginiEJHG2019
EIV010_2.HO	0	Spain	SpanishHO	38.7055	Balearic Islands, Eivissa	1.4283	aadr	BiaginiEJHG2019
EIV011_2.HO	0	Spain	SpanishHO	38.7055	Balearic Islands, Eivissa	1.4283	aadr	BiaginiEJHG2019
EIV001_2.HO	0	Spain	SpanishHO	38.7055	Balearic Islands, Eivissa	1.4283	aadr	BiaginiEJHG2019
EIV004_2.HO	0	Spain	SpanishHO	38.7055	Balearic Islands, Eivissa	1.4283	aadr	BiaginiEJHG2019
EIV012_2.HO	0	Spain	SpanishHO	38.7055	Balearic Islands, Eivissa	1.4283	aadr	BiaginiEJHG2019
EIV013_2.HO	0	Spain	SpanishHO	38.7055	Balearic Islands, Eivissa	1.4283	aadr	BiaginiEJHG2019
EIV014_2.HO	0	Spain	SpanishHO	38.7055	Balearic Islands, Eivissa	1.4283	aadr	BiaginiEJHG2019
EIV015_2.HO	0	Spain	SpanishHO	38.7055	Balearic Islands, Eivissa	1.4283	aadr	BiaginiEJHG2019
I13833	325	Albania	Albania_EarlyModern_oCaucasus	40.625278	Barç (Southeast, Korça Basin)	20.801111	aadr	LazaridisAlpaslanRoodenbergScience2022
I16326	2625	Czech Republic	Czech_IA_Hallstatt	50.291389	NW Bohemia, Louny, Stradonice	14.045556	aadr	PattersonNature2021
I2446	4215	United Kingdom	England_BellBeaker_highWHG	51.7977	England, Oxfordshire, Yarnton	-1.313464	aadr	PattersonNature2021 (higher coverage of previously published individual in OlaldeNature2018)
I6441	3300	Iraq	Iraq_PPNA_contam	36.716667	Nemrik 9	42.85	aadr	LazaridisAlpaslanRoodenbergScience2022
I13778	3234	Montenegro	Montenegro_MLBA	42.366667	Velika Gruda	18.733333	aadr	LazaridisAlpaslanRoodenbergScience2022
I1099	8300	Turkey	Turkey_N	40.3037	Barcın (Northwest Anatolia, Marmara)	29.57	aadr	MathiesonNature2015
I1102	8300	Turkey	Turkey_N	40.3037	Barcın (Northwest Anatolia, Marmara)	29.57	aadr	MathiesonNature2015
I1103	8300	Turkey	Turkey_N	40.3037	Barcın (Northwest Anatolia, Marmara)	29.57	aadr	MathiesonNature2015
I14688	2450	Albania	Albania_BA_IA	42.020556	Çinamak (Norteastern, Kukes District)	20.388611	aadr	LazaridisAlpaslanRoodenbergScience2022
I14690	3000	Albania	Albania_BA_IA	42.020556	Çinamak (Norteastern, Kukes District)	20.388611	aadr	LazaridisAlpaslanRoodenbergScience2022
I14692	2900	Albania	Albania_BA_IA	42.020556	Çinamak (Norteastern, Kukes District)	20.388611	aadr	LazaridisAlpaslanRoodenbergScience2022
I16251	2500	Albania	Albania_BA_IA	42.020556	Çinamak (Norteastern, Kukes District)	20.388611	aadr	LazaridisAlpaslanRoodenbergScience2022
I14689	4505	Albania	Albania_EBA_o1	42.020556	Çinamak (Norteastern, Kukes District)	20.388611	aadr	LazaridisAlpaslanRoodenbergScience2022
I16253	2426	Albania	Albania_IA	42.020556	Çinamak (Norteastern, Kukes District)	20.388611	aadr	LazaridisAlpaslanRoodenbergScience2022
I13835	246	Albania	Albania_EarlyModern_oCaucasus	40.625278	Barç (Southeast, Korça Basin)	20.801111	aadr	LazaridisAlpaslanRoodenbergScience2022
I13838	6200	Albania	Albania_LN_C	40.671111	Tren cave (Southeast , Devoll area)	20.984722	aadr	LazaridisAlpaslanRoodenbergScience2022
I13840	6102	Albania	Albania_LN_C	40.671111	Tren Cave (Southeast , Devoll area)	20.984722	aadr	LazaridisAlpaslanRoodenbergScience2022
I13839	1014	Albania	Albania_Medieval	40.432222	Shtikë (Southeastern, Kolonja Plateau)	20.712778	aadr	LazaridisAlpaslanRoodenbergScience2022
I14622	1121	Albania	Albania_Medieval	42.036944	Kënetë (Norteastern, Kukes District)	20.397222	aadr	LazaridisAlpaslanRoodenbergScience2022
I14685	400	Albania	Albania_Modern	42.12	Bardhoc (Norteastern, Kukes District)	20.518056	aadr	LazaridisAlpaslanRoodenbergScience2022
I15706	320	Albania	Albania_Modern	40.998333	Pazhok (Central)	19.8325	aadr	LazaridisAlpaslanRoodenbergScience2022
I14686	400	Albania	Albania_Modern_oCaucasus	42.12	Bardhoc (Northeastern, Kukes District)	20.518056	aadr	LazaridisAlpaslanRoodenbergScience2022
I14687	400	Albania	Albania_Modern_oCaucasus	42.12	Bardhoc (Norteastern, Kukes District)	20.518056	aadr	LazaridisAlpaslanRoodenbergScience2022
I15707	399	Albania	Albania_Modern_oCaucasus	42.12	Bardhoc (Northeastern, Kukes District),	20.518056	aadr	LazaridisAlpaslanRoodenbergScience2022
S_Albanian-1.DG	0	Albania	AlbanianDG	41.33	Tirana	19.83	aadr	MallickNature2016
I16119	2286	Armenia	Armenia_Achaemenid_Hellenistic	40.15118	Karmir Blur, necropolis of Teishebaini	44.44316667	aadr	LazaridisAlpaslanRoodenbergScience2022
I1407	5875	Armenia	Armenia_C	39.73	Areni 1	45.2	aadr	LazaridisNature2016
I1631	6099	Armenia	Armenia_C	39.73	Areni 1	45.2	aadr	LazaridisNature2016
I1632	6076	Armenia	Armenia_C	39.73	Areni 1	45.2	aadr	LazaridisNature2016
I1634	6156	Armenia	Armenia_C	39.73	Areni 1	45.2	aadr	LazaridisNature2016
ARM003	5163	Armenia	Armenia_EBA_KuraAraxes_dupARM002	40.866667	South Caucasus mountains, Kaps	43.716667	aadr	WangNatureCommunications2019
I1630	750	Armenia	Armenia_EarlyMedieval	38.865	Agarak	46.199	aadr	LazaridisAlpaslanRoodenbergScience2022
I1659	655	Armenia	Armenia_EarlyMedieval	38.865	Agarak	46.199	aadr	LazaridisAlpaslanRoodenbergScience2022
I1660	750	Armenia	Armenia_EarlyMedieval	38.865	Agarak	46.199	aadr	LazaridisAlpaslanRoodenbergScience2022
I1633	4465	Armenia	Armenia_EBA	40.65	Kalavan	45.1167	aadr	LazaridisNature2016
I1635	4476	Armenia	Armenia_EBA	40.65	Kalavan	45.1167	aadr	LazaridisNature2016
I1658	5162	Armenia	Armenia_EBA	40.382958	Talin	43.873663	aadr	LazaridisNature2016
ARM001	5417	Armenia	Armenia_EBA_KuraAraxes	40.866667	South Caucasus mountains, Kaps	43.716667	aadr	WangNatureCommunications2019
ARM002	5163	Armenia	Armenia_EBA_KuraAraxes	40.866667	South Caucasus mountains, Kaps	43.716667	aadr	WangNatureCommunications2019
I13599	4337	Armenia	Armenia_EBA_KuraAraxes	40.783	Karnut Archaeological Complex	43.95	aadr	LazaridisAlpaslanRoodenbergScience2022
I14339	4409	Armenia	Armenia_EBA_KuraAraxes	41.03	Berkaber, Dzhoghaz Cemetery Meydanner	45.08	aadr	LazaridisAlpaslanRoodenbergScience2022
I14341	4400	Armenia	Armenia_EBA_KuraAraxes	41.03	Berkaber, Dzhoghaz Cemetery Meydanner	45.08	aadr	LazaridisAlpaslanRoodenbergScience2022
I15132	4479	Armenia	Armenia_EBA_KuraAraxes	41.03	Berkaber, Dzhoghaz Cemetery Meydanner	45.08	aadr	LazaridisAlpaslanRoodenbergScience2022
I16920	4400	Armenia	Armenia_EBA_KuraAraxes	41.03	Berkaber, Dzhoghaz Cemetery Meydanner	45.08	aadr	LazaridisAlpaslanRoodenbergScience2022
I14340	4340	Armenia	Armenia_EBA_KuraAraxes_fatherorsonI14343	41.03	Berkaber, Dzhoghaz Cemetery Meydanner	45.08	aadr	LazaridisAlpaslanRoodenbergScience2022
I1657	5123	Armenia	Armenia_EBA_motherordaughterI1658	40.39075	Talin cemetery	43.89106667	aadr	LazaridisAlpaslanRoodenbergScience2022
I14812	4700	Armenia	Armenia_EBA_o	40.783	Karnut Archaeological Complex	43.95	aadr	LazaridisAlpaslanRoodenbergScience2022
I16116	3050	Armenia	Armenia_EIA	40.91666	Bover Cemetery	44.5	aadr	LazaridisAlpaslanRoodenbergScience2022
I16117	2586	Armenia	Armenia_EIA	40.91666	Bover Cemetery	44.5	aadr	LazaridisAlpaslanRoodenbergScience2022
I16191	2608	Armenia	Armenia_EIA	40.91666	Pijut Archaeological Complex	44.5	aadr	LazaridisAlpaslanRoodenbergScience2022
I16193	2625	Armenia	Armenia_EIA	40.91666	Pijut Archaeological Complex	44.5	aadr	LazaridisAlpaslanRoodenbergScience2022
I17180	2566	Armenia	Armenia_EIA	40.91666	Pijut Archaeological Complex	44.5	aadr	LazaridisAlpaslanRoodenbergScience2022
I17181	2599	Armenia	Armenia_EIA	40.91666	Pijut Archaeological Complex	44.5	aadr	LazaridisAlpaslanRoodenbergScience2022
I16194	2625	Armenia	Armenia_EIA_o2	40.91666	Pijut Archaeological Complex	44.5	aadr	LazaridisAlpaslanRoodenbergScience2022
I16219	2590	Armenia	Armenia_EIA_o2_sonI17181	40.91666	Pijut Archaeological Complex	44.5	aadr	LazaridisAlpaslanRoodenbergScience2022
I19322	2600	Armenia	Armenia_EIA_oSouth	40.416667	Noratus	45.2	aadr	LazaridisAlpaslanRoodenbergScience2022
I14054	2723	Armenia	Armenia_IA	40.91666	Bardzryal Archaeological Complex	44.5	aadr	LazaridisAlpaslanRoodenbergScience2022
I14057	2599	Armenia	Armenia_IA	40.91666	Bardzryal Archaeological Complex	44.5	aadr	LazaridisAlpaslanRoodenbergScience2022
I16707	2823	Armenia	Armenia_IA	40.783	Karnut Archaeological Complex	43.95	aadr	LazaridisAlpaslanRoodenbergScience2022
I17184	2614	Armenia	Armenia_IA	40.8716	Keti	43.8445	aadr	LazaridisAlpaslanRoodenbergScience2022
I19327	2225	Armenia	Armenia_IA_oSouth	40.416667	Noratus	45.2	aadr	LazaridisAlpaslanRoodenbergScience2022
I1636	1956	Armenia	Armenia_LateHellenistic	39.549	Aghitu	45.078	aadr	LazaridisAlpaslanRoodenbergScience2022
I1639	1872	Armenia	Armenia_LateHellenistic	39.549	Aghitu	45.078	aadr	LazaridisAlpaslanRoodenbergScience2022
I1637	1956	Armenia	Armenia_LateHellenistic_fatherorsonI1636	39.549	Aghitu	45.078	aadr	LazaridisAlpaslanRoodenbergScience2022
I13948	3128	Armenia	Armenia_LBA	40.91666	Lori Berd cemetery	44.5	aadr	LazaridisAlpaslanRoodenbergScience2022
I15732	3318	Armenia	Armenia_LBA	40.91666	Nerkin Getashen	44.5	aadr	LazaridisAlpaslanRoodenbergScience2022
I15733	3320	Armenia	Armenia_LBA	40.91666	Nerkin Getashen	44.5	aadr	LazaridisAlpaslanRoodenbergScience2022
I15734	3325	Armenia	Armenia_LBA	40.91666	Nerkin Getashen	44.5	aadr	LazaridisAlpaslanRoodenbergScience2022
I15749	3150	Armenia	Armenia_LBA	40.91666	Nerkin Getashen	44.5	aadr	LazaridisAlpaslanRoodenbergScience2022
I16217	3074	Armenia	Armenia_LBA	40.416667	Karashamb Cemetery	45.2	aadr	LazaridisAlpaslanRoodenbergScience2022
I16220	3216	Armenia	Armenia_LBA	40.416667	Karashamb Cemetery	45.2	aadr	LazaridisAlpaslanRoodenbergScience2022
I16537	2977	Armenia	Armenia_LBA	40.91666	Pidjut, Znganek monument	44.5	aadr	LazaridisAlpaslanRoodenbergScience2022
I16554	3083	Armenia	Armenia_LBA	40.91666	Tekhut Cemetery	44.5	aadr	LazaridisAlpaslanRoodenbergScience2022
I17182	2941	Armenia	Armenia_LBA	40.8716	Keti	43.8445	aadr	LazaridisAlpaslanRoodenbergScience2022
I18479	3150	Armenia	Armenia_LBA	40.416667	Noratus	45.2	aadr	LazaridisAlpaslanRoodenbergScience2022
I19329	3217	Armenia	Armenia_LBA	40.416667	Noratus	45.2	aadr	LazaridisAlpaslanRoodenbergScience2022
I19331	3125	Armenia	Armenia_LBA	40.416667	Karashamb Cemetery	45.2	aadr	LazaridisAlpaslanRoodenbergScience2022
I19332	3125	Armenia	Armenia_LBA	40.416667	Karashamb Cemetery	45.2	aadr	LazaridisAlpaslanRoodenbergScience2022
I19333	3125	Armenia	Armenia_LBA	40.416667	Karashamb Cemetery	45.2	aadr	LazaridisAlpaslanRoodenbergScience2022
I19334	3125	Armenia	Armenia_LBA	40.416667	Karashamb Cemetery	45.2	aadr	LazaridisAlpaslanRoodenbergScience2022
I19335	3285	Armenia	Armenia_LBA	40.416667	Karashamb Cemetery	45.2	aadr	LazaridisAlpaslanRoodenbergScience2022
I19336	3285	Armenia	Armenia_LBA	40.416667	Karashamb Cemetery	45.2	aadr	LazaridisAlpaslanRoodenbergScience2022
I19338	3066	Armenia	Armenia_LBA	40.416667	Karashamb Cemetery	45.2	aadr	LazaridisAlpaslanRoodenbergScience2022
I19339	3125	Armenia	Armenia_LBA	40.416667	Karashamb Cemetery	45.2	aadr	LazaridisAlpaslanRoodenbergScience2022
I19341	3285	Armenia	Armenia_LBA	40.416667	Karashamb Cemetery	45.2	aadr	LazaridisAlpaslanRoodenbergScience2022
I19342	3125	Armenia	Armenia_LBA	40.416667	Karashamb Cemetery	45.2	aadr	LazaridisAlpaslanRoodenbergScience2022
I19343	3025	Armenia	Armenia_LBA	40.416667	Karashamb Cemetery	45.2	aadr	LazaridisAlpaslanRoodenbergScience2022
I19344	3285	Armenia	Armenia_LBA	40.416667	Karashamb Cemetery	45.2	aadr	LazaridisAlpaslanRoodenbergScience2022
I19345	3125	Armenia	Armenia_LBA	40.416667	Karashamb Cemetery	45.2	aadr	LazaridisAlpaslanRoodenbergScience2022
I19346	3125	Armenia	Armenia_LBA	40.416667	Karashamb Cemetery	45.2	aadr	LazaridisAlpaslanRoodenbergScience2022
I19347	3125	Armenia	Armenia_LBA	40.416667	Karashamb Cemetery	45.2	aadr	LazaridisAlpaslanRoodenbergScience2022
I19348	3285	Armenia	Armenia_LBA	40.416667	Karashamb Cemetery	45.2	aadr	LazaridisAlpaslanRoodenbergScience2022
I19349	3025	Armenia	Armenia_LBA	40.416667	Karashamb Cemetery	45.2	aadr	LazaridisAlpaslanRoodenbergScience2022
I19350	3125	Armenia	Armenia_LBA	40.416667	Karashamb Cemetery	45.2	aadr	LazaridisAlpaslanRoodenbergScience2022
I19351	3285	Armenia	Armenia_LBA	40.416667	Karashamb Cemetery	45.2	aadr	LazaridisAlpaslanRoodenbergScience2022
I19352	3285	Armenia	Armenia_LBA	40.416667	Karashamb Cemetery	45.2	aadr	LazaridisAlpaslanRoodenbergScience2022
I19353	2986	Armenia	Armenia_LBA	40.416667	Karashamb Cemetery	45.2	aadr	LazaridisAlpaslanRoodenbergScience2022
I19354	3052	Armenia	Armenia_LBA	40.416667	Karashamb Cemetery	45.2	aadr	LazaridisAlpaslanRoodenbergScience2022
I20439	2911	Armenia	Armenia_LBA	40.29221	Sarukhan	45.130679	aadr	LazaridisAlpaslanRoodenbergScience2022
I20440	3135	Armenia	Armenia_LBA	40.29221	Sarukhan	45.130679	aadr	LazaridisAlpaslanRoodenbergScience2022
I20441	2793	Armenia	Armenia_LBA	40.29221	Sarukhan	45.130679	aadr	LazaridisAlpaslanRoodenbergScience2022
I20443	2896	Armenia	Armenia_LBA	40.29221	Sarukhan	45.130679	aadr	LazaridisAlpaslanRoodenbergScience2022
I14051	2690	Armenia	Armenia_LBA_EIA	40.91666	Bardzryal Archaeological Complex	44.5	aadr	LazaridisAlpaslanRoodenbergScience2022
I14052	2690	Armenia	Armenia_LBA_EIA	40.91666	Bardzryal Archaeological Complex	44.5	aadr	LazaridisAlpaslanRoodenbergScience2022
I14053	2690	Armenia	Armenia_LBA_EIA	40.91666	Bardzryal Archaeological Complex	44.5	aadr	LazaridisAlpaslanRoodenbergScience2022
I14066	2875	Armenia	Armenia_LBA_EIA	40.91666	Bagheri Tchala Archaeological Complex	44.5	aadr	LazaridisAlpaslanRoodenbergScience2022
I14588	2875	Armenia	Armenia_LBA_EIA	40.91666	Bagheri Tchala Archaeological Complex	44.5	aadr	LazaridisAlpaslanRoodenbergScience2022
I14601	2875	Armenia	Armenia_LBA_EIA	40.91666	Bagheri Tchala Archaeological Complex	44.5	aadr	LazaridisAlpaslanRoodenbergScience2022
I14602	2875	Armenia	Armenia_LBA_EIA	40.91666	Bagheri Tchala Archaeological Complex	44.5	aadr	LazaridisAlpaslanRoodenbergScience2022
I14603	2877	Armenia	Armenia_LBA_EIA	40.91666	Bagheri Tchala Archaeological Complex	44.5	aadr	LazaridisAlpaslanRoodenbergScience2022
I14606	2875	Armenia	Armenia_LBA_EIA	40.91666	Bagheri Tchala Archaeological Complex	44.5	aadr	LazaridisAlpaslanRoodenbergScience2022
I14618	2986	Armenia	Armenia_LBA_EIA	40.91666	Bagheri Tchala Archaeological Complex	44.5	aadr	LazaridisAlpaslanRoodenbergScience2022
I14620	2915	Armenia	Armenia_LBA_EIA	40.91666	Bagheri Tchala Archaeological Complex	44.5	aadr	LazaridisAlpaslanRoodenbergScience2022
I15729	3150	Armenia	Armenia_LBA_EIA	40.91666	Nerkin Getashen	44.5	aadr	LazaridisAlpaslanRoodenbergScience2022
I15748	3285	Armenia	Armenia_LBA_EIA	40.91666	Nerkin Getashen	44.5	aadr	LazaridisAlpaslanRoodenbergScience2022
I15750	3285	Armenia	Armenia_LBA_EIA	40.91666	Nerkin Getashen	44.5	aadr	LazaridisAlpaslanRoodenbergScience2022
I16196	3125	Armenia	Armenia_LBA_EIA	40.91666	Lori Berd Cemetery	44.5	aadr	LazaridisAlpaslanRoodenbergScience2022
I18162	3125	Armenia	Armenia_LBA_EIA	40.833333	Black Fortress	43.916667	aadr	LazaridisAlpaslanRoodenbergScience2022
I18163	3125	Armenia	Armenia_LBA_EIA	40.833333	Black Fortress	43.916667	aadr	LazaridisAlpaslanRoodenbergScience2022
I18165	3125	Armenia	Armenia_LBA_EIA	40.833333	Black Fortress	43.916667	aadr	LazaridisAlpaslanRoodenbergScience2022
I18166	3285	Armenia	Armenia_LBA_EIA	40.516618	Lchashen cemetery	44.933321	aadr	LazaridisAlpaslanRoodenbergScience2022
I18167	3285	Armenia	Armenia_LBA_EIA	40.516618	Lchashen cemetery	44.933321	aadr	LazaridisAlpaslanRoodenbergScience2022
I18168	3285	Armenia	Armenia_LBA_EIA	40.516618	Lchashen cemetery	44.933321	aadr	LazaridisAlpaslanRoodenbergScience2022
I18248	3125	Armenia	Armenia_LBA_EIA	40.833333	Black Fortress	43.916667	aadr	LazaridisAlpaslanRoodenbergScience2022
I18467	3285	Armenia	Armenia_LBA_EIA	40.416667	Noratus	45.2	aadr	LazaridisAlpaslanRoodenbergScience2022
I18468	3050	Armenia	Armenia_LBA_EIA	40.416667	Noratus	45.2	aadr	LazaridisAlpaslanRoodenbergScience2022
I18469	2865	Armenia	Armenia_LBA_EIA	40.416667	Noratus	45.2	aadr	LazaridisAlpaslanRoodenbergScience2022
I18470	3050	Armenia	Armenia_LBA_EIA	40.416667	Noratus	45.2	aadr	LazaridisAlpaslanRoodenbergScience2022
I18472	3285	Armenia	Armenia_LBA_EIA	40.416667	Noratus	45.2	aadr	LazaridisAlpaslanRoodenbergScience2022
I18478	2750	Armenia	Armenia_LBA_EIA	40.416667	Noratus	45.2	aadr	LazaridisAlpaslanRoodenbergScience2022
I18481	3050	Armenia	Armenia_LBA_EIA	40.416667	Noratus	45.2	aadr	LazaridisAlpaslanRoodenbergScience2022
I18486	3285	Armenia	Armenia_LBA_EIA	40.416667	Noratus	45.2	aadr	LazaridisAlpaslanRoodenbergScience2022
I18487	3390	Armenia	Armenia_LBA_EIA	40.416667	Noratus	45.2	aadr	LazaridisAlpaslanRoodenbergScience2022
I19321	3050	Armenia	Armenia_LBA_EIA	40.416667	Noratus	45.2	aadr	LazaridisAlpaslanRoodenbergScience2022
I19323	3390	Armenia	Armenia_LBA_EIA	40.416667	Noratus	45.2	aadr	LazaridisAlpaslanRoodenbergScience2022
I19324	2865	Armenia	Armenia_LBA_EIA	40.416667	Noratus	45.2	aadr	LazaridisAlpaslanRoodenbergScience2022
I19325	3285	Armenia	Armenia_LBA_EIA	40.416667	Noratus	45.2	aadr	LazaridisAlpaslanRoodenbergScience2022
I19326	3150	Armenia	Armenia_LBA_EIA	40.416667	Noratus	45.2	aadr	LazaridisAlpaslanRoodenbergScience2022
I19328	2809	Armenia	Armenia_LBA_EIA	40.416667	Noratus	45.2	aadr	LazaridisAlpaslanRoodenbergScience2022
I14065	2875	Armenia	Armenia_LBA_EIA_brotherI14619I23941	40.91666	Bagheri Tchala Archaeological Complex	44.5	aadr	LazaridisAlpaslanRoodenbergScience2022
I16376	2690	Armenia	Armenia_LBA_EIA_brotherI22904	40.91666	Bover Cemetery	44.5	aadr	LazaridisAlpaslanRoodenbergScience2022
I14619	2875	Armenia	Armenia_LBA_EIA_brotherI23941I14065	40.91666	Bagheri Tchala Archaeological Complex	44.5	aadr	LazaridisAlpaslanRoodenbergScience2022
I14621	2875	Armenia	Armenia_LBA_EIA_motherI14618	40.91666	Bagheri Tchala Archaeological Complex	44.5	aadr	LazaridisAlpaslanRoodenbergScience2022
I18483	3150	Armenia	Armenia_LBA_EIA_motherI18276	40.416667	Noratus	45.2	aadr	LazaridisAlpaslanRoodenbergScience2022
I18164	3125	Armenia	Armenia_LBA_EIA_o	40.833333	Black Fortress	43.916667	aadr	LazaridisAlpaslanRoodenbergScience2022
I18247	3125	Armenia	Armenia_LBA_EIA_o	40.833333	Black Fortress	43.916667	aadr	LazaridisAlpaslanRoodenbergScience2022
I14617	2915	Armenia	Armenia_LBA_EIA_sonI14603sonI14619	40.91666	Bagheri Tchala Archaeological Complex	44.5	aadr	LazaridisAlpaslanRoodenbergScience2022
DA35_noUDG.SG	3259	Armenia	Armenia_LBA_LchashenMetsamorSG	40.52027778	Caucasus	44.93083333	aadr	DamgaardNature2018
I18267	3285	Armenia	Armenia_Lchashen_LBA	40.516618	Lchashen cemetery	44.933321	aadr	LazaridisAlpaslanRoodenbergScience2022
I18269	3285	Armenia	Armenia_Lchashen_LBA	40.516618	Lchashen cemetery	44.933321	aadr	LazaridisAlpaslanRoodenbergScience2022
I18270	3285	Armenia	Armenia_Lchashen_LBA	40.516618	Lchashen cemetery	44.933321	aadr	LazaridisAlpaslanRoodenbergScience2022
I18271	3285	Armenia	Armenia_Lchashen_LBA	40.516618	Lchashen cemetery	44.933321	aadr	LazaridisAlpaslanRoodenbergScience2022
I18272	3285	Armenia	Armenia_Lchashen_LBA	40.516618	Lchashen cemetery	44.933321	aadr	LazaridisAlpaslanRoodenbergScience2022
I18274	3150	Armenia	Armenia_Lchashen_LBA	40.516618	Lchashen cemetery	44.933321	aadr	LazaridisAlpaslanRoodenbergScience2022
I18275	3285	Armenia	Armenia_Lchashen_LBA	40.516618	Lchashen cemetery	44.933321	aadr	LazaridisAlpaslanRoodenbergScience2022
I18276	3285	Armenia	Armenia_Lchashen_LBA	40.516618	Lchashen cemetery	44.933321	aadr	LazaridisAlpaslanRoodenbergScience2022
I18277	3285	Armenia	Armenia_Lchashen_LBA	40.516618	Lchashen cemetery	44.933321	aadr	LazaridisAlpaslanRoodenbergScience2022
I18278	3285	Armenia	Armenia_Lchashen_LBA	40.516618	Lchashen cemetery	44.933321	aadr	LazaridisAlpaslanRoodenbergScience2022
I18279	3285	Armenia	Armenia_Lchashen_LBA	40.516618	Lchashen cemetery	44.933321	aadr	LazaridisAlpaslanRoodenbergScience2022
I18280	3285	Armenia	Armenia_Lchashen_LBA	40.516618	Lchashen cemetery	44.933321	aadr	LazaridisAlpaslanRoodenbergScience2022
I18273	3285	Armenia	Armenia_Lchashen_LBA_o	40.516618	Lchashen cemetery	44.933321	aadr	LazaridisAlpaslanRoodenbergScience2022
I18159	2565	Armenia	Armenia_LIA	39.434403	Harjis cemetery	46.22504	aadr	LazaridisAlpaslanRoodenbergScience2022
I18160	2565	Armenia	Armenia_LIA	39.434403	Harjis cemetery	46.22504	aadr	LazaridisAlpaslanRoodenbergScience2022
I18161	2565	Armenia	Armenia_LIA	39.434403	Harjis cemetery	46.22504	aadr	LazaridisAlpaslanRoodenbergScience2022
I18236	2565	Armenia	Armenia_LIA	39.434403	Harjis cemetery	46.22504	aadr	LazaridisAlpaslanRoodenbergScience2022
I18237	2565	Armenia	Armenia_LIA	39.434403	Harjis cemetery	46.22504	aadr	LazaridisAlpaslanRoodenbergScience2022
I18238	2565	Armenia	Armenia_LIA	39.434403	Harjis cemetery	46.22504	aadr	LazaridisAlpaslanRoodenbergScience2022
I20436	3024	Armenia	Armenia_LBA	40.29221	Sarukhan	45.130679	aadr	LazaridisAlpaslanRoodenbergScience2022
I20444	2622	Armenia	Armenia_EIA	40.29221	Sarukhan	45.130679	aadr	LazaridisAlpaslanRoodenbergScience2022
I20438	2023	Armenia	Armenia_LIA_o2	40.29221	Sarukhan	45.130679	aadr	LazaridisAlpaslanRoodenbergScience2022
I20437	2022	Armenia	Armenia_LIA_o3	40.29221	Sarukhan	45.130679	aadr	LazaridisAlpaslanRoodenbergScience2022
I14813	3945	Armenia	Armenia_MBA	40.783	Tavshut	43.95	aadr	LazaridisAlpaslanRoodenbergScience2022
I1656	3397	Armenia	Armenia_MBA	40.377222	Katnaghbiur 1	43.938333	aadr	LazaridisNature2016
I17183	3270	Armenia	Armenia_MBA	40.8716	Keti	43.8445	aadr	LazaridisAlpaslanRoodenbergScience2022
I19340	3285	Armenia	Armenia_MBA	40.416667	Karashamb Cemetery	45.2	aadr	LazaridisAlpaslanRoodenbergScience2022
I16120	3390	Armenia	Armenia_MBA_o	40.91666	Dzori Gekh Archaeological complex	44.5	aadr	LazaridisAlpaslanRoodenbergScience2022
RISE423_noUDG.SG	3251	Armenia	Armenia_MBASG	40.14	Nerquin Getashen	45.26	aadr	AllentoftNature2015
I10252	1850	Armenia	Armenia_Antiquity	40.833333	Vardbakh, Yerevan 2 Cave	43.916667	aadr	LazaridisAlpaslanRoodenbergScience2022
I11855	2806	Armenia	Armenia_UrartianEmpire	40.15118	Karmir Blur, necropolis of Teishebaini	44.44316667	aadr	LazaridisAlpaslanRoodenbergScience2022
I16118	2595	Armenia	Armenia_UrartianEmpire	40.15118	Karmir Blur, necropolis of Teishebaini	44.44316667	aadr	LazaridisAlpaslanRoodenbergScience2022
S_Armenian-1.DG	0	Armenia	ArmenianDG	39.815278	Yerevan	46.751944	aadr	MallickNature2016
S_Armenian-2.DG	0	Armenia	ArmenianDG	40.604517	Kars (ancestors from Kars, born in Akhuzyan)	43.100758	aadr	MallickNature2016
I5069	6961	Austria	Austria_EN_LBK	48.663197	Kleinhadersdorf Flur Marchleiten	16.589687	aadr	MathiesonNature2018
I11699	2300	Austria	Austria_IA_LaTene	48.241109	Lower Austria, St. Pölten, Pottenbrunn	15.701654	aadr	PattersonNature2021
I11701	2300	Austria	Austria_IA_LaTene	48.241109	Lower Austria, St. Pölten, Pottenbrunn	15.701654	aadr	PattersonNature2021
I11708	2300	Austria	Austria_IA_LaTene	48.241109	Lower Austria, St. Pölten, Pottenbrunn	15.701654	aadr	PattersonNature2021
I5208	7150	Austria	Austria_N_LBK	48.579752	Asparn Schletz	16.46931	aadr	MathiesonNature2018
I5205	7150	Austria	Austria_N_LBK	48.579752	Asparn Schletz	16.46931	aadr	MathiesonNature2018
I5206	7150	Austria	Austria_N_LBK	48.579752	Asparn Schletz	16.46931	aadr	MathiesonNature2018
I5207	7150	Austria	Austria_N_LBK	48.579752	Asparn Schletz	16.46931	aadr	MathiesonNature2018
ALX002	5660	Azerbaijan	Azerbaijan_Caucasus_lowlands_LateC	39.3607139	Jalilabad district, Uchtepe village, Alkhantepe	48.4613556	aadr	SkourtaniotiCell2020
MTT001	7638	Azerbaijan	Azerbaijan_Caucasus_lowlands_LN	40.9418889	Zeyem Chaj , Mentesh Tepe	45.8327778	aadr	SkourtaniotiCell2020
POT002	7378	Azerbaijan	Azerbaijan_Caucasus_lowlands_LN	39.5186111	Jalilabad district, Uchtepe village, Polutepe	48.65	aadr	SkourtaniotiCell2020
S_Basque-1.DG	0	France	BasqueDG	43	..	0	aadr	MallickNature2016 (shotgun data with SNP array data first published in LiScience2008 and JakobssonNature2008)
S_Basque-2.DG	0	France	BasqueDG	43	..	0	aadr	MallickNature2016 (shotgun data with SNP array data first published in LiScience2008 and JakobssonNature2008)
HGDP01357.DG	0	France	BasqueDG	43	..	0	aadr	BergstromScience2020
HGDP01358.DG	0	France	BasqueDG	43	..	0	aadr	BergstromScience2020
HGDP01359.DG	0	France	BasqueDG	43	..	0	aadr	BergstromScience2020
HGDP01360.DG	0	France	BasqueDG	43	..	0	aadr	BergstromScience2020
HGDP01361.DG	0	France	BasqueDG	43	..	0	aadr	BergstromScience2020
HGDP01362.DG	0	France	BasqueDG	43	..	0	aadr	BergstromScience2020
HGDP01363.DG	0	France	BasqueDG	43	..	0	aadr	BergstromScience2020
HGDP01364.DG	0	France	BasqueDG	43	..	0	aadr	BergstromScience2020
HGDP01365.DG	0	France	BasqueDG	43	..	0	aadr	BergstromScience2020
HGDP01366.DG	0	France	BasqueDG	43	..	0	aadr	BergstromScience2020
HGDP01367.DG	0	France	BasqueDG	43	..	0	aadr	BergstromScience2020
HGDP01368.DG	0	France	BasqueDG	43	..	0	aadr	BergstromScience2020
HGDP01370.DG	0	France	BasqueDG	43	..	0	aadr	BergstromScience2020
HGDP01373.DG	0	France	BasqueDG	43	..	0	aadr	BergstromScience2020
HGDP01374.DG	0	France	BasqueDG	43	..	0	aadr	BergstromScience2020
HGDP01375.DG	0	France	BasqueDG	43	..	0	aadr	BergstromScience2020
HGDP01376.DG	0	France	BasqueDG	43	..	0	aadr	BergstromScience2020
HGDP01377.DG	0	France	BasqueDG	43	..	0	aadr	BergstromScience2020
HGDP01378.DG	0	France	BasqueDG	43	..	0	aadr	BergstromScience2020
HGDP01379.DG	0	France	BasqueDG	43	..	0	aadr	BergstromScience2020
HGDP01380.DG	0	France	BasqueDG	43	..	0	aadr	BergstromScience2020
GoyetQ-2_noUDG	15077	Belgium	Belgium_UP_Magdalenian	50.446	Troisieme caverne of Goyet cave	5.008	aadr	FuNature2016 + VillalbaMoucoCurrentBiology2019 merge
S_Bergamo-2.DG	0	Italy	BergamoDG	46	..	10	aadr	MallickNature2016 (shotgun data with SNP array data first published in LiScience2008 and JakobssonNature2008)
Bul6	4450	Bulgaria	Bulgaria_BeliBreyag_EBA	42.429624	Nova Zagora, Beli Breyag	25.898354	aadr	MathiesonNature2018
I0781	6404	Bulgaria	Bulgaria_C	42.232227	Yunatsite	24.262688	aadr	MathiesonNature2018
I2423	6381	Bulgaria	Bulgaria_C	43.05777778	Smyadovo	26.98361111	aadr	MathiesonNature2018
I2424	6288	Bulgaria	Bulgaria_C	43.05777778	Smyadovo	26.98361111	aadr	MathiesonNature2018
I2427	6326	Bulgaria	Bulgaria_C	43.05888889	Sushina	26.76722222	aadr	MathiesonNature2018
I2430	6448	Bulgaria	Bulgaria_C	43.05777778	Smyadovo	26.98361111	aadr	MathiesonNature2018
I2431	6624	Bulgaria	Bulgaria_C	43.09916667	Ivanovo	26.71944444	aadr	MathiesonNature2018
I2509	6350	Bulgaria	Bulgaria_C	43.16089	Veliko Tarnovo, Dzhulyunitsa	25.88341	aadr	MathiesonNature2018
I2519	6237	Bulgaria	Bulgaria_C	43.16089	Veliko Tarnovo, Dzhulyunitsa	25.88341	aadr	MathiesonNature2018
I2526	7293	Bulgaria	Bulgaria_C	43.139507	Samovodene	25.610236	aadr	MathiesonNature2018
I19451	4450	Bulgaria	Bulgaria_EBA	42.666642	Kazanlak, Tell Kran (Central, Yasenovo)	25.373858	aadr	LazaridisAlpaslanRoodenbergScience2022
I19452	4450	Bulgaria	Bulgaria_EBA	42.666642	Kazanlak, Tell Kran (Central, Yasenovo)	25.373858	aadr	LazaridisAlpaslanRoodenbergScience2022
I19454	4450	Bulgaria	Bulgaria_EBA	42.666642	Kazanlak, Tell Kran (Central, Yasenovo)	25.373858	aadr	LazaridisAlpaslanRoodenbergScience2022
I2175	5097	Bulgaria	Bulgaria_EBA	43.05777778	Smyadovo	26.98361111	aadr	MathiesonNature2018
I2180	4959	Bulgaria	Bulgaria_EBA	43.066667	Smyadovo (Northeast)	27.016667	aadr	LazaridisAlpaslanRoodenbergScience2022
I2520	5153	Bulgaria	Bulgaria_EBA	43.16089	Veliko Tarnovo, Dzhulyunitsa	25.88341	aadr	MathiesonNature2018
I2176_enhanced	5146	Bulgaria	Bulgaria_EBA_contam	43.05777778	Smyadovo (Northeast)	26.98361111	aadr	LazaridisAlpaslanRoodenbergScience2022 (higher coverage of previously reported individual from MathiesonNature2018)
I20182	4100	Bulgaria	Bulgaria_EBA_MBA	41.73	Kapitan Andreevo (South)	26.33	aadr	LazaridisAlpaslanRoodenbergScience2022
I2510	4794	Bulgaria	Bulgaria_EBA_o1	43.16089	Veliko Tarnovo, Dzhulyunitsa	25.88341	aadr	MathiesonNature2018
I2165	4910	Bulgaria	Bulgaria_EBA_o2	42.132897	Merichleri, Kairyaka necropolis	25.496288	aadr	MathiesonNature2018
I2176	5146	Bulgaria	Bulgaria_EBA_contam	43.05777778	Smyadovo (Northeast)	26.98361111	aadr	MathiesonNature2018
I18793	4096	Bulgaria	Bulgaria_EBA_Yamnaya	42.281	Boyanovo	26.63425	aadr	LazaridisAlpaslanRoodenbergScience2022
I18794	4200	Bulgaria	Bulgaria_EBA_Yamnaya	42.281	Boyanovo	26.63425	aadr	LazaridisAlpaslanRoodenbergScience2022
Bul4	4895	Bulgaria	Bulgaria_EBA_Yamnaya_o	42.4296241	Nova Zagora, Mednikarovo	25.8983541	aadr	MathiesonNature2018
I20180	2750	Bulgaria	Bulgaria_EIA	41.73	Kapitan Andreevo (South)	26.33	aadr	LazaridisAlpaslanRoodenbergScience2022
I20181	2750	Bulgaria	Bulgaria_EIA	41.73	Kapitan Andreevo (South)	26.33	aadr	LazaridisAlpaslanRoodenbergScience2022
I20183	2750	Bulgaria	Bulgaria_EIA	41.73	Kapitan Andreevo (South)	26.33	aadr	LazaridisAlpaslanRoodenbergScience2022
I20184	2750	Bulgaria	Bulgaria_EIA	41.73	Kapitan Andreevo (South)	26.33	aadr	LazaridisAlpaslanRoodenbergScience2022
I20185	2750	Bulgaria	Bulgaria_EIA	41.73	Kapitan Andreevo (South)	26.33	aadr	LazaridisAlpaslanRoodenbergScience2022
I20186	2750	Bulgaria	Bulgaria_EIA	41.73	Kapitan Andreevo (South)	26.33	aadr	LazaridisAlpaslanRoodenbergScience2022
I5769	2592	Bulgaria	Bulgaria_IA	43.16089	Veliko Tarnovo, Dzhulyunitsa	25.88341	aadr	MathiesonNature2018
I0679_d	7617	Bulgaria	Bulgaria_Krepost_N	42.02	Krepost	25.6	aadr	MathiesonNature2018
I19500	2200	Bulgaria	Bulgaria_LIA	42.56	Rozovo (Central, Stara Zagora, Kazanlak)	25.41	aadr	LazaridisAlpaslanRoodenbergScience2022
I0700	7550	Bulgaria	Bulgaria_MalakPreslavets_N_oLowEEF_1drelI1108	43.98	Malak Preslavets	26.4	aadr	MathiesonNature2018
I10548	825	Bulgaria	Bulgaria_Medieval	43.12	Ryahovets ( Gorna Oryahovitsa, Veliko Tarnovo)	25.68	aadr	LazaridisAlpaslanRoodenbergScience2022
I17980	797	Bulgaria	Bulgaria_Medieval	43.12	Ryahovets (Gorna Oryahovitsa, Veliko Tarnovo)	25.68	aadr	LazaridisAlpaslanRoodenbergScience2022
I2525	1014	Bulgaria	Bulgaria_Medieval_oEastAsia	43.139507	Samovodene (Veliko Tarnovo)	25.610236	aadr	LazaridisAlpaslanRoodenbergScience2022
I2163	3639	Bulgaria	Bulgaria_MLBA	42.132897	Merichleri, Kairyaka necropolis	25.496288	aadr	MathiesonNature2018
I11134	7725	Bulgaria	Bulgaria_N	43.16089	Dzhulyunitsa (Veliko Tarnovo)	25.88341	aadr	LazaridisAlpaslanRoodenbergScience2022
I11135	7725	Bulgaria	Bulgaria_N	43.16089	Dzhulyunitsa (Veliko Tarnovo)	25.88341	aadr	LazaridisAlpaslanRoodenbergScience2022
I2521	7503	Bulgaria	Bulgaria_N	43.16089	Veliko Tarnovo, Dzhulyunitsa	25.88341	aadr	MathiesonNature2018
I2529_enhanced	7610	Bulgaria	Bulgaria_N	42.1	Yabalkovo, Dimitrovgrad, Haskovo	25.75	aadr	LazaridisAlpaslanRoodenbergScience2022 (higher coverage of previously reported individual from MathiesonNature2018)
I17981	7725	Bulgaria	Bulgaria_N_o	43.16089	Dzhulyunitsa (Veliko Tarnovo)	25.88341	aadr	LazaridisAlpaslanRoodenbergScience2022
I0698	7900	Bulgaria	Bulgaria_N	42.1	Yabalkovo (Dimitrovgrad, Haskovo)	25.75	aadr	MathiesonNature2018
I2529	7610	Bulgaria	Bulgaria_N	42.1	Yabalkovo, Dimitrovgrad, Haskovo	25.75	aadr	MathiesonNature2018
ANI159-ANI181	6566	Bulgaria	Bulgaria_Varna_C	43.2131	Varna	27.8644	aadr	MathiesonNature2018
ANI163	6569	Bulgaria	Bulgaria_Varna_C_contam	43.2131	Varna	27.8644	aadr	MathiesonNature2018
S_Bulgarian-1.DG	0	Bulgaria	BulgarianDG	42.163403	Plovdiv	24.741211	aadr	MallickNature2016
S_Bulgarian-2.DG	0	Bulgaria	BulgarianDG	42.163403	Plovdiv	24.741211	aadr	MallickNature2016
B_Crete-1.DG	0	Greece	CretanDG	35.166668	Preveliana, Irakleioy	25.166666	aadr	MallickNature2016
B_Crete-2.DG	0	Greece	CretanDG	35.163	Psychro, Lassithi	25.445	aadr	MallickNature2016
I18712	3600	Croatia	Croatia_BA	43.45783	D. Ostrvica-Pasičine	16.74911	aadr	LazaridisAlpaslanRoodenbergScience2022
I18748	3700	Croatia	Croatia_BA	43.130852	Bogomolje, 1981	16.997339	aadr	LazaridisAlpaslanRoodenbergScience2022
I20502	5950	Croatia	Croatia_C	45.312965	Dakovo - Franjevac, 2007	18.402813	aadr	LazaridisAlpaslanRoodenbergScience2022
I10045	6050	Croatia	Croatia_C_Lasinja	45.4482	Potočani	17.6388	aadr	NovakPLoSOne2021
I10046	6050	Croatia	Croatia_C_Lasinja	45.4482	Potočani	17.6388	aadr	NovakPLoSOne2021
I10047	6050	Croatia	Croatia_C_Lasinja	45.4482	Potočani	17.6388	aadr	NovakPLoSOne2021
I10048	6050	Croatia	Croatia_C_Lasinja	45.4482	Potočani	17.6388	aadr	NovakPLoSOne2021
I10049	6050	Croatia	Croatia_C_Lasinja	45.4482	Potočani	17.6388	aadr	NovakPLoSOne2021
I10050	6050	Croatia	Croatia_C_Lasinja	45.4482	Potočani	17.6388	aadr	NovakPLoSOne2021
I10053	6050	Croatia	Croatia_C_Lasinja	45.4482	Potočani	17.6388	aadr	NovakPLoSOne2021
I10054	6050	Croatia	Croatia_C_Lasinja	45.4482	Potočani	17.6388	aadr	NovakPLoSOne2021
I10056	6050	Croatia	Croatia_C_Lasinja	45.4482	Potočani	17.6388	aadr	NovakPLoSOne2021
I10057	6050	Croatia	Croatia_C_Lasinja	45.4482	Potočani	17.6388	aadr	NovakPLoSOne2021
I10062	6050	Croatia	Croatia_C_Lasinja	45.4482	Potočani	17.6388	aadr	NovakPLoSOne2021
I10063	6050	Croatia	Croatia_C_Lasinja	45.4482	Potočani	17.6388	aadr	NovakPLoSOne2021
I10064	6050	Croatia	Croatia_C_Lasinja	45.4482	Potočani	17.6388	aadr	NovakPLoSOne2021
I10065	6050	Croatia	Croatia_C_Lasinja	45.4482	Potočani	17.6388	aadr	NovakPLoSOne2021
I10069	6050	Croatia	Croatia_C_Lasinja	45.4482	Potočani	17.6388	aadr	NovakPLoSOne2021
I10070	6050	Croatia	Croatia_C_Lasinja	45.4482	Potočani	17.6388	aadr	NovakPLoSOne2021
I10071	6050	Croatia	Croatia_C_Lasinja	45.4482	Potočani	17.6388	aadr	NovakPLoSOne2021
I10072	6050	Croatia	Croatia_C_Lasinja	45.4482	Potočani	17.6388	aadr	NovakPLoSOne2021
I10271	6050	Croatia	Croatia_C_Lasinja	45.4482	Potočani	17.6388	aadr	NovakPLoSOne2021
I10273	6050	Croatia	Croatia_C_Lasinja	45.4482	Potočani	17.6388	aadr	NovakPLoSOne2021
I10293	6093	Croatia	Croatia_C_Lasinja	45.4482	Potočani	17.6388	aadr	NovakPLoSOne2021
I10294	6050	Croatia	Croatia_C_Lasinja	45.4482	Potočani	17.6388	aadr	NovakPLoSOne2021
I10297	6050	Croatia	Croatia_C_Lasinja	45.4482	Potočani	17.6388	aadr	NovakPLoSOne2021
I10299	6050	Croatia	Croatia_C_Lasinja	45.4482	Potočani	17.6388	aadr	NovakPLoSOne2021
I10303	6050	Croatia	Croatia_C_Lasinja	45.4482	Potočani	17.6388	aadr	NovakPLoSOne2021
I10068	6050	Croatia	Croatia_C_Lasinja_fatherI10070I10074	45.4482	Potočani	17.6388	aadr	NovakPLoSOne2021
I10061	6050	Croatia	Croatia_C_Lasinja_fatherI10294	45.4482	Potočani	17.6388	aadr	NovakPLoSOne2021
I23904	2642	Croatia	Croatia_EIA	44.555384	Smiljan	15.310516	aadr	PattersonNature2021
I23911	2765	Croatia	Croatia_EIA	44.555384	Smiljan	15.310516	aadr	PattersonNature2021
I23995	2729	Croatia	Croatia_EIA	44.555384	Smiljan	15.310516	aadr	PattersonNature2021
I23996	2744	Croatia	Croatia_EIA	44.555384	Smiljan	15.310516	aadr	PattersonNature2021
I24638	2658	Croatia	Croatia_EIA	44.555384	Smiljan	15.310516	aadr	PattersonNature2021
I24639	2658	Croatia	Croatia_EIA	44.555384	Smiljan	15.310516	aadr	PattersonNature2021
I24879	2599	Croatia	Croatia_EIA	45.21455	Skradnik-Sultanov grob	15.315809	aadr	PattersonNature2021
I24882	2599	Croatia	Croatia_EIA	45.173585	Mala Metaljka	16.124298	aadr	PattersonNature2021
I5723	2374	Croatia	Croatia_EIA	45.900833	Sv. Križ Brdovečki	15.700288	aadr	LazaridisAlpaslanRoodenbergScience2022
I5724	2232	Croatia	Croatia_EIA	45.900833	Sv. Križ Brdovečki	15.700288	aadr	LazaridisAlpaslanRoodenbergScience2022
I5725	2554	Croatia	Croatia_EIA	45.900833	Sv. Križ Brdovečki	15.700288	aadr	LazaridisAlpaslanRoodenbergScience2022
I5726	2407	Croatia	Croatia_EIA	45.900833	Sv. Križ Brdovečki	15.700288	aadr	LazaridisAlpaslanRoodenbergScience2022
I5727	2586	Croatia	Croatia_EIA	45.900833	Sv. Križ Brdovečki	15.700288	aadr	LazaridisAlpaslanRoodenbergScience2022
I5728	2224	Croatia	Croatia_EIA	45.900833	Sv. Križ Brdovečki	15.700288	aadr	LazaridisAlpaslanRoodenbergScience2022
I5729	2920	Croatia	Croatia_EIA	46.255979	Sv Petar Ludbreski	16.692342	aadr	LazaridisAlpaslanRoodenbergScience2022
I3313	2722	Croatia	Croatia_EIA_motherI26742	43.894	Jazinka Cave	15.977	aadr	MathiesonNature2018
I5071	7582	Croatia	Croatia_EN_Impressa	43.35141	Kargadur	16.461788	aadr	MathiesonNature2018
I5072	7545	Croatia	Croatia_EN_Impressa	43.35141	Kargadur	16.461788	aadr	MathiesonNature2018
I3499	4718	Croatia	Croatia_LateC_EBA_Vucedol	45.338767	Beli Manastir-Popova zemlja	18.698861	aadr	MathiesonNature2018
I26742	2650	Croatia	Croatia_LBA_EIA	43.705878	Jazinka Cave	16.520021	aadr	PattersonNature2021
I18831	2201	Croatia	Croatia_LIA	43.88741	Velim-Kosa	15.72534	aadr	LazaridisAlpaslanRoodenbergScience2022
I18830	2201	Croatia	Croatia_LIA_brotherI18831	43.88741	Velim-Kosa	15.72534	aadr	LazaridisAlpaslanRoodenbergScience2022
I24342	3410	Croatia	Croatia_MBA	43.88741	Velim-Kosa	15.72534	aadr	PattersonNature2021
I26773	3325	Croatia	Croatia_MBA	45.068212	Mušego/Mon Sego	13.70839	aadr	PattersonNature2021
I26774	3325	Croatia	Croatia_MBA	45.068212	Mušego/Mon Sego	13.70839	aadr	PattersonNature2021
I26893	3325	Croatia	Croatia_MBA	45.068212	Mušego/Mon Sego	13.70839	aadr	PattersonNature2021
I4331	3519	Croatia	Croatia_MBA	43.194	Veliki Vanik	17.344	aadr	MathiesonNature2018
I4332	3508	Croatia	Croatia_MBA	43.194	Veliki Vanik	17.344	aadr	MathiesonNature2018
I5073	3573	Croatia	Croatia_MBA	43.607274	Koprivno	16.54708	aadr	LazaridisAlpaslanRoodenbergScience2022
I5074	3385	Croatia	Croatia_MBA	43.17	Matkovici	17.26	aadr	LazaridisAlpaslanRoodenbergScience2022
I5080	3631	Croatia	Croatia_MBA	44.92	Zavojane-Ravca, Velika Gomila	16.05	aadr	LazaridisAlpaslanRoodenbergScience2022
I11843	3750	Croatia	Croatia_MBA_Cetina	43.9672237	Cetina Valley	16.4326708	aadr	LazaridisAlpaslanRoodenbergScience2022
I18745	3750	Croatia	Croatia_MBA_Cetina	43.9672237	Cetina Valley	16.4326708	aadr	LazaridisAlpaslanRoodenbergScience2022
I18746	3750	Croatia	Croatia_MBA_Cetina	43.9672237	Cetina Valley	16.4326708	aadr	LazaridisAlpaslanRoodenbergScience2022
I18747	3750	Croatia	Croatia_MBA_Cetina	43.9672237	Cetina Valley	16.4326708	aadr	LazaridisAlpaslanRoodenbergScience2022
I18752	3750	Croatia	Croatia_MBA_Cetina	43.9672237	Cetina Valley	16.4326708	aadr	LazaridisAlpaslanRoodenbergScience2022
I19027	3750	Croatia	Croatia_MBA_Cetina	43.9672237	Cetina Valley	16.4326708	aadr	LazaridisAlpaslanRoodenbergScience2022
I15462	1216	Croatia	Croatia_Medieval	43.530795	Trogir	16.260044	aadr	LazaridisAlpaslanRoodenbergScience2022
I15741	1096	Croatia	Croatia_Medieval	43.530795	Trogir	16.260044	aadr	LazaridisAlpaslanRoodenbergScience2022
I15743	1029	Croatia	Croatia_Medieval	43.530795	Trogir	16.260044	aadr	LazaridisAlpaslanRoodenbergScience2022
I15744	1228	Croatia	Croatia_Medieval	43.530795	Trogir	16.260044	aadr	LazaridisAlpaslanRoodenbergScience2022
I15742	1232	Croatia	Croatia_Medieval_o	43.530795	Trogir	16.260044	aadr	LazaridisAlpaslanRoodenbergScience2022
I15463	1200	Croatia	Croatia_Medieval_sisterI15744	43.530795	Trogir	16.260044	aadr	LazaridisAlpaslanRoodenbergScience2022
I1875	9056	Croatia	Croatia_Mesolithic_HG	42.96723	Vela Spila	16.70719	aadr	MathiesonNature2018
I18072	3450	Croatia	Croatia_MLBA	44.8520052	Bezdanjača Cave	15.4199444	aadr	LazaridisAlpaslanRoodenbergScience2022
I18077	3450	Croatia	Croatia_MLBA	44.8520052	Bezdanjača Cave	15.4199444	aadr	LazaridisAlpaslanRoodenbergScience2022
I18078	3450	Croatia	Croatia_MLBA	44.8520052	Bezdanjača Cave	15.4199444	aadr	LazaridisAlpaslanRoodenbergScience2022
I18082	3450	Croatia	Croatia_MLBA	44.8520052	Bezdanjača Cave	15.4199444	aadr	LazaridisAlpaslanRoodenbergScience2022
I18413	3100	Croatia	Croatia_MLBA	44.8520052	Bezdanjača Cave	15.4199444	aadr	LazaridisAlpaslanRoodenbergScience2022
I18415	3100	Croatia	Croatia_MLBA	44.8520052	Bezdanjača Cave	15.4199444	aadr	LazaridisAlpaslanRoodenbergScience2022
I18416	3100	Croatia	Croatia_MLBA	44.8520052	Bezdanjača Cave	15.4199444	aadr	LazaridisAlpaslanRoodenbergScience2022
I18417	3100	Croatia	Croatia_MLBA	44.8520052	Bezdanjača Cave	15.4199444	aadr	LazaridisAlpaslanRoodenbergScience2022
I18720	3100	Croatia	Croatia_MLBA	44.8520052	Bezdanjača Cave	15.4199444	aadr	LazaridisAlpaslanRoodenbergScience2022
I18721	3100	Croatia	Croatia_MLBA	44.8520052	Bezdanjača Cave	15.4199444	aadr	LazaridisAlpaslanRoodenbergScience2022
I18723	3100	Croatia	Croatia_MLBA	44.8520052	Bezdanjača Cave	15.4199444	aadr	LazaridisAlpaslanRoodenbergScience2022
I18724	3100	Croatia	Croatia_MLBA	44.8520052	Bezdanjača Cave	15.4199444	aadr	LazaridisAlpaslanRoodenbergScience2022
I18725	3100	Croatia	Croatia_MLBA	44.8520052	Bezdanjača Cave	15.4199444	aadr	LazaridisAlpaslanRoodenbergScience2022
I18727	3100	Croatia	Croatia_MLBA	44.8520052	Bezdanjača Cave	15.4199444	aadr	LazaridisAlpaslanRoodenbergScience2022
I18729	3100	Croatia	Croatia_MLBA	44.8520052	Bezdanjača Cave	15.4199444	aadr	LazaridisAlpaslanRoodenbergScience2022
I18730	3100	Croatia	Croatia_MLBA	44.8520052	Bezdanjača Cave	15.4199444	aadr	LazaridisAlpaslanRoodenbergScience2022
I18732	3100	Croatia	Croatia_MLBA	44.8520052	Bezdanjača Cave	15.4199444	aadr	LazaridisAlpaslanRoodenbergScience2022
I18734	3100	Croatia	Croatia_MLBA	44.8520052	Bezdanjača Cave	15.4199444	aadr	LazaridisAlpaslanRoodenbergScience2022
I18737	3100	Croatia	Croatia_MLBA	44.8520052	Bezdanjača Cave	15.4199444	aadr	LazaridisAlpaslanRoodenbergScience2022
I18738	3100	Croatia	Croatia_MLBA	44.8520052	Bezdanjača Cave	15.4199444	aadr	LazaridisAlpaslanRoodenbergScience2022
I18739	3100	Croatia	Croatia_MLBA	44.8520052	Bezdanjača Cave	15.4199444	aadr	LazaridisAlpaslanRoodenbergScience2022
I18719	3100	Croatia	Croatia_MLBA_alt	44.8520052	Bezdanjača Cave	15.4199444	aadr	PattersonNature2021
I18717	3100	Croatia	Croatia_MLBA_brotherI18078fatherI18071	44.8520052	Bezdanjača Cave	15.4199444	aadr	LazaridisAlpaslanRoodenbergScience2022
I26738	7125	Croatia	Croatia_MN	45.14585	Gornja Vrba-Savsko polje	18.061342	aadr	PattersonNature2021
I26741	6585	Croatia	Croatia_MN_Sopot	45.55101	Osijek-Hermanov vinograd	18.746617	aadr	PattersonNature2021
I3498	7681	Croatia	Croatia_MN_Sopot	45.338767	Beli Manastir-Popova zemlja	18.698861	aadr	MathiesonNature2018
I5077	7001	Croatia	Croatia_MN_Sopot	45.55101	Osijek, Hermanov Vinograd	18.746617	aadr	MathiesonNature2018
I5078	6571	Croatia	Croatia_MN_Sopot	45.55101	Osijek, Hermanov Vinograd	18.746617	aadr	MathiesonNature2018
I7399	7078	Croatia	Croatia_MN_Sopot	45.300857	Vinkovci, Vinka	18.779447	aadr	LazaridisAlpaslanRoodenbergScience2022
I10055	7727	Croatia	Croatia_N	45.4482	Potočani	17.6388	aadr	NovakPLoSOne2021
I3433	7800	Croatia	Croatia_N_Cardial	43.589	Zemunica Cave	16.648	aadr	MathiesonNature2018
I3947	7834	Croatia	Croatia_N_Cardial	43.589	Zemunica Cave	16.648	aadr	MathiesonNature2018
I3948	7863	Croatia	Croatia_N_Cardial	43.589	Zemunica Cave	16.648	aadr	MathiesonNature2018
I5079	5421	Croatia	Croatia_N_Starcevo	45.488514	Radovanci	17.641285	aadr	MathiesonNature2018
I7949	3022	Czech Republic	Czech_BA_Veterov_2	50.548056	Bilina	13.776111	aadr	NarasimhanPattersonScience2019
HOP001	4240	Czech Republic	Czech_BellBeaker	50.080377	Bohemia, Hostivice	14.27686	aadr	PapacScienceAdvances2021
HOP003	4250	Czech Republic	Czech_BellBeaker	50.080377	Bohemia, Hostivice	14.27686	aadr	PapacScienceAdvances2021
I4885	4170	Czech Republic	Czech_BellBeaker	50.1217475	Prague 8, Kobylisy, Ke Stírce Street	14.4569508	aadr	OlaldeNature2018
I4886	4088	Czech Republic	Czech_BellBeaker	50.1217475	Prague 8, Kobylisy, Ke Stírce Street	14.4569508	aadr	OlaldeNature2018
I4888	4038	Czech Republic	Czech_BellBeaker	50.1217475	Prague 8, Kobylisy, Ke Stírce Street	14.4569508	aadr	OlaldeNature2018
I4889	4131	Czech Republic	Czech_BellBeaker	50.1217475	Prague 8, Kobylisy, Ke Stírce Street	14.4569508	aadr	OlaldeNature2018
I4891	4131	Czech Republic	Czech_BellBeaker	50.1217475	Prague 8, Kobylisy, Ke Stírce Street	14.4569508	aadr	OlaldeNature2018
I4895	4106	Czech Republic	Czech_BellBeaker	50.0504153	Prague 5, Jinonice, Butovická Street	14.3667267	aadr	OlaldeNature2018
I4896	4163	Czech Republic	Czech_BellBeaker	50.0504153	Prague 5, Jinonice, Butovická Street	14.3667267	aadr	OlaldeNature2018
I4945	4177	Czech Republic	Czech_BellBeaker	50.1217475	Prague 8, Kobylisy, Ke Stírce Street	14.4569508	aadr	OlaldeNature2018
I4946	4188	Czech Republic	Czech_BellBeaker	50.0504153	Prague 5, Jinonice, Butovická Street	14.3667267	aadr	OlaldeNature2018
I5514	4155	Czech Republic	Czech_BellBeaker	50.0504153	Prague 5, Jinonice, Butovická Street	14.3667267	aadr	OlaldeNature2018
I6480	4150	Czech Republic	Czech_BellBeaker	50.166667	Velké Přílepy	14.316667	aadr	OlaldeNature2018
I7205	4200	Czech Republic	Czech_BellBeaker	50.410265	Radosevice	14.074597	aadr	OlaldeNature2018
I7211	4183	Czech Republic	Czech_BellBeaker	50.410265	Radosevice	14.074597	aadr	OlaldeNature2018
I7212	4247	Czech Republic	Czech_BellBeaker	50.410265	Radosevice	14.074597	aadr	OlaldeNature2018
I7213	4231	Czech Republic	Czech_BellBeaker	50.410265	Radosevice	14.074597	aadr	OlaldeNature2018
I7214	4200	Czech Republic	Czech_BellBeaker	50.410265	Radosevice	14.074597	aadr	OlaldeNature2018
I7249	4011	Czech Republic	Czech_BellBeaker	50.19	Brandýsek	14.158	aadr	OlaldeNature2018
I7251	4200	Czech Republic	Czech_BellBeaker	50.19	Brandýsek	14.158	aadr	OlaldeNature2018
I7269	4200	Czech Republic	Czech_BellBeaker	50.19	Brandýsek	14.158	aadr	OlaldeNature2018
I7275	4200	Czech Republic	Czech_BellBeaker	50.19	Brandýsek	14.158	aadr	OlaldeNature2018
I7276	4200	Czech Republic	Czech_BellBeaker	50.19	Brandýsek	14.158	aadr	OlaldeNature2018
I7278	4333	Czech Republic	Czech_BellBeaker	50.19	Brandýsek	14.158	aadr	OlaldeNature2018
I7281	4194	Czech Republic	Czech_BellBeaker	50.044984	Prague 5 - Malá Ohrada	14.339296	aadr	OlaldeNature2018
I7282	4200	Czech Republic	Czech_BellBeaker	50.410265	Radosevice	14.074597	aadr	OlaldeNature2018
I7286	4221	Czech Republic	Czech_BellBeaker	50.410265	Radosevice	14.074597	aadr	OlaldeNature2018
I7287	4200	Czech Republic	Czech_BellBeaker	50.410265	Radosevice	14.074597	aadr	OlaldeNature2018
I7290	4200	Czech Republic	Czech_BellBeaker	50.410265	Radosevice	14.074597	aadr	OlaldeNature2018
KO1003	4160	Czech Republic	Czech_BellBeaker	50.025608	Bohemia, Kolín II	15.169166	aadr	PapacScienceAdvances2021
KO1004	4166	Czech Republic	Czech_BellBeaker	50.025608	Bohemia, Kolín II	15.169166	aadr	PapacScienceAdvances2021
KO1005	4331	Czech Republic	Czech_BellBeaker	50.025608	Bohemia, Kolín II	15.169166	aadr	PapacScienceAdvances2021
KOP002	4250	Czech Republic	Czech_BellBeaker	50.011045	Bohemia, Kolín VI	15.213159	aadr	PapacScienceAdvances2021
KOP003	4342	Czech Republic	Czech_BellBeaker	50.011045	Bohemia, Kolín VI	15.213159	aadr	PapacScienceAdvances2021
PRU002	4470	Czech Republic	Czech_BellBeaker	50.078134	Bohemia	14.312195	aadr	PapacScienceAdvances2021
PRU003	4427	Czech Republic	Czech_BellBeaker	50.078134	Bohemia	14.312195	aadr	PapacScienceAdvances2021
PRU005	4350	Czech Republic	Czech_BellBeaker	50.078134	Bohemia	14.312195	aadr	PapacScienceAdvances2021
VLI024	4150	Czech Republic	Czech_BellBeaker	50.365945	Bohemia, Vliněves	14.446606	aadr	PapacScienceAdvances2021
VLI026	4150	Czech Republic	Czech_BellBeaker	50.365945	Bohemia, Vliněves	14.446606	aadr	PapacScienceAdvances2021
VLI029	4150	Czech Republic	Czech_BellBeaker	50.365945	Bohemia, Vliněves	14.446606	aadr	PapacScienceAdvances2021
I4887	4071	Czech Republic	Czech_BellBeaker_brotherI4888	50.1217475	Prague 8, Kobylisy, Ke Stírce Street	14.4569508	aadr	OlaldeNature2018
I7210	4071	Czech Republic	Czech_BellBeaker_fatherorsonI7212	50.410265	Radosevice	14.074597	aadr	OlaldeNature2018
I7283	4200	Czech Republic	Czech_BellBeaker_motherI7282	50.410265	Radosevice	14.074597	aadr	OlaldeNature2018
PRU001	4331	Czech Republic	Czech_BellBeaker_oAnatolia1	50.078134	Bohemia	14.312195	aadr	PapacScienceAdvances2021
HOP004	4222	Czech Republic	Czech_BellBeaker_oAnatolia2	50.080377	Bohemia, Hostivice	14.27686	aadr	PapacScienceAdvances2021
KOP001	4250	Czech Republic	Czech_BellBeaker_oAnatolia2	50.011045	Bohemia, Kolín VI	15.213159	aadr	PapacScienceAdvances2021
PRU004	4264	Czech Republic	Czech_BellBeaker_oSteppe	50.078134	Bohemia	14.312195	aadr	PapacScienceAdvances2021
TIS002	4470	Czech Republic	Czech_BellBeaker_oSteppe	50.283392	Bohemia, Tišice	14.539446	aadr	PapacScienceAdvances2021
I7289	4289	Czech Republic	Czech_BellBeaker_siblingI7214	50.410265	Radosevice	14.074597	aadr	OlaldeNature2018
I15823	5550	Czech Republic	Czech_C	50.054385	Central Bohemia, Prague 5, Prague-Jinonice (Holmanʼs Garden Centre)	14.363387	aadr	PattersonNature2021
I17310	5397	Czech Republic	Czech_C	50.556196	NW Bohemia, Teplice, Bílina (Titzler)	13.763549	aadr	PattersonNature2021
I14167	5850	Czech Republic	Czech_C_Baalberge	50.145766	Makotrasy	14.221421	aadr	PapacScienceAdvances2021
I14169	5850	Czech Republic	Czech_C_Baalberge	50.145766	Makotrasy	14.221421	aadr	PapacScienceAdvances2021
I14170	5850	Czech Republic	Czech_C_Baalberge	50.145766	Makotrasy	14.221421	aadr	PapacScienceAdvances2021
I14171	5850	Czech Republic	Czech_C_Baalberge	50.145766	Makotrasy	14.221421	aadr	PapacScienceAdvances2021
I14172	5850	Czech Republic	Czech_C_Baalberge	50.145766	Makotrasy	14.221421	aadr	PapacScienceAdvances2021
I14173	5850	Czech Republic	Czech_C_Baalberge	50.145766	Makotrasy	14.221421	aadr	PapacScienceAdvances2021
I14174	5850	Czech Republic	Czech_C_Baalberge	50.145766	Makotrasy	14.221421	aadr	PapacScienceAdvances2021
I14175	5850	Czech Republic	Czech_C_Baalberge	50.145766	Makotrasy	14.221421	aadr	PapacScienceAdvances2021
I14176	5550	Czech Republic	Czech_C_Baalberge	50.145766	Makotrasy	14.221421	aadr	PapacScienceAdvances2021
I16121	5850	Czech Republic	Czech_C_Baalberge	50.145766	Makotrasy	14.221421	aadr	PapacScienceAdvances2021
I16122	5850	Czech Republic	Czech_C_Baalberge	50.145766	Makotrasy	14.221421	aadr	PapacScienceAdvances2021
I6677	5550	Czech Republic	Czech_C_Baalberge	50.548056	Bilina	13.776111	aadr	NarasimhanPattersonScience2019
I7186	5713	Czech Republic	Czech_C_Baalberge	50.145766	Makotrasy	14.221421	aadr	PapacScienceAdvances2021
I7187	6044	Czech Republic	Czech_C_Baalberge	50.145766	Makotrasy	14.221421	aadr	PapacScienceAdvances2021
I7188	5610	Czech Republic	Czech_C_Baalberge	50.145766	Makotrasy	14.221421	aadr	PapacScienceAdvances2021
I7189	5526	Czech Republic	Czech_C_Baalberge	50.145766	Makotrasy	14.221421	aadr	PapacScienceAdvances2021
I7191	5657	Czech Republic	Czech_C_Baalberge	50.145766	Makotrasy	14.221421	aadr	PapacScienceAdvances2021
I7192	5552	Czech Republic	Czech_C_Baalberge	50.145766	Makotrasy	14.221421	aadr	PapacScienceAdvances2021
I7194	5527	Czech Republic	Czech_C_Baalberge	50.145766	Makotrasy	14.221421	aadr	PapacScienceAdvances2021
I7193	5621	Czech Republic	Czech_C_Baalberge_o1	50.145766	Makotrasy	14.221421	aadr	PapacScienceAdvances2021
I14168	5850	Czech Republic	Czech_C_Baalberge_o2	50.145766	Makotrasy	14.221421	aadr	PapacScienceAdvances2021
BUT003	4335	Czech Republic	Czech_CordedWare	50.052366	Bohemia, Praha 5 - Nové Butovice	14.344968	aadr	PapacScienceAdvances2021
CAH005	4349	Czech Republic	Czech_CordedWare	50.373091	Bohemia, Čachovice	13.365431	aadr	PapacScienceAdvances2021
CAH010	4275	Czech Republic	Czech_CordedWare	50.373091	Bohemia, Čachovice	13.365431	aadr	PapacScienceAdvances2021
DRO001	4697	Czech Republic	Czech_CordedWare	50.436881	Bohemia, Droužkovice	13.41345	aadr	PapacScienceAdvances2021
I13467	4289	Czech Republic	Czech_CordedWare	50.044984	Central Bohemia, Prague 5, Prague-Stodůlky (Malá Ohrada site)	14.339296	aadr	PattersonNature2021
I6695	4575	Czech Republic	Czech_CordedWare	50.548056	Bilina	13.776111	aadr	NarasimhanPattersonScience2019
I6696	4575	Czech Republic	Czech_CordedWare	50.542896	Velké Žernoseky	14.065942	aadr	NarasimhanPattersonScience2019
I7207	4370	Czech Republic	Czech_CordedWare	50.410265	Radosevice	14.074597	aadr	NarasimhanPattersonScience2019
I7208	4324	Czech Republic	Czech_CordedWare	50.410265	Radosevice	14.074597	aadr	NarasimhanPattersonScience2019
I7209	4269	Czech Republic	Czech_CordedWare	50.410265	Radosevice	14.074597	aadr	NarasimhanPattersonScience2019
I7279	4200	Czech Republic	Czech_CordedWare	50.19	Brandýsek	14.158	aadr	OlaldeNature2018
I7280	4200	Czech Republic	Czech_CordedWare	50.19	Brandýsek	14.158	aadr	OlaldeNature2018
KO1002	4533	Czech Republic	Czech_CordedWare	50.033343	Bohemia, Kolín I	15.168084	aadr	PapacScienceAdvances2021
KON001	4697	Czech Republic	Czech_CordedWare	50.555735	Bohemia, Konobrže	13.660563	aadr	PapacScienceAdvances2021
KON004	4398	Czech Republic	Czech_CordedWare	50.555735	Bohemia, Konobrže	13.660563	aadr	PapacScienceAdvances2021
OBR003	4835	Czech Republic	Czech_CordedWare	50.292725	Bohemia, Obříství	14.484945	aadr	PapacScienceAdvances2021
OBR004	4512	Czech Republic	Czech_CordedWare	50.292725	Bohemia, Obříství	14.484945	aadr	PapacScienceAdvances2021
OHR002	4477	Czech Republic	Czech_CordedWare	50.04618	Bohemia, Praha 5 - Malá Ohrada	14.337021	aadr	PapacScienceAdvances2021
PNL001	4843	Czech Republic	Czech_CordedWare	50.250195	Bohemia, Plotiště nad Labem	15.811275	aadr	PapacScienceAdvances2021
PNL002	4653	Czech Republic	Czech_CordedWare	50.250195	Bohemia, Plotiště nad Labem	15.811275	aadr	PapacScienceAdvances2021
RDV001	4592	Czech Republic	Czech_CordedWare	50.542303	Bohemia, Radovesice	13.843248	aadr	PapacScienceAdvances2021
STD001	4500	Czech Republic	Czech_CordedWare	50.612939	Bohemia, Stadice	13.961205	aadr	PapacScienceAdvances2021
STD002	4720	Czech Republic	Czech_CordedWare	50.612939	Bohemia, Stadice	13.961205	aadr	PapacScienceAdvances2021
TRM003	4620	Czech Republic	Czech_CordedWare	50.637938	Bohemia, Trmice	13.992275	aadr	PapacScienceAdvances2021
TRM006	4644	Czech Republic	Czech_CordedWare	50.637938	Bohemia, Trmice	13.992275	aadr	PapacScienceAdvances2021
VLI007	4739	Czech Republic	Czech_CordedWare	50.365945	Bohemia, Vliněves	14.446606	aadr	PapacScienceAdvances2021
VLI010	4483	Czech Republic	Czech_CordedWare	50.365945	Bohemia, Vliněves	14.446606	aadr	PapacScienceAdvances2021
VLI011	4718	Czech Republic	Czech_CordedWare	50.365945	Bohemia, Vliněves	14.446606	aadr	PapacScienceAdvances2021
VLI016	4345	Czech Republic	Czech_CordedWare	50.365945	Bohemia, Vliněves	14.446606	aadr	PapacScienceAdvances2021
VLI017	4336	Czech Republic	Czech_CordedWare	50.365945	Bohemia, Vliněves	14.446606	aadr	PapacScienceAdvances2021
VLI019	4500	Czech Republic	Czech_CordedWare	50.365945	Bohemia, Vliněves	14.446606	aadr	PapacScienceAdvances2021
VLI020	4446	Czech Republic	Czech_CordedWare	50.365945	Bohemia, Vliněves	14.446606	aadr	PapacScienceAdvances2021
VLI067	4718	Czech Republic	Czech_CordedWare	50.365945	Bohemia, Vliněves	14.446606	aadr	PapacScienceAdvances2021
VLI071	4715	Czech Republic	Czech_CordedWare	50.365945	Bohemia, Vliněves	14.446606	aadr	PapacScienceAdvances2021
VLI076	4906	Czech Republic	Czech_CordedWare	50.365945	Bohemia, Vliněves	14.446606	aadr	PapacScienceAdvances2021
VLI092	4719	Czech Republic	Czech_CordedWare	50.365945	Bohemia, Vliněves	14.446606	aadr	PapacScienceAdvances2021
ZEL001	4350	Czech Republic	Czech_CordedWare	50.137866	Bohemia, Zeleneč	14.659928	aadr	PapacScienceAdvances2021
STD003	4877	Czech Republic	Czech_CordedWare_o1	50.612939	Bohemia, Stadice	13.961205	aadr	PapacScienceAdvances2021
VLI008	4759	Czech Republic	Czech_CordedWare_o1	50.365945	Bohemia, Vliněves	14.446606	aadr	PapacScienceAdvances2021
VLI009	4585	Czech Republic	Czech_CordedWare_o2	50.365945	Bohemia, Vliněves	14.446606	aadr	PapacScienceAdvances2021
VLI079	4623	Czech Republic	Czech_CordedWare_o3	50.365945	Bohemia, Vliněves	14.446606	aadr	PapacScienceAdvances2021
RISE569_noUDG.SG	1229	Czech Republic	Czech_EarlySlav_dupI4137SG	50.19	Brandysek	14.158	aadr	AllentoftNature2015
I4884	3758	Czech Republic	Czech_EBA	50.1217475	Prague 8, Kobylisy, Ke Stírce Street	14.4569508	aadr	OlaldeNature2018
I4892	3754	Czech Republic	Czech_EBA	50.1217475	Prague 8, Kobylisy, Ke Stírce Street	14.4569508	aadr	OlaldeNature2018
I7195	4250	Czech Republic	Czech_EBA	50.0504153	Prague 5, Jinonice, Zahradnictví	14.3667267	aadr	OlaldeNature2018
I7196	4250	Czech Republic	Czech_EBA	50.0504153	Prague 5, Jinonice, Zahradnictví	14.3667267	aadr	OlaldeNature2018
I7198	4026	Czech Republic	Czech_EBA	50.0504153	Prague 5, Jinonice, Zahradnictví	14.3667267	aadr	OlaldeNature2018
I7199	4039	Czech Republic	Czech_EBA	50.0504153	Prague 5, Jinonice, Zahradnictví	14.3667267	aadr	OlaldeNature2018
I7200	4250	Czech Republic	Czech_EBA	50.0504153	Prague 5, Jinonice, Zahradnictví	14.3667267	aadr	OlaldeNature2018
I7201	4250	Czech Republic	Czech_EBA	50.0504153	Prague 5, Jinonice, Zahradnictví	14.3667267	aadr	OlaldeNature2018
I7202	4250	Czech Republic	Czech_EBA	50.0504153	Prague 5, Jinonice, Zahradnictví	14.3667267	aadr	OlaldeNature2018
I11158	4025	Czech Republic	Czech_EBA_sonI14193_sonI7198	50.054385	Central Bohemia, Prague 5, Prague-Jinonice (Holmanʼs Garden Centre)	14.363387	aadr	PattersonNature2021
I4139	4150	Czech Republic	Czech_EBA_Starounetice	50.166667	Velké Přílepy	14.316667	aadr	OlaldeNature2018 (known there as I5035)
RISE577_noUDG.SG	4150	Czech Republic	Czech_EBA_Starounetice_dupI4139SG	50.16	Velké Přílepy	14.311	aadr	AllentoftNature2015
BNL002	3995	Czech Republic	Czech_EBA_Unetice	50.174207	Bohemia, Brandýs nad Labem	14.646467	aadr	PapacScienceAdvances2021
BNL003	3995	Czech Republic	Czech_EBA_Unetice	50.174207	Bohemia, Brandýs nad Labem	14.646467	aadr	PapacScienceAdvances2021
BNL004	3995	Czech Republic	Czech_EBA_Unetice	50.174207	Bohemia, Brandýs nad Labem	14.646467	aadr	PapacScienceAdvances2021
BNL005	4084	Czech Republic	Czech_EBA_Unetice	50.174207	Bohemia, Brandýs nad Labem	14.646467	aadr	PapacScienceAdvances2021
BNL006	4070	Czech Republic	Czech_EBA_Unetice	50.174207	Bohemia, Brandýs nad Labem	14.646467	aadr	PapacScienceAdvances2021
BNL008	3926	Czech Republic	Czech_EBA_Unetice	50.174207	Bohemia, Brandýs nad Labem	14.646467	aadr	PapacScienceAdvances2021
CHL001	3905	Czech Republic	Czech_EBA_Unetice	50.215039	Bohemia, Chleby	15.119066	aadr	PapacScienceAdvances2021
CHL002	4000	Czech Republic	Czech_EBA_Unetice	50.215039	Bohemia, Chleby	15.119066	aadr	PapacScienceAdvances2021
CHL003	3937	Czech Republic	Czech_EBA_Unetice	50.215039	Bohemia, Chleby	15.119066	aadr	PapacScienceAdvances2021
CHL006	3897	Czech Republic	Czech_EBA_Unetice	50.215039	Bohemia, Chleby	15.119066	aadr	PapacScienceAdvances2021
CHL008	3960	Czech Republic	Czech_EBA_Unetice	50.215039	Bohemia, Chleby	15.119066	aadr	PapacScienceAdvances2021
I11159	4100	Czech Republic	Czech_EBA_Unetice	50.054385	Central Bohemia, Prague 5, Prague-Jinonice (Holmanʼs Garden Centre)	14.363387	aadr	PattersonNature2021
I13468	3950	Czech Republic	Czech_EBA_Unetice	50.044984	Central Bohemia, Prague 5, Prague-Stodůlky (Malá Ohrada site)	14.339296	aadr	PattersonNature2021
I13469	3945	Czech Republic	Czech_EBA_Unetice	50.044984	Central Bohemia, Prague 5, Prague-Stodůlky (Malá Ohrada site)	14.339296	aadr	PattersonNature2021
I13470	3943	Czech Republic	Czech_EBA_Unetice	50.044984	Central Bohemia, Prague 5, Prague-Stodůlky (Malá Ohrada site)	14.339296	aadr	PattersonNature2021
I13471	3950	Czech Republic	Czech_EBA_Unetice	50.044984	Central Bohemia, Prague 5, Prague-Stodůlky (Malá Ohrada site)	14.339296	aadr	PattersonNature2021
I14185	3850	Czech Republic	Czech_EBA_Unetice	50.054385	Central Bohemia, Prague 5, Prague-Jinonice (Holmanʼs Garden Centre)	14.363387	aadr	PattersonNature2021
I14186	3850	Czech Republic	Czech_EBA_Unetice	50.054385	Central Bohemia, Prague 5, Prague-Jinonice (Holmanʼs Garden Centre)	14.363387	aadr	PattersonNature2021
I14189	3850	Czech Republic	Czech_EBA_Unetice	50.054385	Central Bohemia, Prague 5, Prague-Jinonice (Holmanʼs Garden Centre)	14.363387	aadr	PattersonNature2021
I14191	3850	Czech Republic	Czech_EBA_Unetice	50.054385	Central Bohemia, Prague 5, Prague-Jinonice (Holmanʼs Garden Centre)	14.363387	aadr	PattersonNature2021
I14192	3850	Czech Republic	Czech_EBA_Unetice	50.054385	Central Bohemia, Prague 5, Prague-Jinonice (Holmanʼs Garden Centre)	14.363387	aadr	PattersonNature2021
I14193	3850	Czech Republic	Czech_EBA_Unetice	50.054385	Central Bohemia, Prague 5, Prague-Jinonice (Holmanʼs Garden Centre)	14.363387	aadr	PattersonNature2021
I14585	3850	Czech Republic	Czech_EBA_Unetice	50.054385	Central Bohemia, Prague 5, Prague-Jinonice (Holmanʼs Garden Centre)	14.363387	aadr	PattersonNature2021
I15642	3950	Czech Republic	Czech_EBA_Unetice	50.044984	Central Bohemia, Prague 5, Prague-Stodůlky (Malá Ohrada site)	14.339296	aadr	PattersonNature2021
I15643	3950	Czech Republic	Czech_EBA_Unetice	50.044984	Central Bohemia, Prague 5, Prague-Stodůlky (Malá Ohrada site)	14.339296	aadr	PattersonNature2021
I15644	3950	Czech Republic	Czech_EBA_Unetice	50.044984	Central Bohemia, Prague 5, Prague-Stodůlky (Malá Ohrada site)	14.339296	aadr	PattersonNature2021
I15824	3900	Czech Republic	Czech_EBA_Unetice	50.054385	Central Bohemia, Prague 5, Prague-Jinonice (Holmanʼs Garden Centre)	14.363387	aadr	PattersonNature2021
I15825	3850	Czech Republic	Czech_EBA_Unetice	50.054385	Central Bohemia, Prague 5, Prague-Jinonice (Holmanʼs Garden Centre)	14.363387	aadr	PattersonNature2021
I16109	3950	Czech Republic	Czech_EBA_Unetice	50.044984	Central Bohemia, Prague 5, Prague-Stodůlky (Malá Ohrada site)	14.339296	aadr	PattersonNature2021
I7958	3950	Czech Republic	Czech_EBA_Unetice	50.044984	Central Bohemia, Prague 5, Prague-Stodůlky (Malá Ohrada site)	14.339296	aadr	PattersonNature2021
I7959	3950	Czech Republic	Czech_EBA_Unetice	50.044984	Central Bohemia, Prague 5, Prague-Stodůlky (Malá Ohrada site)	14.339296	aadr	PattersonNature2021
I7960	3950	Czech Republic	Czech_EBA_Unetice	50.044984	Central Bohemia, Prague 5, Prague-Stodůlky (Malá Ohrada site)	14.339296	aadr	PattersonNature2021
I7962	3950	Czech Republic	Czech_EBA_Unetice	50.044984	Central Bohemia, Prague 5, Prague-Stodůlky (Malá Ohrada site)	14.339296	aadr	PattersonNature2021
I7963	3950	Czech Republic	Czech_EBA_Unetice	50.044984	Central Bohemia, Prague 5, Prague-Stodůlky (Malá Ohrada site)	14.339296	aadr	PattersonNature2021
I7964	3950	Czech Republic	Czech_EBA_Unetice	50.044984	Central Bohemia, Prague 5, Prague-Stodůlky (Malá Ohrada site)	14.339296	aadr	PattersonNature2021
KNE001	4017	Czech Republic	Czech_EBA_Unetice	50.119278	Bohemia, Kněževes	14.267059	aadr	PapacScienceAdvances2021
KNE002	4043	Czech Republic	Czech_EBA_Unetice	50.119278	Bohemia, Kněževes	14.267059	aadr	PapacScienceAdvances2021
KNE003	3971	Czech Republic	Czech_EBA_Unetice	50.119278	Bohemia, Kněževes	14.267059	aadr	PapacScienceAdvances2021
KNE007	3977	Czech Republic	Czech_EBA_Unetice	50.119278	Bohemia, Kněževes	14.267059	aadr	PapacScienceAdvances2021
KO1006	3868	Czech Republic	Czech_EBA_Unetice	50.033343	Bohemia, Kolín I	15.168084	aadr	PapacScienceAdvances2021
KO1007	3737	Czech Republic	Czech_EBA_Unetice	50.033343	Bohemia, Kolín I	15.168084	aadr	PapacScienceAdvances2021
KO1008	3805	Czech Republic	Czech_EBA_Unetice	50.033343	Bohemia, Kolín I	15.168084	aadr	PapacScienceAdvances2021
KO1009	3894	Czech Republic	Czech_EBA_Unetice	50.033343	Bohemia, Kolín I	15.168084	aadr	PapacScienceAdvances2021
KO1010	3906	Czech Republic	Czech_EBA_Unetice	50.033343	Bohemia, Kolín I	15.168084	aadr	PapacScienceAdvances2021
KO1011	3993	Czech Republic	Czech_EBA_Unetice	50.033343	Bohemia, Kolín I	15.168084	aadr	PapacScienceAdvances2021
KO1013	3914	Czech Republic	Czech_EBA_Unetice	50.033343	Bohemia, Kolín I	15.168084	aadr	PapacScienceAdvances2021
KO1014	3915	Czech Republic	Czech_EBA_Unetice	50.033343	Bohemia, Kolín I	15.168084	aadr	PapacScienceAdvances2021
KO1015	3774	Czech Republic	Czech_EBA_Unetice	50.033343	Bohemia, Kolín I	15.168084	aadr	PapacScienceAdvances2021
KO7001	3985	Czech Republic	Czech_EBA_Unetice	50.008869	Bohemia, Kolín VII	15.221727	aadr	PapacScienceAdvances2021
KO7002	4000	Czech Republic	Czech_EBA_Unetice	50.008869	Bohemia, Kolín VII	15.221727	aadr	PapacScienceAdvances2021
MIB001	3779	Czech Republic	Czech_EBA_Unetice	49.992004	Bohemia, Mikulovice	15.776861	aadr	PapacScienceAdvances2021
MIB004	3769	Czech Republic	Czech_EBA_Unetice	49.992004	Bohemia, Mikulovice	15.776861	aadr	PapacScienceAdvances2021
MIB005	3767	Czech Republic	Czech_EBA_Unetice	49.992004	Bohemia, Mikulovice	15.776861	aadr	PapacScienceAdvances2021
MIB028	3855	Czech Republic	Czech_EBA_Unetice	49.992004	Bohemia, Mikulovice	15.776861	aadr	PapacScienceAdvances2021
MIB034	3659	Czech Republic	Czech_EBA_Unetice	49.992004	Bohemia, Mikulovice	15.776861	aadr	PapacScienceAdvances2021
MIG011	3990	Czech Republic	Czech_EBA_Unetice	49.992004	Bohemia, Mikulovice	15.776861	aadr	PapacScienceAdvances2021
MIS001	3908	Czech Republic	Czech_EBA_Unetice	49.992004	Bohemia, Mikulovice	15.776861	aadr	PapacScienceAdvances2021
MIS002	3883	Czech Republic	Czech_EBA_Unetice	49.992004	Bohemia, Mikulovice	15.776861	aadr	PapacScienceAdvances2021
PDA002	4057	Czech Republic	Czech_EBA_Unetice	50.151931	Bohemia, Praha-Ďáblice	14.493838	aadr	PapacScienceAdvances2021
PMI001	4096	Czech Republic	Czech_EBA_Unetice	50.156484	Bohemia, Praha-Miškovice	14.538727	aadr	PapacScienceAdvances2021
PMI003	4005	Czech Republic	Czech_EBA_Unetice	50.156484	Bohemia, Praha-Miškovice	14.538727	aadr	PapacScienceAdvances2021
PMI004	4013	Czech Republic	Czech_EBA_Unetice	50.156484	Bohemia, Praha-Miškovice	14.538727	aadr	PapacScienceAdvances2021
PMI006	4104	Czech Republic	Czech_EBA_Unetice	50.156484	Bohemia, Praha-Miškovice	14.538727	aadr	PapacScienceAdvances2021
PMI010	3902	Czech Republic	Czech_EBA_Unetice	50.156484	Bohemia, Praha-Miškovice	14.538727	aadr	PapacScienceAdvances2021
ROU001	4000	Czech Republic	Czech_EBA_Unetice	50.416843	Bohemia, Roudnice nad Labem	14.245509	aadr	PapacScienceAdvances2021
ROU003	3995	Czech Republic	Czech_EBA_Unetice	50.416843	Bohemia, Roudnice nad Labem	14.245509	aadr	PapacScienceAdvances2021
ROU004	3995	Czech Republic	Czech_EBA_Unetice	50.416843	Bohemia, Roudnice nad Labem	14.245509	aadr	PapacScienceAdvances2021
ROU006	4000	Czech Republic	Czech_EBA_Unetice	50.416843	Bohemia, Roudnice nad Labem	14.245509	aadr	PapacScienceAdvances2021
ROU007	4000	Czech Republic	Czech_EBA_Unetice	50.416843	Bohemia, Roudnice nad Labem	14.245509	aadr	PapacScienceAdvances2021
VLI039	4000	Czech Republic	Czech_EBA_Unetice	50.365945	Bohemia, Vliněves	14.446606	aadr	PapacScienceAdvances2021
VLI045	3943	Czech Republic	Czech_EBA_Unetice	50.365945	Bohemia, Vliněves	14.446606	aadr	PapacScienceAdvances2021
VLI047	3800	Czech Republic	Czech_EBA_Unetice	50.365945	Bohemia, Vliněves	14.446606	aadr	PapacScienceAdvances2021
VLI050	3796	Czech Republic	Czech_EBA_Unetice	50.365945	Bohemia, Vliněves	14.446606	aadr	PapacScienceAdvances2021
VLI058	4066	Czech Republic	Czech_EBA_Unetice	50.365945	Bohemia, Vliněves	14.446606	aadr	PapacScienceAdvances2021
VLI060	3930	Czech Republic	Czech_EBA_Unetice	50.365945	Bohemia, Vliněves	14.446606	aadr	PapacScienceAdvances2021
VLI061	4000	Czech Republic	Czech_EBA_Unetice	50.365945	Bohemia, Vliněves	14.446606	aadr	PapacScienceAdvances2021
VLI065	3936	Czech Republic	Czech_EBA_Unetice	50.365945	Bohemia, Vliněves	14.446606	aadr	PapacScienceAdvances2021
I11160	3850	Czech Republic	Czech_EBA_Unetice_brotherI14185	50.054385	Central Bohemia, Prague 5, Prague-Jinonice (Holmanʼs Garden Centre)	14.363387	aadr	PattersonNature2021
I14188	3850	Czech Republic	Czech_EBA_Unetice_brotherI14585	50.054385	Central Bohemia, Prague 5, Prague-Jinonice (Holmanʼs Garden Centre)	14.363387	aadr	PattersonNature2021
MIB002	3765	Czech Republic	Czech_EBA_Unetice_daughterMIB062	49.992004	Bohemia, Mikulovice	15.776861	aadr	PapacScienceAdvances2021
PDA005	4164	Czech Republic	Czech_EBA_Unetice_fatherorsonPDA002	50.151931	Bohemia, Praha-Ďáblice	14.493838	aadr	PapacScienceAdvances2021
ROU005	4000	Czech Republic	Czech_EBA_Unetice_fatherorsonROU007	50.416843	Bohemia, Roudnice nad Labem	14.245509	aadr	PapacScienceAdvances2021
ROU002	3997	Czech Republic	Czech_EBA_Unetice_motherordaughterROU003motherordaughterROU004	50.416843	Bohemia, Roudnice nad Labem	14.245509	aadr	PapacScienceAdvances2021
VLI051	3721	Czech Republic	Czech_EBA_Unetice_o	50.365945	Bohemia, Vliněves	14.446606	aadr	PapacScienceAdvances2021
PDA001	4017	Czech Republic	Czech_EBA_Unetice_sisterPDA002	50.151931	Bohemia, Praha-Ďáblice	14.493838	aadr	PapacScienceAdvances2021
PDA003	4131	Czech Republic	Czech_EBA_Unetice_sisterPDA002	50.151931	Bohemia, Praha-Ďáblice	14.493838	aadr	PapacScienceAdvances2021
PDA004	4053	Czech Republic	Czech_EBA_Unetice_sisterPDA002	50.151931	Bohemia, Praha-Ďáblice	14.493838	aadr	PapacScienceAdvances2021
I15646	3950	Czech Republic	Czech_EBA_Unetice_sonI13470	50.044984	Central Bohemia, Prague 5, Prague-Stodůlky (Malá Ohrada site)	14.339296	aadr	PattersonNature2021
I16538	3975	Czech Republic	Czech_EMBA	50.400094	NW Bohemia, Louny, Březno u Loun	13.42304	aadr	PattersonNature2021
I15818	7200	Czech Republic	Czech_EN_LBK	50.590618	NW Bohemia, Teplice, Bžany	13.876321	aadr	PattersonNature2021
I7272	5417	Czech Republic	Czech_Eneolithic	50.19	Brandýsek	14.158	aadr	OlaldeNature2018
I7953	2239	Czech Republic	Czech_IA	50.106753	NW Bohemia, Ústí nad Labem, Hrbovice	15.787564	aadr	PattersonNature2021
I14980	2625	Czech Republic	Czech_IA_Hallstatt	50.511157	NW Bohemia, Litoměřice, Lovosice	14.063419	aadr	PattersonNature2021
I14983	2625	Czech Republic	Czech_IA_Hallstatt	50.511157	NW Bohemia, Litoměřice, Lovosice	14.063419	aadr	PattersonNature2021
I16088	2593	Czech Republic	Czech_IA_Hallstatt	50.336647	NW Bohemia, Chomutov, Poláky	13.350577	aadr	PattersonNature2021
I16327	2592	Czech Republic	Czech_IA_Hallstatt	50.291389	NW Bohemia, Louny, Stradonice	14.045556	aadr	PattersonNature2021
DA111_noUDG.SG	2752	Czech Republic	Czech_IA_HallstattSG	50.5099972	..	14.05	aadr	DamgaardNature2018
I13780	2250	Czech Republic	Czech_IA_LaTene	50.054385	Central Bohemia, Prague 5, Prague-Jinonice (Holmanʼs Garden Centre)	14.363387	aadr	PattersonNature2021
I14984	2270	Czech Republic	Czech_IA_LaTene	50.410265	NW Bohemia, Teplice, Radosevice (Cemetery I)	14.074597	aadr	PattersonNature2021
I14985	2225	Czech Republic	Czech_IA_LaTene	50.410265	NW Bohemia, Teplice, Radosevice (Cemetery I)	14.074597	aadr	PattersonNature2021
I14986	2255	Czech Republic	Czech_IA_LaTene	50.410265	NW Bohemia, Teplice, Radosevice (Cemetery I)	14.074597	aadr	PattersonNature2021
I14987	2255	Czech Republic	Czech_IA_LaTene	50.410265	NW Bohemia, Teplice, Radosevice (Cemetery I)	14.074597	aadr	PattersonNature2021
I15039	2185	Czech Republic	Czech_IA_LaTene	50.410265	NW Bohemia, Teplice, Radosevice (Cemetery II)	14.074597	aadr	PattersonNature2021
I15040	2240	Czech Republic	Czech_IA_LaTene	50.410265	NW Bohemia, Teplice, Radosevice (Cemetery II)	14.074597	aadr	PattersonNature2021
I15042	2225	Czech Republic	Czech_IA_LaTene	50.410265	NW Bohemia, Teplice, Radosevice (Cemetery II)	14.074597	aadr	PattersonNature2021
I15043	2240	Czech Republic	Czech_IA_LaTene	50.410265	NW Bohemia, Teplice, Radosevice (Cemetery II)	14.074597	aadr	PattersonNature2021
I15044	2230	Czech Republic	Czech_IA_LaTene	50.410265	NW Bohemia, Teplice, Radosevice (Cemetery II)	14.074597	aadr	PattersonNature2021
I15045	2255	Czech Republic	Czech_IA_LaTene	50.410265	NW Bohemia, Teplice, Radosevice (Cemetery II)	14.074597	aadr	PattersonNature2021
I15046	2256	Czech Republic	Czech_IA_LaTene	50.410265	NW Bohemia, Teplice, Radosevice (Cemetery II)	14.074597	aadr	PattersonNature2021
I15047	2170	Czech Republic	Czech_IA_LaTene	50.410265	NW Bohemia, Teplice, Radosevice (Cemetery II)	14.074597	aadr	PattersonNature2021
I15048	2385	Czech Republic	Czech_IA_LaTene	50.410265	NW Bohemia, Teplice, Radosevice (Cemetery II)	14.074597	aadr	PattersonNature2021
I15049	2275	Czech Republic	Czech_IA_LaTene	50.410265	NW Bohemia, Teplice, Radosevice (Cemetery II)	14.074597	aadr	PattersonNature2021
I15950	2385	Czech Republic	Czech_IA_LaTene	50.410265	NW Bohemia, Teplice, Radosevice (Cemetery II)	14.074597	aadr	PattersonNature2021
I15951	2235	Czech Republic	Czech_IA_LaTene	50.410265	NW Bohemia, Teplice, Radosevice (Cemetery II)	14.074597	aadr	PattersonNature2021
I15952	2310	Czech Republic	Czech_IA_LaTene	50.410265	NW Bohemia, Teplice, Radosevice (Cemetery II)	14.074597	aadr	PattersonNature2021
I15954	2305	Czech Republic	Czech_IA_LaTene	50.410265	NW Bohemia, Teplice, Radosevice (Cemetery II)	14.074597	aadr	PattersonNature2021
I16268	2250	Czech Republic	Czech_IA_LaTene	50.054385	Central Bohemia, Prague 5, Prague-Jinonice (Holmanʼs Garden Centre)	14.363387	aadr	PattersonNature2021
I16271	2250	Czech Republic	Czech_IA_LaTene	50.054385	Central Bohemia, Prague 5, Prague-Jinonice (Holmanʼs Garden Centre)	14.363387	aadr	PattersonNature2021
I16272	2239	Czech Republic	Czech_IA_LaTene	50.054385	Central Bohemia, Prague 5, Prague-Jinonice (Holmanʼs Garden Centre)	14.363387	aadr	PattersonNature2021
I16273	2046	Czech Republic	Czech_IA_LaTene	50.054385	Central Bohemia, Prague 5, Prague-Jinonice (Holmanʼs Garden Centre)	14.363387	aadr	PattersonNature2021
I17139	2220	Czech Republic	Czech_IA_LaTene	50.410265	NW Bohemia, Teplice, Radosevice (Cemetery I)	14.074597	aadr	PattersonNature2021
I17143	2220	Czech Republic	Czech_IA_LaTene	50.410265	NW Bohemia, Teplice, Radosevice (Cemetery I)	14.074597	aadr	PattersonNature2021
I17145	2255	Czech Republic	Czech_IA_LaTene	50.410265	NW Bohemia, Teplice, Radosevice (Cemetery I)	14.074597	aadr	PattersonNature2021
I17146	2197	Czech Republic	Czech_IA_LaTene	50.410265	NW Bohemia, Teplice, Radosevice (Cemetery I)	14.074597	aadr	PattersonNature2021
I17314	2250	Czech Republic	Czech_IA_LaTene	50.054385	Central Bohemia, Prague 5, Prague-Jinonice (Holmanʼs Garden Centre)	14.363387	aadr	PattersonNature2021
I17317	2250	Czech Republic	Czech_IA_LaTene	50.054385	Central Bohemia, Prague 5, Prague-Jinonice (Holmanʼs Garden Centre)	14.363387	aadr	PattersonNature2021
I17321	2225	Czech Republic	Czech_IA_LaTene	50.054385	Central Bohemia, Prague 5, Prague-Jinonice (Holmanʼs Garden Centre)	14.363387	aadr	PattersonNature2021
I17322	2250	Czech Republic	Czech_IA_LaTene	50.054385	Central Bohemia, Prague 5, Prague-Jinonice (Holmanʼs Garden Centre)	14.363387	aadr	PattersonNature2021
I17323	2250	Czech Republic	Czech_IA_LaTene	50.054385	Central Bohemia, Prague 5, Prague-Jinonice (Holmanʼs Garden Centre)	14.363387	aadr	PattersonNature2021
I17327	2250	Czech Republic	Czech_IA_LaTene	50.054385	Central Bohemia, Prague 5, Prague-Jinonice (Holmanʼs Garden Centre)	14.363387	aadr	PattersonNature2021
I20522	2230	Czech Republic	Czech_IA_LaTene	50.054385	Central Bohemia, Prague 5, Prague-Jinonice (Holmanʼs Garden Centre)	14.363387	aadr	PattersonNature2021
I14988	2255	Czech Republic	Czech_IA_LaTene_fatherorsonI17142	50.410265	NW Bohemia, Teplice, Radosevice (Cemetery I)	14.074597	aadr	PattersonNature2021
I16090	2350	Czech Republic	Czech_IA_LaTene_Hallstatt	50.083333	Central Bohemia, Prague 6, Prague-Ruzyně	14.316667	aadr	PattersonNature2021
I15953	2185	Czech Republic	Czech_IA_LaTene_motherordaughterI15039	50.410265	NW Bohemia, Teplice, Radosevice (Cemetery II)	14.074597	aadr	PattersonNature2021
I13781	2977	Czech Republic	Czech_LBA_IA_Knoviz_Hallstatt	50.556196	NW Bohemia, Teplice, Bílina (Rudiay I/Maxim Gorkij)	13.763549	aadr	PattersonNature2021
I13791	2975	Czech Republic	Czech_LBA_IA_Knoviz_Hallstatt	50.556196	NW Bohemia, Teplice, Bílina (Rudiay I/Maxim Gorkij)	13.763549	aadr	PattersonNature2021
I17311	2975	Czech Republic	Czech_LBA_IA_Knoviz_Hallstatt	50.556196	NW Bohemia, Teplice, Bílina (Rudiay I/Maxim Gorkij)	13.763549	aadr	PattersonNature2021
I13783	3022	Czech Republic	Czech_LBA_Knoviz	50.07884	Central Bohemia, Prague-West, Hostivice-Palouky	14.280243	aadr	PattersonNature2021
I13787	2958	Czech Republic	Czech_LBA_Knoviz	50.07884	Central Bohemia, Prague-West, Hostivice-Palouky	14.280243	aadr	PattersonNature2021
I13788	3000	Czech Republic	Czech_LBA_Knoviz	50.511285	NW Bohemia, Teplice, Chouč	13.767871	aadr	PattersonNature2021
I13789	3000	Czech Republic	Czech_LBA_Knoviz	50.556196	NW Bohemia, Teplice, Bílina (Büschel)	13.763549	aadr	PattersonNature2021
I13792	3000	Czech Republic	Czech_LBA_Knoviz	50.511285	NW Bohemia, Teplice, Chouč	13.767871	aadr	PattersonNature2021
I13793	3000	Czech Republic	Czech_LBA_Knoviz	50.511285	NW Bohemia, Teplice, Chouč	13.767871	aadr	PattersonNature2021
I13795	3035	Czech Republic	Czech_LBA_Knoviz	50.533635	Konobrže	13.61765	aadr	PattersonNature2021
I13796	3000	Czech Republic	Czech_LBA_Knoviz	50.511285	NW Bohemia, Teplice, Chouč	13.767871	aadr	PattersonNature2021
I13798	3050	Czech Republic	Czech_LBA_Knoviz	50.07884	Central Bohemia, Prague-West, Hostivice-Palouky	14.280243	aadr	PattersonNature2021
I13799	3050	Czech Republic	Czech_LBA_Knoviz	50.07884	Central Bohemia, Prague-West, Hostivice-Palouky	14.280243	aadr	PattersonNature2021
I15041	3050	Czech Republic	Czech_LBA_Knoviz	50.07884	Central Bohemia, Prague-West, Hostivice-Palouky	14.280243	aadr	PattersonNature2021
I15955	3059	Czech Republic	Czech_LBA_Knoviz	50.07884	Central Bohemia, Prague-West, Hostivice-Palouky	14.280243	aadr	PattersonNature2021
I15956	3050	Czech Republic	Czech_LBA_Knoviz	50.07884	Central Bohemia, Prague-West, Hostivice-Palouky	14.280243	aadr	PattersonNature2021
I15957	3050	Czech Republic	Czech_LBA_Knoviz	50.07884	Central Bohemia, Prague-West, Hostivice-Palouky	14.280243	aadr	PattersonNature2021
I15958	3050	Czech Republic	Czech_LBA_Knoviz	50.07884	Central Bohemia, Prague-West, Hostivice-Palouky	14.280243	aadr	PattersonNature2021
I15959	3022	Czech Republic	Czech_LBA_Knoviz	50.07884	Central Bohemia, Prague-West, Hostivice-Palouky	14.280243	aadr	PattersonNature2021
I15960	3050	Czech Republic	Czech_LBA_Knoviz	50.07884	Central Bohemia, Prague-West, Hostivice-Palouky	14.280243	aadr	PattersonNature2021
I16089	3000	Czech Republic	Czech_LBA_Knoviz	50.511285	NW Bohemia, Teplice, Chouč	13.767871	aadr	PattersonNature2021
I16182	3050	Czech Republic	Czech_LBA_Knoviz	50.07884	Central Bohemia, Prague-West, Hostivice-Palouky	14.280243	aadr	PattersonNature2021
I16549	2868	Czech Republic	Czech_LBA_Knoviz	50.060183	Praha 5, Zličín	14.279389	aadr	PattersonNature2021
I20517	3000	Czech Republic	Czech_LBA_Knoviz	50.060183	Central Bohemia, Prague 5, Zličín	14.279389	aadr	PattersonNature2021
I13786	3050	Czech Republic	Czech_LBA_Knoviz_o3	50.07884	Central Bohemia, Prague-West, Hostivice-Palouky	14.280243	aadr	PattersonNature2021
I13794	3050	Czech Republic	Czech_LBA_Knoviz_o3	50.07884	Central Bohemia, Prague-West, Hostivice-Palouky	14.280243	aadr	PattersonNature2021
I15961	3050	Czech Republic	Czech_LBA_Knoviz_o3	50.07884	Central Bohemia, Prague-West, Hostivice-Palouky	14.280243	aadr	PattersonNature2021
I16099	3325	Czech Republic	Czech_MBA_Tumulus	50.533635	NW Bohemia, Most, Konobrže	13.61765	aadr	PattersonNature2021
I16100	3325	Czech Republic	Czech_MBA_Tumulus	50.533635	NW Bohemia, Most, Konobrže	13.61765	aadr	PattersonNature2021
I16111	3325	Czech Republic	Czech_MBA_Tumulus	50.533635	NW Bohemia, Most, Konobrže	13.61765	aadr	PattersonNature2021
I16112	3325	Czech Republic	Czech_MBA_Tumulus	50.533635	NW Bohemia, Most, Konobrže	13.61765	aadr	PattersonNature2021
I16113	1462	Czech Republic	Czech_Medieval	50.533635	NW Bohemia, Most, Konobrže	13.61765	aadr	PattersonNature2021
I14190	6450	Czech Republic	Czech_MN	50.054385	Central Bohemia, Prague 5, Prague-Jinonice (Holmanʼs Garden Centre)	14.363387	aadr	PattersonNature2021
I7197	6438	Czech Republic	Czech_MN	50.0504153	Prague 5, Jinonice, Zahradnictví	14.3667267	aadr	OlaldeNature2018
kol6_noUDG.SG	6775	Czech Republic	Czech_MNSG	50.028889	Kolín	15.201157	aadr	SanchezQuintoPNAS2019
I17313	199	Czech Republic	Czech_Modern	50.054385	Central Bohemia, Prague 5, Prague-Jinonice (Holmanʼs Garden Centre)	14.363387	aadr	PattersonNature2021
I15648	5397	Czech Republic	Czech_N	49.991622	N Bohemia, Mladá Boleslav, Mužský-Hrada (Hrada site, Dneboh cadastre)	14.162575	aadr	PattersonNature2021
I16092	5385	Czech Republic	Czech_N	50.37752	NW Bohemia, Louny, Dobroměřice	13.791255	aadr	PattersonNature2021
I4893	6345	Czech Republic	Czech_N	50.1217475	Prague 8, Kobylisy, Ke Stírce Street	14.4569508	aadr	OlaldeNature2018
I4894	6371	Czech Republic	Czech_N	50.1217475	Prague 8, Kobylisy, Ke Stírce Street	14.4569508	aadr	OlaldeNature2018
I7952	7200	Czech Republic	Czech_N	50.080832	Central Bohemia, Prague-West, Hostivice-Sadová	14.245241	aadr	PattersonNature2021
HOL002	5140	Czech Republic	Czech_N_Baden	50.200564	Bohemia, Holubice	14.29025	aadr	PapacScienceAdvances2021
HOL004	5154	Czech Republic	Czech_N_Baden	50.200564	Bohemia, Holubice	14.29025	aadr	PapacScienceAdvances2021
BLS002	4692	Czech Republic	Czech_N_GlobularAmphora	50.351064	Bohemia, Blšany	13.852118	aadr	PapacScienceAdvances2021
PRE001	4625	Czech Republic	Czech_N_GlobularAmphora	50.252119	Bohemia, Předměřice	15.811875	aadr	PapacScienceAdvances2021
VLI031	4510	Czech Republic	Czech_N_GlobularAmphora	50.365945	Bohemia, Vliněves	14.446606	aadr	PapacScienceAdvances2021
BLS001	4675	Czech Republic	Czech_N_GlobularAmphora_motherordaughterBLS002	50.351064	Bohemia, Blšany	13.852118	aadr	PapacScienceAdvances2021
NER001	6076	Czech Republic	Czech_N_Jordanow	50.268076	Bohemia, Neratovice	14.523173	aadr	PapacScienceAdvances2021
TUC007	6080	Czech Republic	Czech_N_Jordanow	50.137677	Bohemia, Tuchoměřice	14.273411	aadr	PapacScienceAdvances2021
VLI004	6141	Czech Republic	Czech_N_Jordanow	50.365945	Bohemia, Vliněves	14.446606	aadr	PapacScienceAdvances2021
I7950	5398	Czech Republic	Czech_N_oWHG	50.07884	Central Bohemia, Prague-West, Hostivice-Palouky	14.280243	aadr	PattersonNature2021
I7951	7200	Czech Republic	Czech_N_oWHG	50.080832	Central Bohemia, Prague-West, Hostivice-Sadová	14.245241	aadr	PattersonNature2021
I15650	3058	Czech Republic	Czech_N_possible	50.07884	Central Bohemia, Prague-West, Hostivice-Palouky	14.280243	aadr	PattersonNature2021
KO1016	4750	Czech Republic	Czech_N_Rivnac	50.033343	Bohemia, Kolín I	15.168084	aadr	PapacScienceAdvances2021
TOU001	4712	Czech Republic	Czech_N_Rivnac	50.167736	Bohemia, Toušeň	14.722575	aadr	PapacScienceAdvances2021
TUC004	4940	Czech Republic	Czech_N_Rivnac	50.137677	Bohemia, Tuchoměřice	14.273411	aadr	PapacScienceAdvances2021
TUC005	4940	Czech Republic	Czech_N_Rivnac	50.137677	Bohemia, Tuchoměřice	14.273411	aadr	PapacScienceAdvances2021
TUC006	4879	Czech Republic	Czech_N_Rivnac	50.137677	Bohemia, Tuchoměřice	14.273411	aadr	PapacScienceAdvances2021
VPR001	4756	Czech Republic	Czech_N_Rivnac	50.155159	Bohemia, Velké Přílepy	14.318068	aadr	PapacScienceAdvances2021
TUC002	4932	Czech Republic	Czech_N_Rivnac_oAnatolia	50.137677	Bohemia, Tuchoměřice	14.273411	aadr	PapacScienceAdvances2021
TUC003	4940	Czech Republic	Czech_N_Rivnac_oWHG	50.137677	Bohemia, Tuchoměřice	14.273411	aadr	PapacScienceAdvances2021
TUC001	4940	Czech Republic	Czech_N_Rivnac_sisterTUC004	50.137677	Bohemia, Tuchoměřice	14.273411	aadr	PapacScienceAdvances2021
BRZ002	5521	Czech Republic	Czech_N_TRB	50.3575	Bohemia, Březno u Loun	13.743611	aadr	PapacScienceAdvances2021
HOL001	5613	Czech Republic	Czech_N_TRB	50.200564	Bohemia, Holubice	14.29025	aadr	PapacScienceAdvances2021
KOB002	5630	Czech Republic	Czech_N_TRB	50.00873	Bohemia, Kolín-Šťáralka	15.23091	aadr	PapacScienceAdvances2021
S_Czech-2.DG	0	Czech Republic	CzechDG	50.1	Pre-1989	14.4	aadr	MallickNature2016
RISE1281_noUDG.SG	4226	Denmark	Denmark_Djursland_SingleGraveCultureSG	56.5	Eastern Jutland, Djursland, Gjerrild Cist	10.82	aadr	EgfjordAllentoftPLOS2021
VK297_noUDG.SG	1200	Denmark	Denmark_EarlyVikingSG	55.15	Sealand, Hundstrup Mose	11.87	aadr	MargaryanWillerslevNature2020
VK65_noUDG.SG	1100	Denmark	Denmark_EarlyVikingSG	55.87	Sealand, Tollemosegard	12.08	aadr	MargaryanWillerslevNature2020
VK69_noUDG.SG	1100	Denmark	Denmark_EarlyVikingSG	55.87	Sealand, Tollemosegard	12.08	aadr	MargaryanWillerslevNature2020
VK70_noUDG.SG	1100	Denmark	Denmark_EarlyVikingSG	55.87	Sealand, Tollemosegard	12.08	aadr	MargaryanWillerslevNature2020
VK521_noUDG.SG	1650	Denmark	Denmark_IASG	55.635879	Sealand, Brondsager Torsiinre	12.241361	aadr	MargaryanWillerslevNature2020
VK532_noUDG.SG	1850	Denmark	Denmark_IASG	55.655463	Sealand, Kragehave Odetofter	12.245129	aadr	MargaryanWillerslevNature2020
VK317_noUDG.SG	1000	Denmark	Denmark_Viking_o1SG	54.85	Langeland, Kaagarden	10.78	aadr	MargaryanWillerslevNature2020
VK134_noUDG.SG	1000	Denmark	Denmark_Viking_o2SG	55.5	Funen, Galgedil	10.33	aadr	MargaryanWillerslevNature2020
VK139_noUDG.SG	1000	Denmark	Denmark_VikingSG	55.5	Funen, Galgedil	10.33	aadr	MargaryanWillerslevNature2020
VK141_noUDG.SG	1000	Denmark	Denmark_VikingSG	55.5	Funen, Galgedil	10.33	aadr	MargaryanWillerslevNature2020
VK274_noUDG.SG	1000	Denmark	Denmark_VikingSG	54.85	Langeland, Kaagarden	10.78	aadr	MargaryanWillerslevNature2020
VK278_noUDG.SG	1000	Denmark	Denmark_VikingSG	55.5	Funen, Galgedil	10.33	aadr	MargaryanWillerslevNature2020
VK279_noUDG.SG	1000	Denmark	Denmark_VikingSG	55.5	Funen, Galgedil	10.33	aadr	MargaryanWillerslevNature2020
VK281_noUDG.SG	1000	Denmark	Denmark_VikingSG	55.13	Sealand, Borse	11.95	aadr	MargaryanWillerslevNature2020
VK284_noUDG.SG	1000	Denmark	Denmark_VikingSG	55.65	Sealand, Trekroner-Grydehej	12.14	aadr	MargaryanWillerslevNature2020
VK285_noUDG.SG	1000	Denmark	Denmark_VikingSG	54.85	Langeland, Kaagarden	10.78	aadr	MargaryanWillerslevNature2020
VK286_noUDG.SG	1000	Denmark	Denmark_VikingSG	54.87	Langeland, Bogevej	10.72	aadr	MargaryanWillerslevNature2020
VK288_noUDG.SG	1000	Denmark	Denmark_VikingSG	54.87	Langeland, Bogevej	10.72	aadr	MargaryanWillerslevNature2020
VK289_noUDG.SG	1100	Denmark	Denmark_VikingSG	54.8	Langeland, Bodkergarden	10.69	aadr	MargaryanWillerslevNature2020
VK290_noUDG.SG	1000	Denmark	Denmark_VikingSG	54.89	Langeland, Kumle hoje	10.74	aadr	MargaryanWillerslevNature2020
VK291_noUDG.SG	1100	Denmark	Denmark_VikingSG	54.8	Langeland, Bodkergarden	10.69	aadr	MargaryanWillerslevNature2020
VK294_noUDG.SG	1075	Denmark	Denmark_VikingSG	55.56	Sealand, Bakkendrup	11.25	aadr	MargaryanWillerslevNature2020
VK295_noUDG.SG	1000	Denmark	Denmark_VikingSG	55.51	Funen, Hessum	10.45	aadr	MargaryanWillerslevNature2020
VK301_noUDG.SG	1185	Denmark	Denmark_VikingSG	55.43	Funen, Ladby	10.61	aadr	MargaryanWillerslevNature2020
VK315_noUDG.SG	1075	Denmark	Denmark_VikingSG	55.56	Sealand, Bakkendrup	11.25	aadr	MargaryanWillerslevNature2020
VK316_noUDG.SG	1000	Denmark	Denmark_VikingSG	55.51	Funen, Hessum	10.45	aadr	MargaryanWillerslevNature2020
VK320_noUDG.SG	1000	Denmark	Denmark_VikingSG	54.87	Langeland, Bogevej	10.72	aadr	MargaryanWillerslevNature2020
VK322_noUDG.SG	934	Denmark	Denmark_VikingSG	55.33	Jutland, Ribe	8.76	aadr	MargaryanWillerslevNature2020
VK323_noUDG.SG	1000	Denmark	Denmark_VikingSG	55.33	Jutland, Ribe	8.76	aadr	MargaryanWillerslevNature2020
VK324_noUDG.SG	935	Denmark	Denmark_VikingSG	55.33	Jutland, Ribe	8.76	aadr	MargaryanWillerslevNature2020
VK325_noUDG.SG	1145	Denmark	Denmark_VikingSG	55.33	Jutland, Ribe	8.76	aadr	MargaryanWillerslevNature2020
VK326_noUDG.SG	1026	Denmark	Denmark_VikingSG	55.33	Jutland, Ribe	8.76	aadr	MargaryanWillerslevNature2020
VK327_noUDG.SG	979	Denmark	Denmark_VikingSG	55.33	Jutland, Ribe	8.76	aadr	MargaryanWillerslevNature2020
VK328_noUDG.SG	1104	Denmark	Denmark_VikingSG	55.33	Jutland, Ribe	8.76	aadr	MargaryanWillerslevNature2020
VK329_noUDG.SG	1183	Denmark	Denmark_VikingSG	55.33	Jutland, Ribe	8.76	aadr	MargaryanWillerslevNature2020
VK330_noUDG.SG	896	Denmark	Denmark_VikingSG	55.33	Jutland, Ribe	8.76	aadr	MargaryanWillerslevNature2020
VK338_noUDG.SG	1000	Denmark	Denmark_VikingSG	54.87	Langeland, Bogevej	10.72	aadr	MargaryanWillerslevNature2020
VK340_noUDG.SG	1075	Denmark	Denmark_VikingSG	55.95	Jutland, Hesselbjerg	10.2	aadr	MargaryanWillerslevNature2020
VK361_noUDG.SG	1000	Denmark	Denmark_VikingSG	54.87	Langeland, Bogevej	10.72	aadr	MargaryanWillerslevNature2020
VK362_noUDG.SG	1000	Denmark	Denmark_VikingSG	54.87	Langeland, Bogevej	10.72	aadr	MargaryanWillerslevNature2020
VK363_noUDG.SG	1000	Denmark	Denmark_VikingSG	54.87	Langeland, Bogevej	10.72	aadr	MargaryanWillerslevNature2020
VK364_noUDG.SG	1000	Denmark	Denmark_VikingSG	54.87	Langeland, Bogevej	10.72	aadr	MargaryanWillerslevNature2020
VK365_noUDG.SG	1000	Denmark	Denmark_VikingSG	54.87	Langeland, Bogevej	10.72	aadr	MargaryanWillerslevNature2020
VK366_noUDG.SG	1000	Denmark	Denmark_VikingSG	54.87	Langeland, Bogevej	10.72	aadr	MargaryanWillerslevNature2020
VK367_noUDG.SG	1000	Denmark	Denmark_VikingSG	54.87	Langeland, Bogevej	10.72	aadr	MargaryanWillerslevNature2020
VK368_noUDG.SG	1000	Denmark	Denmark_VikingSG	54.87	Langeland, Bogevej	10.72	aadr	MargaryanWillerslevNature2020
VK369_noUDG.SG	1075	Denmark	Denmark_VikingSG	55.56	Sealand, Bakkendrup	11.25	aadr	MargaryanWillerslevNature2020
VK370_noUDG.SG	1000	Denmark	Denmark_VikingSG	55.5	Funen, Galgedil	10.33	aadr	MargaryanWillerslevNature2020
VK371_noUDG.SG	1065	Denmark	Denmark_VikingSG	55.5	Funen, Galgedil	10.33	aadr	MargaryanWillerslevNature2020
VK372_noUDG.SG	1000	Denmark	Denmark_VikingSG	55.5	Funen, Galgedil	10.33	aadr	MargaryanWillerslevNature2020
VK373_noUDG.SG	1000	Denmark	Denmark_VikingSG	55.5	Funen, Galgedil	10.33	aadr	MargaryanWillerslevNature2020
VK384_noUDG.SG	1075	Denmark	Denmark_VikingSG	55.95	Jutland, Hesselbjerg	10.2	aadr	MargaryanWillerslevNature2020
VK385_noUDG.SG	1075	Denmark	Denmark_VikingSG	55.6	Sealand, Lejre	11.95	aadr	MargaryanWillerslevNature2020
VK445_noUDG.SG	1000	Denmark	Denmark_VikingSG	55.62	Sealand, Gl. Lejre	11.97	aadr	MargaryanWillerslevNature2020
VK446_noUDG.SG	1000	Denmark	Denmark_VikingSG	55.5	Funen, Galgedil	10.33	aadr	MargaryanWillerslevNature2020
VK84_noUDG.SG	1075	Denmark	Denmark_VikingSG	55.95	Jutland, Hesselbjerg	10.2	aadr	MargaryanWillerslevNature2020
VK87_noUDG.SG	1075	Denmark	Denmark_VikingSG	55.95	Jutland, Hesselbjerg	10.2	aadr	MargaryanWillerslevNature2020
KPN001.A_noUDG	900	Denmark	Denmark_Zealand_Saxon_Medieval	55.675268	Zealand, Kopenhagen	12.568294	aadr	GretzingerNature2022
KPN002.A_noUDG	900	Denmark	Denmark_Zealand_Saxon_Medieval	55.675268	Zealand, Kopenhagen	12.568294	aadr	GretzingerNature2022
KPN003.A_noUDG	900	Denmark	Denmark_Zealand_Saxon_Medieval	55.675268	Zealand, Kopenhagen	12.568294	aadr	GretzingerNature2022
KPN004.A_noUDG	900	Denmark	Denmark_Zealand_Saxon_Medieval	55.675268	Zealand, Kopenhagen	12.568294	aadr	GretzingerNature2022
KPN005.A_noUDG	900	Denmark	Denmark_Zealand_Saxon_Medieval	55.675268	Zealand, Kopenhagen	12.568294	aadr	GretzingerNature2022
KPN006.A_noUDG	900	Denmark	Denmark_Zealand_Saxon_Medieval	55.675268	Zealand, Kopenhagen	12.568294	aadr	GretzingerNature2022
KPN007.A_noUDG	900	Denmark	Denmark_Zealand_Saxon_Medieval	55.675268	Zealand, Kopenhagen	12.568294	aadr	GretzingerNature2022
KPN008.A_noUDG	900	Denmark	Denmark_Zealand_Saxon_Medieval	55.675268	Zealand, Kopenhagen	12.568294	aadr	GretzingerNature2022
KPN009.A_noUDG	900	Denmark	Denmark_Zealand_Saxon_Medieval	55.675268	Zealand, Kopenhagen	12.568294	aadr	GretzingerNature2022
KPN011.A_noUDG	900	Denmark	Denmark_Zealand_Saxon_Medieval	55.675268	Zealand, Kopenhagen	12.568294	aadr	GretzingerNature2022
KPN012.A_noUDG	900	Denmark	Denmark_Zealand_Saxon_Medieval	55.675268	Zealand, Kopenhagen	12.568294	aadr	GretzingerNature2022
KPN013.A_noUDG	900	Denmark	Denmark_Zealand_Saxon_Medieval	55.675268	Zealand, Kopenhagen	12.568294	aadr	GretzingerNature2022
KPN014.A_noUDG	900	Denmark	Denmark_Zealand_Saxon_Medieval	55.675268	Zealand, Kopenhagen	12.568294	aadr	GretzingerNature2022
KPN015.A_noUDG	900	Denmark	Denmark_Zealand_Saxon_Medieval	55.675268	Zealand, Kopenhagen	12.568294	aadr	GretzingerNature2022
I1770	3950	United Kingdom	England_BellBeaker	54.201949	England, North Yorkshire, Staxton, Staxton Beacon	-0.434355	aadr	OlaldeNature2018
I2418	4237	United Kingdom	England_BellBeaker	51.168023	England, Wiltshire, Amesbury Down	-1.7725402	aadr	OlaldeNature2018
I2443	4091	United Kingdom	England_BellBeaker	51.7977	England, Oxfordshire, Yarnton	-1.313464	aadr	OlaldeNature2018
I2445	4048	United Kingdom	England_BellBeaker	51.7977	England, Oxfordshire, Yarnton	-1.313464	aadr	OlaldeNature2018
I2447	3938	United Kingdom	England_BellBeaker	51.7977	England, Oxfordshire, Yarnton	-1.313464	aadr	OlaldeNature2018
I2450	4248	United Kingdom	England_BellBeaker	51.68	England, Oxfordshire, Abington, Spring Road cemetery	-1.297	aadr	OlaldeNature2018
I2452	4052	United Kingdom	England_BellBeaker	52.854	England, South Derbyshire, Willington, Dairy Farm	-1.565	aadr	OlaldeNature2018
I2453	4122	United Kingdom	England_BellBeaker	52.67	England, Lincolnshire, West Deeping	-0.35	aadr	OlaldeNature2018
I3255	3994	United Kingdom	England_BellBeaker	52.170279	England, Cambridgeshire, Trumpington Meadows	0.105604	aadr	OlaldeNature2018
I3256	4063	United Kingdom	England_BellBeaker	52.170279	England, Cambridgeshire, Trumpington Meadows	0.105604	aadr	OlaldeNature2018
I4950	4250	United Kingdom	England_BellBeaker	51.289876	England, Wiltshire, Upavon, RFC Central Flying School	-1.807234	aadr	OlaldeNature2018
I5512	4250	United Kingdom	England_BellBeaker	51.24	England, Wiltshire, Netheravon, Flying School	-1.76	aadr	OlaldeNature2018
I5513	4250	United Kingdom	England_BellBeaker	51.22	England, North Ablington, Figheldean	-1.77	aadr	OlaldeNature2018
I6775	4150	United Kingdom	England_BellBeaker	51.121284	England, Somerset, Stogursey, Wick Barrow	-3.075648	aadr	OlaldeNature2018
I1767	4045	United Kingdom	England_BellBeaker_highEEF	54.522812	England, County Durham, Stockton-on-Tees, Windmill Fields	-1.308134	aadr	OlaldeNature2018
I5379	4333	United Kingdom	England_BellBeaker_highEEF	50.919204	England, Dorset, Sixpenny Handley, Canada Farm	-2.015441	aadr	OlaldeNature2018
I2417	4250	United Kingdom	England_BellBeaker_lowEEF	51.168023	England, Wiltshire, Amesbury Down	-1.7725402	aadr	OlaldeNature2018
I2454	4042	United Kingdom	England_BellBeaker_lowEEF	52.34	England, Needingworth Quarry, Over Narrows	0.03	aadr	OlaldeNature2018
I2459	4231	United Kingdom	England_BellBeaker_lowEEF	51.168023	England, Wiltshire, Amesbury Down	-1.7725402	aadr	OlaldeNature2018
I6774	4121	United Kingdom	England_BellBeaker_lowEEF	50.862516	England, Sussex, Brighton, Ditchling Road	-0.121506	aadr	OlaldeNature2018
I6680	3671	United Kingdom	England_BellBeaker_mediumEEF	55.309983	England, Northumberland, Low Hauxley	-1.553328	aadr	OlaldeNature2018
I6778	4150	United Kingdom	England_BellBeaker_o	51.147052	England, Wiltshire, Wilsford	-1.812529	aadr	OlaldeNature2018
I12786	4137	United Kingdom	England_C_EBA	51.697969	England, Gloucestershire, Lechlade-on-Thames, Lechlade Memorial Hall/Skate Park	-1.692092	aadr	PattersonNature2021
I14543	3975	United Kingdom	England_C_EBA	50.851087	England, Sussex, Brighton, Ditchling Road	-0.134783	aadr	PattersonNature2021
I14553	3807	United Kingdom	England_C_EBA	50.815565	England, Sussex, Brighton, Roedean Crescent	-0.091565	aadr	PattersonNature2021
I16400	3900	United Kingdom	England_C_EBA	54.082717	England, North Yorkshire, Grassington, 3 Barrow Sites	-1.996908	aadr	PattersonNature2021
I16424	4106	United Kingdom	England_C_EBA	50.539905	England, Cornwall, Padstow, St. Merryn, Harlyn Bay	-4.997809	aadr	PattersonNature2021
I18606	3770	United Kingdom	England_C_EBA	54.09805556	England, East Riding of Yorkshire, Thornholme, East Coast Pipeline (field 10)	-0.282161111	aadr	PattersonNature2021
I20997	4075	United Kingdom	England_C_EBA	54.162749	England, Cumbria, Ulverston, Birkrigg Common	-3.108988	aadr	PattersonNature2021
I2421	3790	United Kingdom	England_C_EBA	54.883	England, Tyne and Wear, Sunderland, Hasting Hill	-1.452	aadr	OlaldeNature2018
I2457	4056	United Kingdom	England_C_EBA	51.168023	England, Wiltshire, Amesbury Down	-1.7725402	aadr	OlaldeNature2018
I2461	3975	United Kingdom	England_C_EBA	51.13	England, Wiltshire, Porton	-1.69	aadr	OlaldeNature2018
I2566	4078	United Kingdom	England_C_EBA	51.168023	England, Wiltshire, Amesbury Down	-1.7725402	aadr	OlaldeNature2018
I2597	4080	United Kingdom	England_C_EBA	51.168023	England, Wiltshire, Amesbury Down	-1.7725402	aadr	OlaldeNature2018
I2601	3808	United Kingdom	England_C_EBA	51.3603	England, Kent, East Kent Access Road	1.3405	aadr	OlaldeNature2018
I2602	3762	United Kingdom	England_C_EBA	51.3603	England, Kent, East Kent Access Road	1.3405	aadr	OlaldeNature2018
I2604	4073	United Kingdom	England_C_EBA	51.15	England, Hampshire, Barton-Stacey Pipeline	-1.36	aadr	OlaldeNature2018
I2618	3993	United Kingdom	England_C_EBA	55.058	England, Northumberland, Barrasford, Reaverhill	-2.147	aadr	OlaldeNature2018
I5377	3758	United Kingdom	England_C_EBA	51.471197	England, London, Mortlake, River Thames Skulls	-0.266408	aadr	OlaldeNature2018
I6777	4050	United Kingdom	England_C_EBA	51.147052	England, Wiltshire, Wilsford	-1.812529	aadr	OlaldeNature2018
I7570	3569	United Kingdom	England_C_EBA	52.696301	England, Lincolnshire, Langtoft	-0.34	aadr	OlaldeNature2018
I7573	3520	United Kingdom	England_C_EBA	52.310608	England, Cambridgeshire, Fordham	0.386227	aadr	OlaldeNature2018
I7635	4030	United Kingdom	England_C_EBA	54.522812	England, County Durham, Stockton-on-Tees, Windmill Fields	-1.308134	aadr	OlaldeNature2018
I7638	3995	United Kingdom	England_C_EBA	51.405327	England, Oxfordshire, Radley, Barrow Hills	-1.150767	aadr	OlaldeNature2018
I2600	3970	United Kingdom	England_C_EBA_daughterI2457	51.13	England, Wiltshire, Porton	-1.69	aadr	OlaldeNature2018
I12776	3778	United Kingdom	England_C_EBA_highEEF	53.079803	England, Derbyshire, Brassington, Carsington Pasture Cave	-1.640942	aadr	PattersonNature2021
I2462	3942	United Kingdom	England_C_EBA_highEEF	51.3603	England, Kent, East Kent Access Road	1.3405	aadr	OlaldeNature2018
I2596	4086	United Kingdom	England_C_EBA_lowEEF_fatherorsonI2597	51.168023	England, Wiltshire, Amesbury Down	-1.7725402	aadr	OlaldeNature2018
I14534	1350	United Kingdom	England_EarlyMedieval	50.789115	England, Sussex, Bishopstone, Rookery Hill	0.082351	aadr	GretzingerNature2022
I14536	1350	United Kingdom	England_EarlyMedieval	50.789115	England, Sussex, Bishopstone, Rookery Hill	0.082351	aadr	GretzingerNature2022
I14538	1350	United Kingdom	England_EarlyMedieval	50.789115	England, Sussex, Bishopstone, Rookery Hill	0.082351	aadr	GretzingerNature2022
I14541	1350	United Kingdom	England_EarlyMedieval	50.789115	England, Sussex, Bishopstone, Rookery Hill	0.082351	aadr	GretzingerNature2022
I14542	1350	United Kingdom	England_EarlyMedieval	50.789115	England, Sussex, Bishopstone, Rookery Hill	0.082351	aadr	GretzingerNature2022
I16508	1276	United Kingdom	England_EarlyMedieval	52.062352	England, Buckinghamshire, Wolverton	-0.81617	aadr	GretzingerNature2022
I16509	1311	United Kingdom	England_EarlyMedieval	52.062352	England, Buckinghamshire, Wolverton	-0.81617	aadr	GretzingerNature2022
I16510	1324	United Kingdom	England_EarlyMedieval	52.062352	England, Buckinghamshire, Wolverton	-0.81617	aadr	GretzingerNature2022
I17269	1200	United Kingdom	England_EarlyMedieval	54.594544	England, North Yorkshire, Stockton-on-Tees, Norton, Norton Bishops Mill	-1.309398	aadr	GretzingerNature2022
I17270	1200	United Kingdom	England_EarlyMedieval	54.594544	England, North Yorkshire, Stockton-on-Tees, Norton, Norton Bishops Mill	-1.309398	aadr	GretzingerNature2022
I17271	1200	United Kingdom	England_EarlyMedieval	54.594544	England, North Yorkshire, Stockton-on-Tees, Norton, Norton Bishops Mill	-1.309398	aadr	GretzingerNature2022
I17272	1400	United Kingdom	England_EarlyMedieval	54.594544	England, North Yorkshire, Stockton-on-Tees, Norton, Norton East Mill	-1.309398	aadr	GretzingerNature2022
I17273	1400	United Kingdom	England_EarlyMedieval	54.594544	England, North Yorkshire, Stockton-on-Tees, Norton, Norton East Mill	-1.309398	aadr	GretzingerNature2022
I17274	1400	United Kingdom	England_EarlyMedieval	54.594544	England, North Yorkshire, Stockton-on-Tees, Norton, Norton East Mill	-1.309398	aadr	GretzingerNature2022
I17275	1400	United Kingdom	England_EarlyMedieval	54.594544	England, North Yorkshire, Stockton-on-Tees, Norton, Norton East Mill	-1.309398	aadr	GretzingerNature2022
I17276	1400	United Kingdom	England_EarlyMedieval	54.594544	England, North Yorkshire, Stockton-on-Tees, Norton, Norton East Mill	-1.309398	aadr	GretzingerNature2022
I17277	1200	United Kingdom	England_EarlyMedieval	54.697647	England, Durham, Hartlepool, Olive Street	-1.181035	aadr	GretzingerNature2022
I20637	1350	United Kingdom	England_EarlyMedieval	50.60009092	England, Dorset, Worth Matravers	-2.036950526	aadr	GretzingerNature2022
I14535	1350	United Kingdom	England_EarlyMedieval_fatherI14536	50.789115	England, Sussex, Bishopstone, Rookery Hill	0.082351	aadr	GretzingerNature2022
I14539	1350	United Kingdom	England_EarlyMedieval_o	50.789115	England, Sussex, Bishopstone, Rookery Hill	0.082351	aadr	GretzingerNature2022
I11583	1450	United Kingdom	England_EarlyMedieval_Saxon	54.170989	England, North Yorkshire, Vale of Pickering, West Heslerton	-0.605739	aadr	GretzingerNature2022
I11584	1450	United Kingdom	England_EarlyMedieval_Saxon	54.170989	England, North Yorkshire, Vale of Pickering, West Heslerton	-0.605739	aadr	GretzingerNature2022
I11585	1450	United Kingdom	England_EarlyMedieval_Saxon	54.170989	England, North Yorkshire, Vale of Pickering, West Heslerton	-0.605739	aadr	GretzingerNature2022
I11586	1450	United Kingdom	England_EarlyMedieval_Saxon	54.170989	England, North Yorkshire, Vale of Pickering, West Heslerton	-0.605739	aadr	GretzingerNature2022
I11587	1450	United Kingdom	England_EarlyMedieval_Saxon	54.170989	England, North Yorkshire, Vale of Pickering, West Heslerton	-0.605739	aadr	GretzingerNature2022
I11589	1450	United Kingdom	England_EarlyMedieval_Saxon	54.170989	England, North Yorkshire, Vale of Pickering, West Heslerton	-0.605739	aadr	GretzingerNature2022
I11590	1450	United Kingdom	England_EarlyMedieval_Saxon	54.170989	England, North Yorkshire, Vale of Pickering, West Heslerton	-0.605739	aadr	GretzingerNature2022
I20639	1450	United Kingdom	England_EarlyMedieval_Saxon	54.170989	England, North Yorkshire, Vale of Pickering, West Heslerton	-0.605739	aadr	GretzingerNature2022
I20640	1450	United Kingdom	England_EarlyMedieval_Saxon	54.170989	England, North Yorkshire, Vale of Pickering, West Heslerton	-0.605739	aadr	GretzingerNature2022
I20641	1450	United Kingdom	England_EarlyMedieval_Saxon	54.170989	England, North Yorkshire, Vale of Pickering, West Heslerton	-0.605739	aadr	GretzingerNature2022
I20644	1450	United Kingdom	England_EarlyMedieval_Saxon	54.170989	England, North Yorkshire, Vale of Pickering, West Heslerton	-0.605739	aadr	GretzingerNature2022
I20646	1450	United Kingdom	England_EarlyMedieval_Saxon	54.170989	England, North Yorkshire, Vale of Pickering, West Heslerton	-0.605739	aadr	GretzingerNature2022
I20649	1450	United Kingdom	England_EarlyMedieval_Saxon	54.170989	England, North Yorkshire, Vale of Pickering, West Heslerton	-0.605739	aadr	GretzingerNature2022
I20650	1450	United Kingdom	England_EarlyMedieval_Saxon	54.170989	England, North Yorkshire, Vale of Pickering, West Heslerton	-0.605739	aadr	GretzingerNature2022
I20652	1450	United Kingdom	England_EarlyMedieval_Saxon	54.170989	England, North Yorkshire, Vale of Pickering, West Heslerton	-0.605739	aadr	GretzingerNature2022
I20653	1450	United Kingdom	England_EarlyMedieval_Saxon	54.170989	England, North Yorkshire, Vale of Pickering, West Heslerton	-0.605739	aadr	GretzingerNature2022
I20654	1450	United Kingdom	England_EarlyMedieval_Saxon	54.170989	England, North Yorkshire, Vale of Pickering, West Heslerton	-0.605739	aadr	GretzingerNature2022
I20655	1450	United Kingdom	England_EarlyMedieval_Saxon	54.170989	England, North Yorkshire, Vale of Pickering, West Heslerton	-0.605739	aadr	GretzingerNature2022
I20658	1450	United Kingdom	England_EarlyMedieval_Saxon	54.170989	England, North Yorkshire, Vale of Pickering, West Heslerton	-0.605739	aadr	GretzingerNature2022
I20659	1450	United Kingdom	England_EarlyMedieval_Saxon	54.170989	England, North Yorkshire, Vale of Pickering, West Heslerton	-0.605739	aadr	GretzingerNature2022
I20660	1450	United Kingdom	England_EarlyMedieval_Saxon	54.170989	England, North Yorkshire, Vale of Pickering, West Heslerton	-0.605739	aadr	GretzingerNature2022
I20661	1450	United Kingdom	England_EarlyMedieval_Saxon	54.170989	England, North Yorkshire, Vale of Pickering, West Heslerton	-0.605739	aadr	GretzingerNature2022
I20668	1450	United Kingdom	England_EarlyMedieval_Saxon	54.170989	England, North Yorkshire, Vale of Pickering, West Heslerton	-0.605739	aadr	GretzingerNature2022
I20670	1450	United Kingdom	England_EarlyMedieval_Saxon	54.170989	England, North Yorkshire, Vale of Pickering, West Heslerton	-0.605739	aadr	GretzingerNature2022
I20671	1450	United Kingdom	England_EarlyMedieval_Saxon	54.170989	England, North Yorkshire, Vale of Pickering, West Heslerton	-0.605739	aadr	GretzingerNature2022
I20673	1450	United Kingdom	England_EarlyMedieval_Saxon	54.170989	England, North Yorkshire, Vale of Pickering, West Heslerton	-0.605739	aadr	GretzingerNature2022
I20674	1450	United Kingdom	England_EarlyMedieval_Saxon	54.170989	England, North Yorkshire, Vale of Pickering, West Heslerton	-0.605739	aadr	GretzingerNature2022
I20677	1450	United Kingdom	England_EarlyMedieval_Saxon	54.170989	England, North Yorkshire, Vale of Pickering, West Heslerton	-0.605739	aadr	GretzingerNature2022
I20678	1450	United Kingdom	England_EarlyMedieval_Saxon	54.170989	England, North Yorkshire, Vale of Pickering, West Heslerton	-0.605739	aadr	GretzingerNature2022
I20679	1450	United Kingdom	England_EarlyMedieval_Saxon	54.170989	England, North Yorkshire, Vale of Pickering, West Heslerton	-0.605739	aadr	GretzingerNature2022
I20680	1450	United Kingdom	England_EarlyMedieval_Saxon	54.170989	England, North Yorkshire, Vale of Pickering, West Heslerton	-0.605739	aadr	GretzingerNature2022
I0157	1227	United Kingdom	England_EarlyMedieval_Saxon	52.08	England, South Cambridgeshire, East Anglia, Hinxton	0.18	aadr	GretzingerNature2022 (new version of individual previously published in SchiffelsNatureCommunications2016)
I0159	1234	United Kingdom	England_EarlyMedieval_Saxon	52.08	England, South Cambridgeshire, East Anglia, Hinxton	0.18	aadr	GretzingerNature2022 (new version of individual previously published in SchiffelsNatureCommunications2016)
I0161	1157	United Kingdom	England_EarlyMedieval_Saxon	52.08	England, South Cambridgeshire, East Anglia, Hinxton	0.18	aadr	GretzingerNature2022 (new version of individual previously published in SchiffelsNatureCommunications2016)
I0769	1449	United Kingdom	England_EarlyMedieval_Saxon	52.26136	England, South Cambridgeshire, Oakington	0.06869	aadr	GretzingerNature2022 (new version of individual previously published in SchiffelsNatureCommunications2016)
I0773	1479	United Kingdom	England_EarlyMedieval_Saxon	52.26136	England, South Cambridgeshire, Oakington	0.06869	aadr	GretzingerNature2022 (new version of individual previously published in SchiffelsNatureCommunications2016)
I0774	1469	United Kingdom	England_EarlyMedieval_Saxon	52.26136	England, South Cambridgeshire, Oakington	0.06869	aadr	GretzingerNature2022 (new version of individual previously published in SchiffelsNatureCommunications2016)
I0777	1465	United Kingdom	England_EarlyMedieval_Saxon	52.26136	England, South Cambridgeshire, Oakington	0.06869	aadr	GretzingerNature2022 (new version of individual previously published in SchiffelsNatureCommunications2016)
I0791	1175	United Kingdom	England_EarlyMedieval_Saxon	52.0991	England, Cambridgeshire, Linton	0.277	aadr	GretzingerNature2022
I17268	1200	United Kingdom	England_EarlyMedieval_Saxon	54.594544	England, North Yorkshire, Stockton-on-Tees, Norton, Norton Bishops Mill	-1.309398	aadr	GretzingerNature2022 (new version of individual previously published in MartinianoNatureCommunications2016)
I3037	1263	United Kingdom	England_EarlyMedieval_Saxon	52.062352	England, Buckinghamshire, Wolverton	-0.81617	aadr	GretzingerNature2022
I3044	856	United Kingdom	England_EarlyMedieval_Saxon	53.234533	England, Lincolnshire, Lincoln, Lincoln Castle	-0.540804	aadr	GretzingerNature2022
I3056	1225	United Kingdom	England_EarlyMedieval_Saxon_contam	54.160599	England, North Yorkshire, Ribblesdale, Selside Grike	-2.328012	aadr	GretzingerNature2022 (red flag)
I20638	1450	United Kingdom	England_EarlyMedieval_Saxon_fatherorsonI20649fatherorsonI11588	54.170989	England, North Yorkshire, Vale of Pickering, West Heslerton	-0.605739	aadr	GretzingerNature2022
I3011	886	United Kingdom	England_EarlyMedieval_Saxon_o	53.234533	England, Lincolnshire, Lincoln, Lincoln Castle	-0.540804	aadr	GretzingerNature2022
I20656	1450	United Kingdom	England_EarlyMedieval_Saxon_oSteppe	54.170989	England, North Yorkshire, Vale of Pickering, West Heslerton	-0.605739	aadr	GretzingerNature2022
I0157.SG	1227	United Kingdom	England_EarlyMedieval_SaxonSG	52.08	England, South Cambridgeshire, East Anglia, Hinxton	0.18	aadr	SchiffelsNatureCommunications2016
I0159.SG	1234	United Kingdom	England_EarlyMedieval_SaxonSG	52.08	England, South Cambridgeshire, East Anglia, Hinxton	0.18	aadr	SchiffelsNatureCommunications2016
I0161.SG	1157	United Kingdom	England_EarlyMedieval_SaxonSG	52.08	England, South Cambridgeshire, East Anglia, Hinxton	0.18	aadr	SchiffelsNatureCommunications2016
I0769.SG	1449	United Kingdom	England_EarlyMedieval_SaxonSG	52.26136	England, South Cambridgeshire, Oakington	0.06869	aadr	SchiffelsNatureCommunications2016
I0773.SG	1479	United Kingdom	England_EarlyMedieval_SaxonSG	52.26136	England, South Cambridgeshire, Oakington	0.06869	aadr	SchiffelsNatureCommunications2016
I0774.SG	1469	United Kingdom	England_EarlyMedieval_SaxonSG	52.26136	England, South Cambridgeshire, Oakington	0.06869	aadr	SchiffelsNatureCommunications2016
I0777.SG	1465	United Kingdom	England_EarlyMedieval_SaxonSG	52.26136	England, South Cambridgeshire, Oakington	0.06869	aadr	SchiffelsNatureCommunications2016
NO3423_noUDG.SG	1200	United Kingdom	England_EarlyMedieval_SaxonSG	53.633	England, North Yorkshire, Stockton-on-Tees, Norton, Norton Bishops Mill	-1.175	aadr	MartinianoNatureCommunications2016
I11033	2421	United Kingdom	England_EastYorkshire_EIA	53.919396	England, East Riding of Yorkshire, Pocklington (Burnby Lane)	-0.766635	aadr	PattersonNature2021
I13758	2175	United Kingdom	England_EastYorkshire_MIA_LIA_brotherI21558	53.919396	England, East Riding of Yorkshire, Pocklington (Burnby Lane)	-0.766635	aadr	PattersonNature2021
I14107	2175	United Kingdom	England_EastYorkshire_MIA_LIA_sonI21698	53.919396	England, East Riding of Yorkshire, Pocklington (Burnby Lane)	-0.766635	aadr	PattersonNature2021
I14106	2045	United Kingdom	England_EastYorkshire_LIA	53.919396	England, East Riding of Yorkshire, Pocklington (Burnby Lane)	-0.766635	aadr	PattersonNature2021
I22057	1970	United Kingdom	England_EastYorkshire_LIA	54.12647222	England, East Riding of Yorkshire, Thornholme, East Coast Pipeline (field 16)	-0.287966667	aadr	PattersonNature2021
I22062	1930	United Kingdom	England_EastYorkshire_LIA	54.05587222	England, East Riding of Yorkshire, Thornholme, Town Pasture	-0.307591667	aadr	PattersonNature2021
I22064	1971	United Kingdom	England_EastYorkshire_LIA	54.12647222	England, East Riding of Yorkshire, Thornholme, East Coast Pipeline (field 16)	-0.287966667	aadr	PattersonNature2021
I5502	2054	United Kingdom	England_EastYorkshire_LIA	53.916717	England, East Riding of Yorkshire, Nunburnholme Wold	-0.666972	aadr	PattersonNature2021
I12412	2238	United Kingdom	England_EastYorkshire_MIA	53.919396	England, East Riding of Yorkshire, Pocklington (Burnby Lane)	-0.766635	aadr	PattersonNature2021
I14100	2302	United Kingdom	England_EastYorkshire_MIA	53.919396	England, East Riding of Yorkshire, Pocklington (Burnby Lane)	-0.766635	aadr	PattersonNature2021
I22055	2237	United Kingdom	England_EastYorkshire_MIA	54.12647222	England, East Riding of Yorkshire, Thornholme, East Coast Pipeline (field 16)	-0.287966667	aadr	PattersonNature2021
I22056	2238	United Kingdom	England_EastYorkshire_MIA	54.12647222	England, East Riding of Yorkshire, Thornholme, East Coast Pipeline (field 16)	-0.287966667	aadr	PattersonNature2021
I11034	2175	United Kingdom	England_EastYorkshire_MIA_LIA	53.919396	England, East Riding of Yorkshire, Pocklington (Burnby Lane)	-0.766635	aadr	PattersonNature2021
I12411	2175	United Kingdom	England_EastYorkshire_MIA_LIA	53.919396	England, East Riding of Yorkshire, Pocklington (Burnby Lane)	-0.766635	aadr	PattersonNature2021
I12413	2175	United Kingdom	England_EastYorkshire_MIA_LIA	53.919396	England, East Riding of Yorkshire, Pocklington (Burnby Lane)	-0.766635	aadr	PattersonNature2021
I12414	2175	United Kingdom	England_EastYorkshire_MIA_LIA	53.919396	England, East Riding of Yorkshire, Pocklington (Burnby Lane)	-0.766635	aadr	PattersonNature2021
I12415	2175	United Kingdom	England_EastYorkshire_MIA_LIA	53.919396	England, East Riding of Yorkshire, Pocklington (Burnby Lane)	-0.766635	aadr	PattersonNature2021
I13751	2175	United Kingdom	England_EastYorkshire_MIA_LIA	53.919396	England, East Riding of Yorkshire, Pocklington (Burnby Lane)	-0.766635	aadr	PattersonNature2021
I13753	2175	United Kingdom	England_EastYorkshire_MIA_LIA	53.919396	England, East Riding of Yorkshire, Pocklington (Burnby Lane)	-0.766635	aadr	PattersonNature2021
I13754	2175	United Kingdom	England_EastYorkshire_MIA_LIA	53.919396	England, East Riding of Yorkshire, Pocklington (Burnby Lane)	-0.766635	aadr	PattersonNature2021
I13755	2175	United Kingdom	England_EastYorkshire_MIA_LIA	53.919396	England, East Riding of Yorkshire, Pocklington (Burnby Lane)	-0.766635	aadr	PattersonNature2021
I13756	2175	United Kingdom	England_EastYorkshire_MIA_LIA	53.919396	England, East Riding of Yorkshire, Pocklington (Burnby Lane)	-0.766635	aadr	PattersonNature2021
I13757	2175	United Kingdom	England_EastYorkshire_MIA_LIA	53.919396	England, East Riding of Yorkshire, Pocklington (Burnby Lane)	-0.766635	aadr	PattersonNature2021
I13759	2175	United Kingdom	England_EastYorkshire_MIA_LIA	53.919396	England, East Riding of Yorkshire, Pocklington (Burnby Lane)	-0.766635	aadr	PattersonNature2021
I13760	2175	United Kingdom	England_EastYorkshire_MIA_LIA	53.919396	England, East Riding of Yorkshire, Pocklington (Burnby Lane)	-0.766635	aadr	PattersonNature2021
I14099	2175	United Kingdom	England_EastYorkshire_MIA_LIA	53.919396	England, East Riding of Yorkshire, Pocklington (Burnby Lane)	-0.766635	aadr	PattersonNature2021
I14101	2175	United Kingdom	England_EastYorkshire_MIA_LIA	53.919396	England, East Riding of Yorkshire, Pocklington (Burnby Lane)	-0.766635	aadr	PattersonNature2021
I14102	2175	United Kingdom	England_EastYorkshire_MIA_LIA	53.919396	England, East Riding of Yorkshire, Pocklington (Burnby Lane)	-0.766635	aadr	PattersonNature2021
I14103	2175	United Kingdom	England_EastYorkshire_MIA_LIA	53.919396	England, East Riding of Yorkshire, Pocklington (Burnby Lane)	-0.766635	aadr	PattersonNature2021
I14104	2175	United Kingdom	England_EastYorkshire_MIA_LIA	53.919396	England, East Riding of Yorkshire, Pocklington (Burnby Lane)	-0.766635	aadr	PattersonNature2021
I14105	2175	United Kingdom	England_EastYorkshire_MIA_LIA	53.919396	England, East Riding of Yorkshire, Pocklington (Burnby Lane)	-0.766635	aadr	PattersonNature2021
I14108	2175	United Kingdom	England_EastYorkshire_MIA_LIA	53.919396	England, East Riding of Yorkshire, Pocklington (Burnby Lane)	-0.766635	aadr	PattersonNature2021
I14327	2081	United Kingdom	England_EastYorkshire_MIA_LIA	54.12647222	England, East Riding of Yorkshire, Thornholme, East Coast Pipeline (field 16)	-0.287966667	aadr	PattersonNature2021
I22052	2104	United Kingdom	England_EastYorkshire_MIA_LIA	54.12647222	England, East Riding of Yorkshire, East Coast Pipeline (field 16)	-0.287966667	aadr	PattersonNature2021
I22060	2074	United Kingdom	England_EastYorkshire_MIA_LIA	54.09468889	England, East Riding of Yorkshire, East Coast Pipeline (field 9)	-0.281613889	aadr	PattersonNature2021
I22065	2149	United Kingdom	England_EastYorkshire_MIA_LIA	53.734309	England, East Riding of Yorkshire, Burstwick	-0.141121	aadr	PattersonNature2021
I5503	2065	United Kingdom	England_EastYorkshire_MIA_LIA	53.916717	England, East Riding of Yorkshire, Nunburnholme Wold	-0.666972	aadr	PattersonNature2021
I5505	2175	United Kingdom	England_EastYorkshire_MIA_LIA	53.919396	England, East Riding of Yorkshire, Pocklington (Burnby Lane)	-0.766635	aadr	PattersonNature2021
I5506	2202	United Kingdom	England_EastYorkshire_MIA_LIA	53.919396	England, East Riding of Yorkshire, Pocklington (Burnby Lane)	-0.766635	aadr	PattersonNature2021
I5508	2175	United Kingdom	England_EastYorkshire_MIA_LIA	53.919396	England, East Riding of Yorkshire, Pocklington (Burnby Lane)	-0.766635	aadr	PattersonNature2021
I13752	2121	United Kingdom	England_EastYorkshire_MIA_LIA_sisterI5511	53.919396	England, East Riding of Yorkshire, Pocklington (Burnby Lane)	-0.766635	aadr	PattersonNature2021
I27380	4228	United Kingdom	England_EBA_BellBeaker	50.872397	England, Sussex, Westbourne, 'Racton Man'	-0.89596028	aadr	PattersonNature2021
I12935	4000	United Kingdom	England_EBA_highEEF	51.697969	England, Gloucestershire, Lechlade-on-Thames, Lechlade Memorial Hall/Skate Park	-1.692092	aadr	PattersonNature2021
I21306	2147	United Kingdom	England_LIA	51.444607	England, Somerset, Tickenham, Diamond Cottage	-2.814359	aadr	PattersonNature2021
I11149	2443	United Kingdom	England_EIA	52.198919	England, Cambridgeshire, Teversham (Marshall's) Evaluation	0.180799	aadr	PattersonNature2021
I11154	2469	United Kingdom	England_EIA	52.170279	England, Cambridgeshire, Trumpington Meadows	0.105604	aadr	PattersonNature2021
I11995	2457	United Kingdom	England_EIA	51.0128	England, Somerset, South Cadbury, Cadbury Castle	-2.3152	aadr	PattersonNature2021
I12783	2599	United Kingdom	England_EIA	51.697969	England, Gloucestershire, Lechlade-on-Thames, Lechlade Memorial Hall/Skate Park	-1.692092	aadr	PattersonNature2021
I12787	2391	United Kingdom	England_EIA	51.697969	England, Gloucestershire, Lechlade-on-Thames, Lechlade Memorial Hall/Skate Park	-1.692092	aadr	PattersonNature2021
I13682	2612	United Kingdom	England_EIA	51.264052	England, Somerset, Mells Down, Kingsdown Camp	-2.405024	aadr	PattersonNature2021
I13684	2408	United Kingdom	England_EIA	51.176318	England, Somerset, Meare Lake Village West	-2.796919	aadr	PattersonNature2021
I13688	2589	United Kingdom	England_EIA	51.052725	England, Wiltshire, Rowbarrow	-1.7862875	aadr	PattersonNature2021
I13689	2531	United Kingdom	England_EIA	51.052725	England, Wiltshire, Rowbarrow	-1.7862875	aadr	PattersonNature2021
I14381	2443	United Kingdom	England_EIA	51.329195	England, Kent, Cliffs End Farm	1.3693088	aadr	PattersonNature2021
I16618	2604	United Kingdom	England_EIA	50.850879	England, Sussex, Brighton, Surrendon Road	-0.14475	aadr	PattersonNature2021
I17258	2415	United Kingdom	England_EIA	51.136489	England, Hampshire, Stockbridge, New Buildings	-1.494026	aadr	PattersonNature2021
I17259	2438	United Kingdom	England_EIA	51.136489	England, Hampshire, Stockbridge, New Buildings	-1.494026	aadr	PattersonNature2021
I17260	2550	United Kingdom	England_EIA	51.136489	England, Hampshire, Stockbridge, New Buildings	-1.494026	aadr	PattersonNature2021
I19287	2570	United Kingdom	England_EIA	51.168023	England, Wiltshire, Amesbury Down	-1.7725402	aadr	PattersonNature2021
I19861	2597	United Kingdom	England_EIA	51.052725	England, Wiltshire, Rowbarrow	-1.7862875	aadr	PattersonNature2021
I19862	2571	United Kingdom	England_EIA	51.052725	England, Wiltshire, Rowbarrow	-1.7862875	aadr	PattersonNature2021
I19863	2352	United Kingdom	England_EIA	51.052725	England, Wiltshire, Rowbarrow	-1.7862875	aadr	PattersonNature2021
I19868	2579	United Kingdom	England_EIA	51.052725	England, Wiltshire, Rowbarrow	-1.7862875	aadr	PattersonNature2021
I20585	2550	United Kingdom	England_EIA	51.7977	England, Oxfordshire, Yarnton	-1.313464	aadr	PattersonNature2021
I27381	2487	United Kingdom	England_EIA	50.710999	England, Dorset, Long Bredy, Bottle Knap	-2.611068	aadr	PattersonNature2021
I27382	2592	United Kingdom	England_EIA	50.710999	England, Dorset, Long Bredy, Bottle Knap	-2.611068	aadr	PattersonNature2021
I27383	2522	United Kingdom	England_EIA	50.710999	England, Dorset, Long Bredy, Bottle Knap	-2.611068	aadr	PattersonNature2021
I12774	2554	United Kingdom	England_EIA_highEEF	53.079803	England, Derbyshire, Brassington, Carsington Pasture Cave	-1.640942	aadr	PattersonNature2021
I19867	2598	United Kingdom	England_EIA_highEEF	51.052725	England, Wiltshire, Rowbarrow	-1.7862875	aadr	PattersonNature2021
I30300	5575	United Kingdom	England_N_Megalithic	51.861211	England, Gloucestershire, Cheltenham, Hazleton North	-1.883011	aadr	FowlerOlaldeNature2021
I12772	2329	United Kingdom	England_IA	50.539905	England, Cornwall, Padstow, St. Merryn, Harlyn Bay	-4.997809	aadr	PattersonNature2021
I16380	2329	United Kingdom	England_IA	50.539905	England, Cornwall, Padstow, St. Merryn, Harlyn Bay	-4.997809	aadr	PattersonNature2021
I16388	2329	United Kingdom	England_IA	50.539905	England, Cornwall, Padstow, St. Merryn, Harlyn Bay	-4.997809	aadr	PattersonNature2021
I16439	2329	United Kingdom	England_IA	50.539905	England, Cornwall, Padstow, St. Merryn, Harlyn Bay	-4.997809	aadr	PattersonNature2021
I16440	2329	United Kingdom	England_IA	50.539905	England, Cornwall, Padstow, St. Merryn, Harlyn Bay	-4.997809	aadr	PattersonNature2021
I16441	2329	United Kingdom	England_IA	50.539905	England, Cornwall, Padstow, St. Merryn, Harlyn Bay	-4.997809	aadr	PattersonNature2021
I16442	2329	United Kingdom	England_IA	50.539905	England, Cornwall, Padstow, St. Merryn, Harlyn Bay	-4.997809	aadr	PattersonNature2021
I6769	2548	United Kingdom	England_IA	50.539905	England, Cornwall, Padstow, St. Merryn, Harlyn Bay	-4.997809	aadr	PattersonNature2021
I14550	1850	United Kingdom	England_IA_EarlyMedieval	50.844866	England, Sussex, Brighton, Slonk Hill	-0.266087	aadr	PattersonNature2021
I0156.SG	1981	United Kingdom	England_IA_ERomanSG	52.08	England, South Cambridgeshire, East Anglia, Hinxton	0.18	aadr	SchiffelsNatureCommunications2016
3DT26_noUDG.SG	1750	United Kingdom	England_IA_Roman_oMiddleEastSG	53.958333	England, Yorkshire, Driffield Terrace	-1.080278	aadr	MartinianoNatureCommunications2016
3DT16_noUDG.SG	1750	United Kingdom	England_IA_RomanSG	53.958333	England, Yorkshire, Driffield Terrace	-1.080278	aadr	MartinianoNatureCommunications2016
6DT18_noUDG.SG	1750	United Kingdom	England_IA_RomanSG	53.958333	England, Yorkshire, Driffield Terrace	-1.080278	aadr	MartinianoNatureCommunications2016
6DT21_noUDG.SG	1750	United Kingdom	England_IA_RomanSG	53.958333	England, Yorkshire, Driffield Terrace	-1.080278	aadr	MartinianoNatureCommunications2016
6DT22_noUDG.SG	1750	United Kingdom	England_IA_RomanSG	53.958333	England, Yorkshire, Driffield Terrace	-1.080278	aadr	MartinianoNatureCommunications2016
6DT23_noUDG.SG	1750	United Kingdom	England_IA_RomanSG	53.958333	England, Yorkshire, Driffield Terrace	-1.080278	aadr	MartinianoNatureCommunications2016
6DT3_noUDG.SG	1750	United Kingdom	England_IA_RomanSG	53.958333	England, Yorkshire, Driffield Terrace	-1.080278	aadr	MartinianoNatureCommunications2016
I0160.SG	1973	United Kingdom	England_IASG	52.08	England, South Cambridgeshire, East Anglia, Hinxton	0.18	aadr	SchiffelsNatureCommunications2016
I0789.SG	2163	United Kingdom	England_IASG	52.0991	England, Cambridgeshire, Linton	0.277	aadr	SchiffelsNatureCommunications2016
I13712	2914	United Kingdom	England_LBA	51.3603	England, Kent, East Kent Access Road	1.3405	aadr	PattersonNature2021
I13713	2912	United Kingdom	England_LBA	51.3603	England, Kent, East Kent Access Road	1.3405	aadr	PattersonNature2021
I14358	2808	United Kingdom	England_LBA	51.329195	England, Kent, Cliffs End Farm	1.3693088	aadr	PattersonNature2021
I14377	2889	United Kingdom	England_LBA	51.329195	England, Kent, Cliffs End Farm	1.3693088	aadr	PattersonNature2021
I14379	2801	United Kingdom	England_LBA	51.329195	England, Kent, Cliffs End Farm	1.3693088	aadr	PattersonNature2021
I14862	2834	United Kingdom	England_LBA	51.329195	England, Kent, Cliffs End Farm	1.3693088	aadr	PattersonNature2021
I14864	2839	United Kingdom	England_LBA	51.329195	England, Kent, Cliffs End Farm	1.3693088	aadr	PattersonNature2021
I16469	2945	United Kingdom	England_LBA	54.176006	England, North Yorkshire, Raven Scar Cave	-2.416361	aadr	PattersonNature2021
I7576	3039	United Kingdom	England_LBA	52.122402	England, Bedfordshire, Biddenham Loop	-0.511365	aadr	OlaldeNature2018
I7628	3033	United Kingdom	England_LBA	52.122402	England, Bedfordshire, Biddenham Loop	-0.511365	aadr	OlaldeNature2018
I7629	3015	United Kingdom	England_LBA	53.725076	England, Yorkshire, East Riding, North Ferriby, Melton Quarry	-0.523009	aadr	PattersonNature2021
I13617	3086	United Kingdom	England_LBA_highEEF	51.3323	England, Kent, Margetts Pit	0.4784	aadr	PattersonNature2021
I14861	2810	United Kingdom	England_LBA_highEEF	51.329195	England, Kent, Cliffs End Farm	1.3693088	aadr	PattersonNature2021
I13711	2928	United Kingdom	England_LBA_lowEEF	51.3603	England, Kent, East Kent Access Road	1.3405	aadr	PattersonNature2021
I11142	2067	United Kingdom	England_LIA	51.357334	England, Somerset, Worlebury	-2.988282	aadr	PattersonNature2021
I11144	1976	United Kingdom	England_LIA	50.88341	England, Somerset, North Perrott, North Perrott Manor	-2.760465	aadr	PattersonNature2021
I11145	2022	United Kingdom	England_LIA	50.88341	England, Somerset, North Perrott, North Perrott Manor	-2.760465	aadr	PattersonNature2021
I12785	2051	United Kingdom	England_LIA	51.885901	England, Gloucestershire, Bourton-on-the-water, Greystones Farm	-1.753493	aadr	PattersonNature2021
I12791	2051	United Kingdom	England_LIA	51.885901	England, Gloucestershire, Bourton-on-the-water, Greystones Farm	-1.753493	aadr	PattersonNature2021
I12927	1825	United Kingdom	England_LIA	51.95241	England, Gloucestershire, Bishop's Cleeve, Cleevelands	-2.078732	aadr	PattersonNature2021
I12931	1825	United Kingdom	England_LIA	51.95241	England, Gloucestershire, Bishop's Cleeve, Cleevelands	-2.078732	aadr	PattersonNature2021
I12932	1825	United Kingdom	England_LIA	51.95241	England, Gloucestershire, Bishop's Cleeve, Cleevelands	-2.078732	aadr	PattersonNature2021
I14096	1973	United Kingdom	England_LIA	54.3955	England, North Yorkshire, Scorton Quarry	-1.614	aadr	PattersonNature2021
I14097	2002	United Kingdom	England_LIA	54.3955	England, North Yorkshire, Scorton Quarry	-1.614	aadr	PattersonNature2021
I14351	2048	United Kingdom	England_LIA	53.9085	England, West Yorkshire, Wattle Syke	-1.384997	aadr	PattersonNature2021
I18599	1924	United Kingdom	England_LIA	51.323295	England, Kent, Sittingbourne, Highsted	0.73696	aadr	PattersonNature2021
I19870	2051	United Kingdom	England_LIA	51.3603	England, Kent, East Kent Access Road	1.3405	aadr	PattersonNature2021
I21302	1922	United Kingdom	England_LIA	51.0128	England, South Somerset, South Cadbury	-2.3152	aadr	PattersonNature2021
I21303	1995	United Kingdom	England_LIA	51.0128	England, South Somerset, South Cadbury	-2.3152	aadr	PattersonNature2021
I27379	2068	United Kingdom	England_LIA	50.806775	England, Sussex, North Bersted	-0.68987061	aadr	PattersonNature2021
I19869	2043	United Kingdom	England_LIA_daughterI19870	51.3603	England, Kent, East Kent Access Road	1.3405	aadr	PattersonNature2021
I17017	2051	United Kingdom	England_LIA_highEEF	51.313891	England, Somerset, Christon, Dibbles Farm	-2.885217	aadr	PattersonNature2021
I14360	1984	United Kingdom	England_LIA_o	53.9085	England, West Yorkshire, Wattle Syke	-1.384997	aadr	PattersonNature2021
I20615	1786	United Kingdom	England_Roman	50.60009092	England, Dorset, Worth Matravers, Football Field	-2.036950526	aadr	PattersonNature2021
I14352	2048	United Kingdom	England_LIA_sisterI14351	53.9085	England, West Yorkshire, Wattle Syke	-1.384997	aadr	PattersonNature2021
I13714	3423	United Kingdom	England_MBA	51.3603	England, Kent, East Kent Access Road	1.3405	aadr	PattersonNature2021
I16403	3425	United Kingdom	England_MBA	54.050362	England, North Yorkshire, Cockerham, Elbolton Cave	-1.989273	aadr	PattersonNature2021
I16454	3162	United Kingdom	England_MBA	50.536523	England, Cornwall, St. Merryn, Constantine Island	-5.025273	aadr	PattersonNature2021
I19857	3423	United Kingdom	England_MBA	51.052725	England, Wiltshire, Rowbarrow	-1.7862875	aadr	PattersonNature2021
I19858	3429	United Kingdom	England_MBA	51.052725	England, Wiltshire, Rowbarrow	-1.7862875	aadr	PattersonNature2021
I19859	3401	United Kingdom	England_MBA	51.052725	England, Wiltshire, Rowbarrow	-1.7862875	aadr	PattersonNature2021
I19860	3398	United Kingdom	England_MBA	51.052725	England, Wiltshire, Rowbarrow	-1.7862875	aadr	PattersonNature2021
I19913	3271	United Kingdom	England_MBA	51.3603	England, Kent, East Kent Access Road	1.3405	aadr	PattersonNature2021
I19915	3422	United Kingdom	England_MBA	51.3603	England, Kent, East Kent Access Road	1.3405	aadr	PattersonNature2021
I2448	3200	United Kingdom	England_MBA	51.7977	England, Oxfordshire, Yarnton	-1.313464	aadr	PattersonNature2021
I2639	3430	United Kingdom	England_MBA	51.168023	England, Wiltshire, Amesbury Down	-1.7725402	aadr	OlaldeNature2018
I3082	3386	United Kingdom	England_MBA	50.919204	England, Dorset, Sixpenny Handley, Canada Farm	-2.015441	aadr	OlaldeNature2018
I7568	3400	United Kingdom	England_MBA	52.34	England, Needingworth Quarry, Over Narrows	0.03	aadr	OlaldeNature2018
I7571	3306	United Kingdom	England_MBA	52.34	England, Needingworth Quarry, Over Narrows	0.03	aadr	OlaldeNature2018
I7572	3380	United Kingdom	England_MBA	52.34	England, Needingworth Quarry, Over Narrows	0.03	aadr	OlaldeNature2018
I7574	3271	United Kingdom	England_MBA	52.17839	England, Cambridgeshire, Trumpington, Clay Farm	0.122544	aadr	OlaldeNature2018
I7575	3107	United Kingdom	England_MBA	52.122402	England, Bedfordshire, Biddenham Loop	-0.511365	aadr	OlaldeNature2018
I7577	3198	United Kingdom	England_MBA	52.122402	England, Bedfordshire, Biddenham Loop	-0.511365	aadr	OlaldeNature2018
I7578	3080	United Kingdom	England_MBA	52.122402	England, Bedfordshire, Biddenham Loop	-0.511365	aadr	OlaldeNature2018
I7626	3231	United Kingdom	England_MBA	52.122402	England, Bedfordshire, Biddenham Loop	-0.511365	aadr	OlaldeNature2018
I7627	3268	United Kingdom	England_MBA	52.122402	England, Bedfordshire, Biddenham Loop	-0.511365	aadr	OlaldeNature2018
I7640	3307	United Kingdom	England_MBA	52.17839	England, Cambridgeshire, Trumpington, Clay Farm	0.122544	aadr	OlaldeNature2018
I13716	3223	United Kingdom	England_MBA_highEEF	51.3323	England, Kent, Margetts Pit	0.4784	aadr	PattersonNature2021
I2458	3331	United Kingdom	England_MBA_highEEF	51.168023	England, Wiltshire, Amesbury Down	-1.7725402	aadr	OlaldeNature2018
I7580	3087	United Kingdom	England_MBA_lowEEF	52.122402	England, Bedfordshire, Biddenham Loop	-0.511365	aadr	OlaldeNature2018
I7579	3349	United Kingdom	England_MBA_sisterI7580	52.122402	England, Bedfordshire, Biddenham Loop	-0.511365	aadr	OlaldeNature2018
I6767	10280	United Kingdom	England_Mesolithic	51.281679	England, Somerset, Cheddar, Gough's Cave	-2.765746	aadr	BraceDiekmannNatureEcologyEvolution2019
I6767_noUDG.SG	10280	United Kingdom	England_Mesolithic_noUDGSG	51.281679	England, Somerset, Cheddar, Gough's Cave	-2.765746	aadr	BraceDiekmannNatureEcologyEvolution2019
I6767.SG	10280	United Kingdom	England_MesolithicSG	51.281679	England, Somerset, Cheddar, Gough's Cave	-2.765746	aadr	BraceDiekmannNatureEcologyEvolution2019
I11147	2241	United Kingdom	England_MIA	51.313891	England, Somerset, Christon, Dibbles Farm	-2.885217	aadr	PattersonNature2021
I11148	2292	United Kingdom	England_MIA	51.313891	England, Somerset, Christon, Dibbles Farm	-2.885217	aadr	PattersonNature2021
I11150	2227	United Kingdom	England_MIA	52.079115	England, Bedfordshire, Broom Quarry	-0.280974	aadr	PattersonNature2021
I11151	2227	United Kingdom	England_MIA	52.079115	England, Bedfordshire, Broom Quarry	-0.280974	aadr	PattersonNature2021
I11153	2285	United Kingdom	England_MIA	52.170279	England, Cambridgeshire, Trumpington Meadows	0.105604	aadr	PattersonNature2021
I11156	2229	United Kingdom	England_MIA	52.564022	England, Cambridgeshire, Whittlesey, Bradley Fen	-0.179454	aadr	PattersonNature2021
I11997	2227	United Kingdom	England_MIA	52.564022	England, Cambridgeshire, Whittlesey, Bradley Fen	-0.179454	aadr	PattersonNature2021
I12770	2225	United Kingdom	England_MIA	53.079803	England, Derbyshire, Brassington, Carsington Pasture Cave	-1.640942	aadr	PattersonNature2021
I12771	2326	United Kingdom	England_MIA	53.079803	England, Derbyshire, Brassington, Carsington Pasture Cave	-1.640942	aadr	PattersonNature2021
I12775	2225	United Kingdom	England_MIA	53.079803	England, Derbyshire, Brassington, Carsington Pasture Cave	-1.640942	aadr	PattersonNature2021
I12778	2230	United Kingdom	England_MIA	53.079803	England, Derbyshire, Brassington, Carsington Pasture Cave	-1.640942	aadr	PattersonNature2021
I13615	2250	United Kingdom	England_MIA	51.3603	England, Kent, East Kent Access Road	1.3405	aadr	PattersonNature2021
I13680	2224	United Kingdom	England_MIA	50.949985	England, Somerset, Ham Hill	-2.735842	aadr	PattersonNature2021
I13685	2265	United Kingdom	England_MIA	51.313891	England, Somerset, Christon, Dibbles Farm	-2.885217	aadr	PattersonNature2021
I13687	2222	United Kingdom	England_MIA	52.170279	England, Cambridgeshire, Trumpington Meadows	0.105604	aadr	PattersonNature2021
I13717	2259	United Kingdom	England_MIA	51.15	England, Hampshire, Barton-Stacey Pipeline	-1.36	aadr	PattersonNature2021
I13727	2243	United Kingdom	England_MIA	52.170279	England, Cambridgeshire, Trumpington Meadows	0.105604	aadr	PattersonNature2021
I13728	2227	United Kingdom	England_MIA	52.170279	England, Cambridgeshire, Trumpington Meadows	0.105604	aadr	PattersonNature2021
I13729	2350	United Kingdom	England_MIA	52.170279	England, Cambridgeshire, Trumpington Meadows	0.105604	aadr	PattersonNature2021
I13730	2237	United Kingdom	England_MIA	51.3603	England, Kent, East Kent Access Road	1.3405	aadr	PattersonNature2021
I13731	2246	United Kingdom	England_MIA	51.3603	England, Kent, East Kent Access Road	1.3405	aadr	PattersonNature2021
I13732	2269	United Kingdom	England_MIA	51.3603	England, Kent, East Kent Access Road	1.3405	aadr	PattersonNature2021
I14347	2224	United Kingdom	England_MIA	53.9085	England, West Yorkshire, Wattle Syke	-1.384997	aadr	PattersonNature2021
I14348	2222	United Kingdom	England_MIA	53.9085	England, West Yorkshire, Wattle Syke	-1.384997	aadr	PattersonNature2021
I14380	2235	United Kingdom	England_MIA	51.329195	England, Kent, Cliffs End Farm	1.3693088	aadr	PattersonNature2021
I14549	2267	United Kingdom	England_MIA	50.836656	England, Sussex, Brighton, Woodingdean	-0.075378	aadr	PattersonNature2021
I14551	2349	United Kingdom	England_MIA	50.844866	England, Sussex, Brighton, Slonk Hill	-0.266087	aadr	PattersonNature2021
I14800	2228	United Kingdom	England_MIA	51.75	England, Oxfordshire, Thame	-0.99	aadr	PattersonNature2021
I14801	2214	United Kingdom	England_MIA	51.75	England, Oxfordshire, Thame	-0.99	aadr	PattersonNature2021
I14802	2247	United Kingdom	England_MIA	51.75	England, Oxfordshire, Thame	-0.99	aadr	PattersonNature2021
I14804	2233	United Kingdom	England_MIA	51.75	England, Oxfordshire, Thame	-0.99	aadr	PattersonNature2021
I14807	2241	United Kingdom	England_MIA	51.75	England, Oxfordshire, Thame	-0.99	aadr	PattersonNature2021
I14808	2274	United Kingdom	England_MIA	51.75	England, Oxfordshire, Thame	-0.99	aadr	PattersonNature2021
I14858	2254	United Kingdom	England_MIA	51.329195	England, Kent, Cliffs End Farm	1.3693088	aadr	PattersonNature2021
I14859	2227	United Kingdom	England_MIA	51.329195	England, Kent, Cliffs End Farm	1.3693088	aadr	PattersonNature2021
I14860	2231	United Kingdom	England_MIA	51.329195	England, Kent, Cliffs End Farm	1.3693088	aadr	PattersonNature2021
I14863	2225	United Kingdom	England_MIA	51.329195	England, Kent, Cliffs End Farm	1.3693088	aadr	PattersonNature2021
I14866	2226	United Kingdom	England_MIA	51.329195	England, Kent, Cliffs End Farm	1.3693088	aadr	PattersonNature2021
I16592	2231	United Kingdom	England_MIA	51.313891	England, Somerset, Christon, Dibbles Farm	-2.885217	aadr	PattersonNature2021
I16597	2283	United Kingdom	England_MIA	52.079115	England, Bedfordshire, Broom Quarry	-0.280974	aadr	PattersonNature2021
I16599	2295	United Kingdom	England_MIA	51.168023	England, Wiltshire, Amesbury Down	-1.7725402	aadr	PattersonNature2021
I17014	2227	United Kingdom	England_MIA	51.313891	England, Somerset, Christon, Dibbles Farm	-2.885217	aadr	PattersonNature2021
I17015	2227	United Kingdom	England_MIA	51.313891	England, Somerset, Christon, Dibbles Farm	-2.885217	aadr	PattersonNature2021
I17016	2226	United Kingdom	England_MIA	51.313891	England, Somerset, Christon, Dibbles Farm	-2.885217	aadr	PattersonNature2021
I17261	2224	United Kingdom	England_MIA	51.140932	England, Hampshire, Middle Wallop, Suddern Farm	-1.598337	aadr	PattersonNature2021
I19044	2228	United Kingdom	England_MIA	52.210906	England, Cambridgeshire, Marshall's Jaguar Land Rover New Showroom (JLU15)	0.177859	aadr	PattersonNature2021
I19045	2238	United Kingdom	England_MIA	52.210906	England, Cambridgeshire, Marshall's Jaguar Land Rover New Showroom (JLU15)	0.177859	aadr	PattersonNature2021
I19046	2228	United Kingdom	England_MIA	52.210906	England, Cambridgeshire, Marshall's Jaguar Land Rover New Showroom (JLU15)	0.177859	aadr	PattersonNature2021
I19211	2250	United Kingdom	England_MIA	51.7977	England, Oxfordshire, Yarnton	-1.313464	aadr	PattersonNature2021
I19656	2231	United Kingdom	England_MIA	50.949985	England, Somerset, Ham Hill	-2.735842	aadr	PattersonNature2021
I19872	2275	United Kingdom	England_MIA	51.3603	England, Kent, East Kent Access Road	1.3405	aadr	PattersonNature2021
I19873	2250	United Kingdom	England_MIA	51.3603	England, Kent, East Kent Access Road	1.3405	aadr	PattersonNature2021
I19874	2250	United Kingdom	England_MIA	51.3603	England, Kent, East Kent Access Road	1.3405	aadr	PattersonNature2021
I19907	2250	United Kingdom	England_MIA	51.3603	England, Kent, East Kent Access Road	1.3405	aadr	PattersonNature2021
I19908	2250	United Kingdom	England_MIA	51.3603	England, Kent, East Kent Access Road	1.3405	aadr	PattersonNature2021
I19909	2227	United Kingdom	England_MIA	51.3603	England, Kent, East Kent Access Road	1.3405	aadr	PattersonNature2021
I19910	2250	United Kingdom	England_MIA	51.3603	England, Kent, East Kent Access Road	1.3405	aadr	PattersonNature2021
I19911	2250	United Kingdom	England_MIA	51.3603	England, Kent, East Kent Access Road	1.3405	aadr	PattersonNature2021
I19912	2222	United Kingdom	England_MIA	51.3603	England, Kent, East Kent Access Road	1.3405	aadr	PattersonNature2021
I19914	2233	United Kingdom	England_MIA	51.3603	England, Kent, East Kent Access Road	1.3405	aadr	PattersonNature2021
I20582	2217	United Kingdom	England_MIA	51.74585	England, Oxfordshire, Stanton Harcourt, Gravelly Guy	-1.416236	aadr	PattersonNature2021
I20586	2250	United Kingdom	England_MIA	51.7977	England, Oxfordshire, Yarnton	-1.313464	aadr	PattersonNature2021
I20587	2244	United Kingdom	England_MIA	51.7977	England, Oxfordshire, Yarnton	-1.313464	aadr	PattersonNature2021
I20588	2225	United Kingdom	England_MIA	51.7977	England, Oxfordshire, Yarnton	-1.313464	aadr	PattersonNature2021
I20589	2250	United Kingdom	England_MIA	51.7977	England, Oxfordshire, Yarnton	-1.313464	aadr	PattersonNature2021
I20627	2227	United Kingdom	England_MIA	53.235833	England, Derbyshire, Fin Cop	-1.736944	aadr	PattersonNature2021
I20990	2220	United Kingdom	England_MIA	51.138291	England, Hampshire, Nether Wallop, Danebury	-1.53093	aadr	PattersonNature2021
I21178	2250	United Kingdom	England_MIA	51.7977	England, Oxfordshire, Yarnton	-1.313464	aadr	PattersonNature2021
I21179	2228	United Kingdom	England_MIA	51.7977	England, Oxfordshire, Yarnton	-1.313464	aadr	PattersonNature2021
I21180	2267	United Kingdom	England_MIA	51.7977	England, Oxfordshire, Yarnton	-1.313464	aadr	PattersonNature2021
I21181	2250	United Kingdom	England_MIA	51.7977	England, Oxfordshire, Yarnton	-1.313464	aadr	PattersonNature2021
I21182	2250	United Kingdom	England_MIA	51.7977	England, Oxfordshire, Yarnton	-1.313464	aadr	PattersonNature2021
I21293	2263	United Kingdom	England_MIA	52.079115	England, Bedfordshire, Broom Quarry	-0.280974	aadr	PattersonNature2021
I3014	2225	United Kingdom	England_MIA	53.079803	England, Derbyshire, Brassington, Carsington Pasture Cave	-1.640942	aadr	PattersonNature2021
I20583	2233	United Kingdom	England_MIA_highEEF	51.74585	England, Oxfordshire, Stanton Harcourt, Gravelly Guy	-1.416236	aadr	PattersonNature2021
I11143	2145	United Kingdom	England_MIA_LIA	51.357334	England, Somerset, Worlebury	-2.988282	aadr	PattersonNature2021
I11152	2179	United Kingdom	England_MIA_LIA	52.346588	England, Cambridgeshire, Over	0.031827553	aadr	PattersonNature2021
I11991	2116	United Kingdom	England_MIA_LIA	51.357334	England, Somerset, Worlebury	-2.988282	aadr	PattersonNature2021
I11992	2095	United Kingdom	England_MIA_LIA	51.357334	England, Somerset, Worlebury	-2.988282	aadr	PattersonNature2021
I11993	2200	United Kingdom	England_MIA_LIA	50.949985	England, Somerset, Ham Hill	-2.735842	aadr	PattersonNature2021
I11994	2200	United Kingdom	England_MIA_LIA	50.949985	England, Somerset, Ham Hill	-2.735842	aadr	PattersonNature2021
I12790	2200	United Kingdom	England_MIA_LIA	50.409374	England, Cornwall, Newquay, Tregunnel	-5.088903	aadr	PattersonNature2021
I12793	2200	United Kingdom	England_MIA_LIA	50.409374	England, Cornwall, Newquay, Tregunnel	-5.088903	aadr	PattersonNature2021
I12926	2200	United Kingdom	England_MIA_LIA	51.709659	England, Gloucestershire, Fairford, Saxon Way	-1.791815	aadr	PattersonNature2021
I13616	2153	United Kingdom	England_MIA_LIA	51.3603	England, Kent, East Kent Access Road	1.3405	aadr	PattersonNature2021
I13726	2133	United Kingdom	England_MIA_LIA	51.357334	England, Somerset, Worlebury	-2.988282	aadr	PattersonNature2021
I14353	2120	United Kingdom	England_MIA_LIA	53.9085	England, West Yorkshire, Wattle Syke	-1.384997	aadr	PattersonNature2021
I14809	2199	United Kingdom	England_MIA_LIA	51.75	England, Oxfordshire, Thame	-0.99	aadr	PattersonNature2021
I14837	2134	United Kingdom	England_MIA_LIA	53.8954	England, West Yorkshire, Dalton Parlours	-1.388994	aadr	PattersonNature2021
I16450	2050	United Kingdom	England_MIA_LIA	50.203523	England, Cornwall, Newquay, Trethellan Farm	-5.199698	aadr	PattersonNature2021
I16457	2050	United Kingdom	England_MIA_LIA	50.203523	England, Cornwall, Newquay, Trethellan Farm	-5.199698	aadr	PattersonNature2021
I16458	2050	United Kingdom	England_MIA_LIA	50.203523	England, Cornwall, Newquay, Trethellan Farm	-5.199698	aadr	PattersonNature2021
I16601	2082	United Kingdom	England_MIA_LIA	51.168023	England, Wiltshire, Amesbury Down	-1.7725402	aadr	PattersonNature2021
I17262	2176	United Kingdom	England_MIA_LIA	51.140932	England, Hampshire, Middle Wallop, Suddern Farm	-1.598337	aadr	PattersonNature2021
I17263	2114	United Kingdom	England_MIA_LIA	51.138291	England, Hampshire, Nether Wallop, Danebury	-1.53093	aadr	PattersonNature2021
I17264	2225	United Kingdom	England_MIA_LIA	51.138291	England, Hampshire, Nether Wallop, Danebury	-1.53093	aadr	PattersonNature2021
I17267	2225	United Kingdom	England_MIA_LIA	51.138291	England, Hampshire, Nether Wallop, Danebury	-1.53093	aadr	PattersonNature2021
I19042	2245	United Kingdom	England_MIA_LIA	51.07	England, Hampshire, Winnall Down	-1.29	aadr	PattersonNature2021
I19657	2183	United Kingdom	England_MIA_LIA	50.949985	England, Somerset, Ham Hill	-2.735842	aadr	PattersonNature2021
I19854	2200	United Kingdom	England_MIA_LIA	50.949985	England, Somerset, Ham Hill	-2.735842	aadr	PattersonNature2021
I19855	2200	United Kingdom	England_MIA_LIA	50.949985	England, Somerset, Ham Hill	-2.735842	aadr	PattersonNature2021
I20584	2161	United Kingdom	England_MIA_LIA	51.74585	England, Oxfordshire, Stanton Harcourt, Gravelly Guy	-1.416236	aadr	PattersonNature2021
I20621	2175	United Kingdom	England_MIA_LIA	53.235833	England, Derbyshire, Fin Cop	-1.736944	aadr	PattersonNature2021
I20622	2186	United Kingdom	England_MIA_LIA	53.235833	England, Derbyshire, Fin Cop	-1.736944	aadr	PattersonNature2021
I20623	2225	United Kingdom	England_MIA_LIA	53.235833	England, Derbyshire, Fin Cop	-1.736944	aadr	PattersonNature2021
I20628	2131	United Kingdom	England_MIA_LIA	53.235833	England, Derbyshire, Fin Cop	-1.736944	aadr	PattersonNature2021
I20631	2175	United Kingdom	England_MIA_LIA	53.235833	England, Derbyshire, Fin Cop	-1.736944	aadr	PattersonNature2021
I20982	2176	United Kingdom	England_MIA_LIA	51.140932	England, Hampshire, Middle Wallop, Suddern Farm	-1.598337	aadr	PattersonNature2021
I20983	2176	United Kingdom	England_MIA_LIA	51.140932	England, Hampshire, Middle Wallop, Suddern Farm	-1.598337	aadr	PattersonNature2021
I20984	2176	United Kingdom	England_MIA_LIA	51.140932	England, Hampshire, Middle Wallop, Suddern Farm	-1.598337	aadr	PattersonNature2021
I20985	2176	United Kingdom	England_MIA_LIA	51.140932	England, Hampshire, Middle Wallop, Suddern Farm	-1.598337	aadr	PattersonNature2021
I20986	2176	United Kingdom	England_MIA_LIA	51.140932	England, Hampshire, Middle Wallop, Suddern Farm	-1.598337	aadr	PattersonNature2021
I20987	2176	United Kingdom	England_MIA_LIA	51.140932	England, Hampshire, Middle Wallop, Suddern Farm	-1.598337	aadr	PattersonNature2021
[truncated: 3,983 more rows]
