# Supplementary figures and images for: Whole-Genome Sequencing of 502 Individuals from Latvia: The First Step towards a Population-Specific Reference of Genetic Variation
Source: MDPI journal article supplement (doi:10.3390/ijms242015345), 2023-10-19

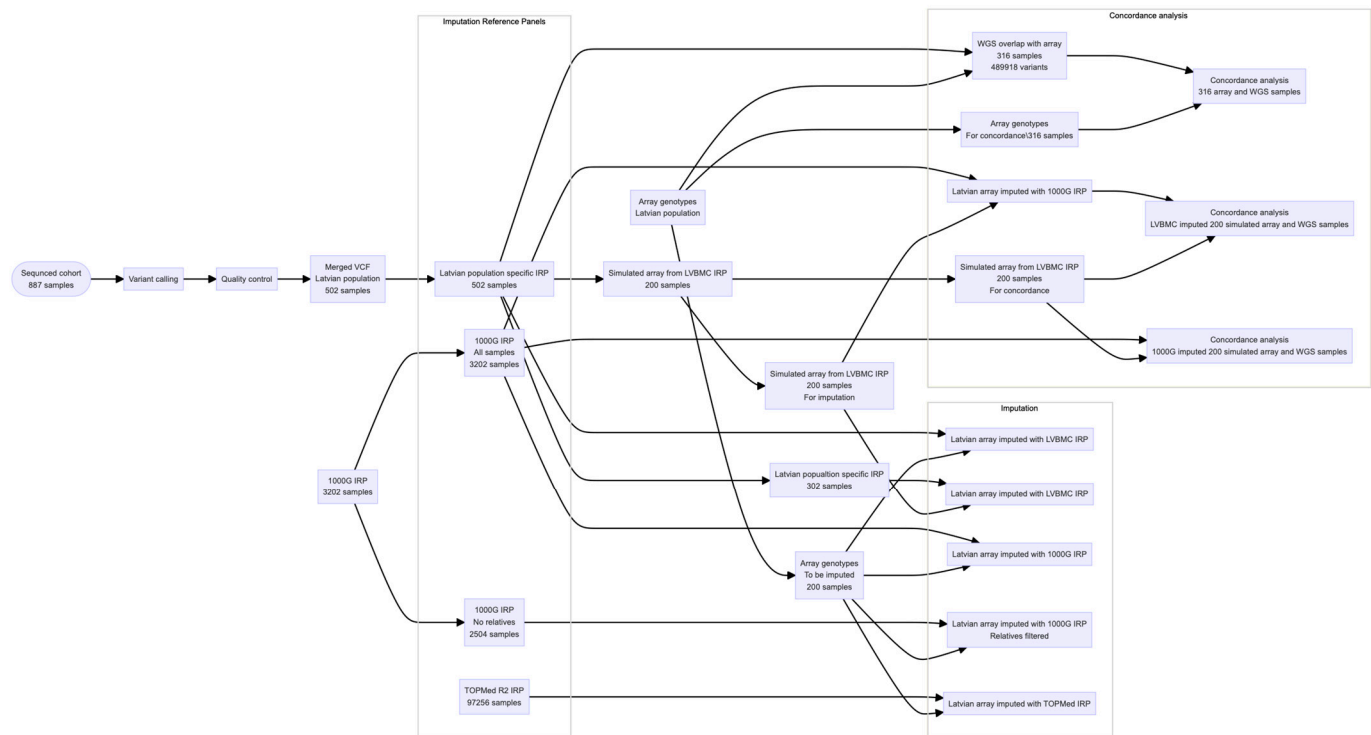

**Figure S1:** Flowchart of initial data preparation, imputation, and concordance analysis.

Supplement: s1 [file s1]
